# Supplementary material for: Evolutionary origins of sensation in metazoans: functional evidence for a new sensory organ in sponges
Source: PubMed Central journal article supplement (PMC3890488; doi:10.1186/1471-2148-14-3), 2014-01-13
Supplement: 1471-2148-14-3-S1.pdf [file 1471-2148-14-3-S1.pdf]

## **SUPPLEMENTARY INFORMATION**

### **Sensory cilia in sponges**

Ludeman, DA<sup>1</sup>, Farrar, N<sup>1</sup>, Riesgo, A<sup>2</sup>, Paps, J<sup>3</sup> and Leys, SP<sup>1\*</sup>

<sup>1</sup>Department of Biological Sciences, University of Alberta, Edmonton, Alberta T6G 2E9, Canada.

<sup>2</sup>Department of Animal Biology, Universitat de Barcelona, Avinguda Diagonal 643, 08028, Barcelona, Spain

<sup>3</sup>Department of Zoology, University of Oxford, Oxford, OX1 3PS, United Kingdom.

\*Author for correspondence

Address: CW 405 Biological Sciences Building, University of Alberta, Edmonton, Alberta T6G 2E9, Canada

Phone: (780) 492-6629

Fax: (780) 492-9234

Email: sleys@ualberta.ca

### **This .pdf file includes:**

Supplementary Figure S1

Supplementary Figure Legends S2-S5

Supplementary Figures S2-S5

Supplementary Movie Legend S1

**Supplementary Figure S1**

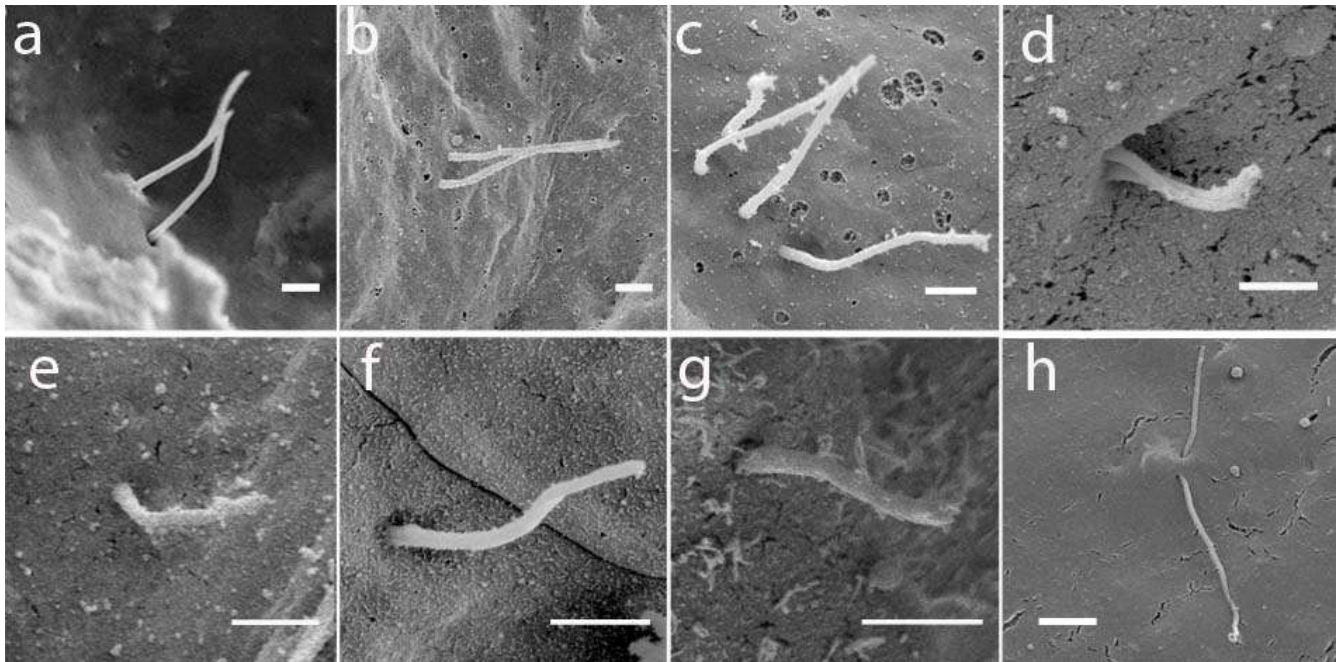

**Supplementary Figure S1| Cilia in the oscula of various demosponges** **a.** *Ephydatia muelleri*, **b, c.** *Spongilla lacustris*, **d.** *Neopetrosia vanilla*, **e.** *Haliclona mollis*, **f.** *Haliclona* sp., **g.** *Neopetrosia problematica*, **h.** *Aphrocallistes vastus*. Scale bars 1  $\mu$ m.

**Supplementary Figure S2**| Uncompressed tree showing the evolutionary relationships of sponge TRP Type I and II genes. Values at nodes indicate Bootstrap support.

**Supplementary Figure S3**| Full alignment of TRP sequences for uncompressed tree in from Fig 5a

**Supplementary Figure S4**| Phylobayes alignment of data in 5c

**Supplementary Figure S5** Full alignment of sequences in Figure 5c and list of Sponge TRP Fastas

### **Supplementary Movie Legend**

**Supplementary Movie S1**| Cilia in the osculum of a live sponge, *Ephydatia muelleri*, labeled using FM1-43. High-frequency time-lapse microscopy (images taken at 50 millisecond intervals with exposure of 50 milliseconds) indicates that the cilia are non-motile and only vibrate in the flow that passes out the osculum.

Supplementary Figure S2  
Uncompressed form of tree  
shown in figure 5a

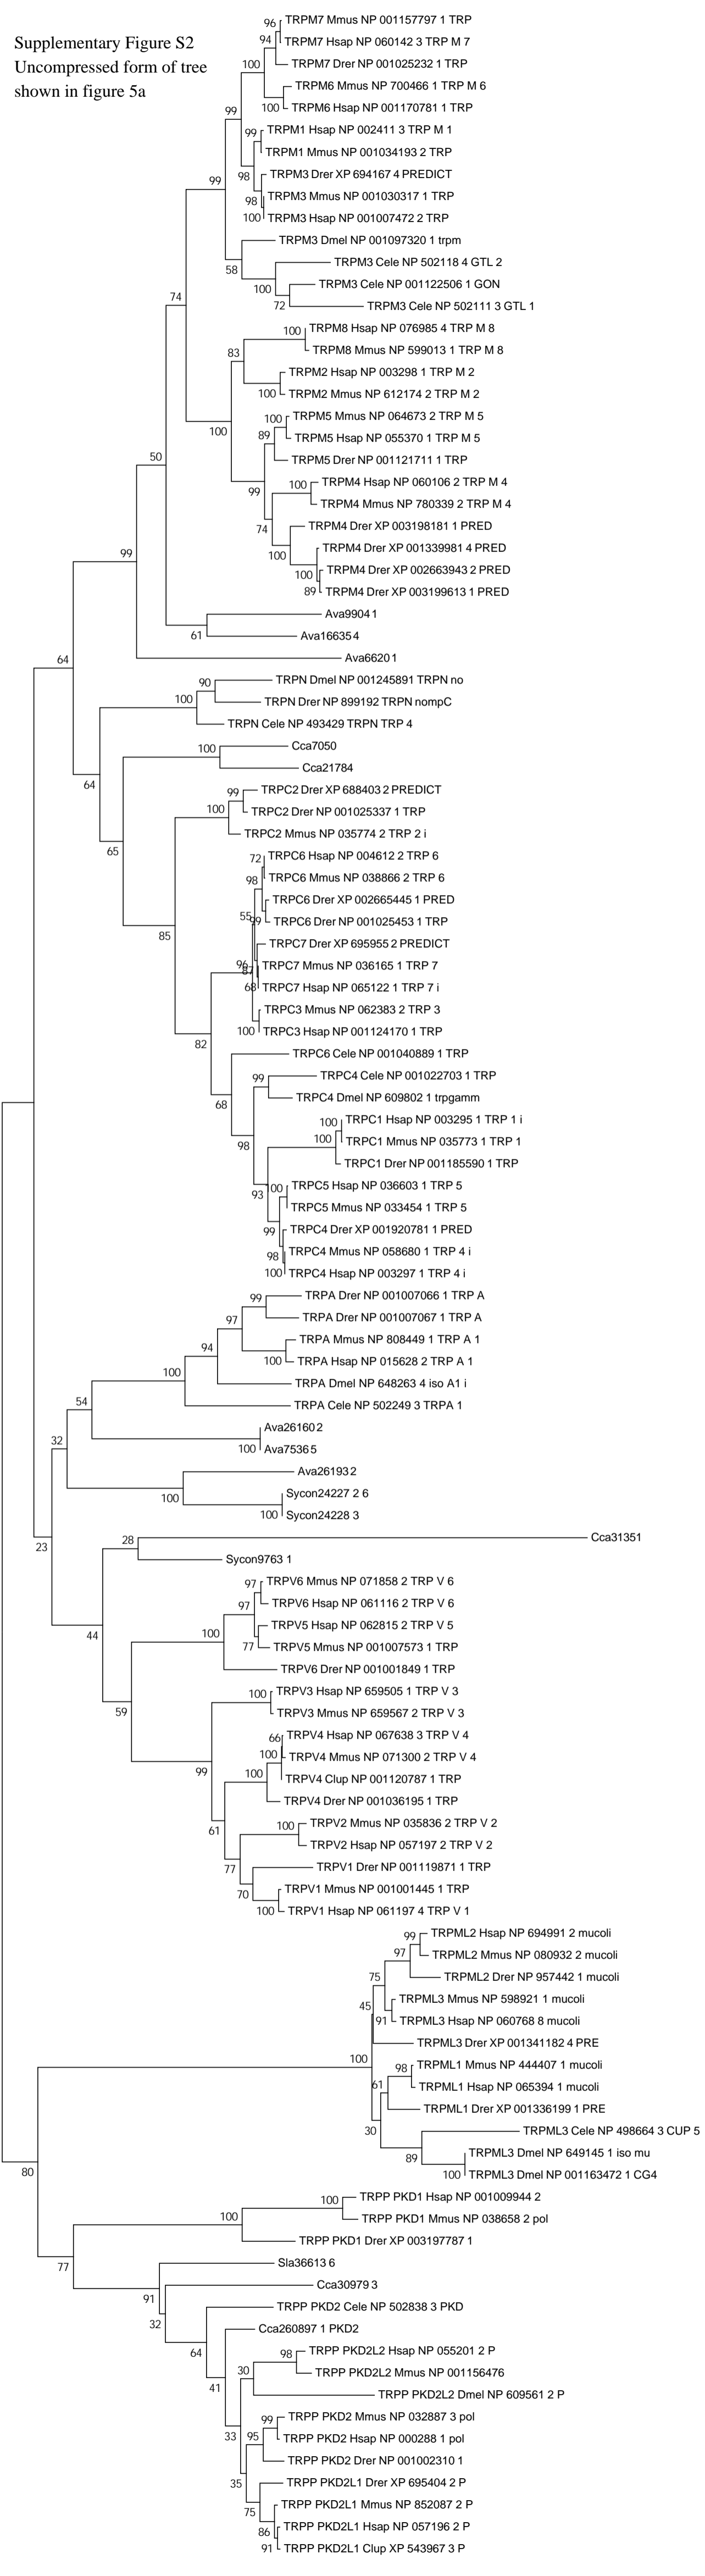

0.5

Supplementary figure S3: Definitive alignment used for tree shown in figure 5a

|            |            |      |           |             |             |             |            |            |             |            |       |       |
|------------|------------|------|-----------|-------------|-------------|-------------|------------|------------|-------------|------------|-------|-------|
| TRPC1_Hsap | NP_003295  | 1    | TRP_1_i   | LFLACDKGD   | YVMVKKILEN  | LDIQLQLLDY  | G-----     | -----      | -----       | -----      | ----- | ----- |
| TRPC1_Mmus | NP_035773  | 1    | TRP_1LF   | LLACDKGDY   | MVKKILESID  | ILQLQLLDYGS | ADALLVAIDS | EVVGAVDILL | NHRKRSILAA  |            |       |       |
| TRPC1_Drer | NP_001185  | 590  | 1         | TRP_LFL     | LFLACEKGD   | YVMVKKILEN  | LDIQLQLLDH | GATDALLVAT | DSEVVGAVDI  | LLNHRRRSIL |       |       |
| TRPC2_Mmus | NP_035774  | 2    | TRP_2_i   | TLLRAIQEGQ  | LGLVQQLLGH  | EVITDVLAK   | FIHEALLVAV | DTNQPAVRR  | LLARLERETL  |            |       |       |
| TRPC2_Drer | NP_001025  | 337  | 1         | TRP_ELL     | GAIRESGN    | LNLVSSLLGN  | EDTMASLLQK | FIHEALLVAV | DTNQPRVVRK  | LLDRLDQETL |       |       |
| TRPC2_Drer | XP_688403  | 2    | PREDICT   | ELILAIQEGN  | MAWVDSLLGS  | EDIMTSLLK   | FIHEALLVAV | DTNQPRFVKH | LLDRLDLETL  |            |       |       |
| TRPC3_Hsap | NP_001124  | 170  | 1         | TRP_RFL     | DAAEYGN     | IPVVRKMLEH  | LEVTELLKKE | EIGDALLLAI | SKGYVRIVEA  | ILNHPGFAL  |       |       |
| TRPC3_Mmus | NP_062383  | 2    | TRP_3RF   | LDAAEYGNIP  | VVRKMLEHLE  | VTPELLKKEI  | GDALLLAI   | SKGYVRIVEA | ILNHPGFAL   |            |       |       |
| TRPC4_Hsap | NP_003297  | 1    | TRP_4_i   | AYLNAVEKGD  | YASVVKKSLEN | LELIELLSF   | NVGDALLHAI | RKEVVGAVEL | LLNHHKPSIL  |            |       |       |
| TRPC4_Mmus | NP_058680  | 1    | TRP_4_i   | AYLNAVEKGD  | YASVVKKSLEN | LELIELLSF   | NVGDALLHAI | RKEVVGAVEL | LLNHHKPSIL  |            |       |       |
| TRPC4_Drer | XP_001920  | 781  | 1         | PRED        | SYLSAVEKGD  | YASVKLALEN  | LEIIELLSF  | NVGDALLHAI | RKEVVGAVEL  | LLNHHKPSIL |       |       |
| TRPC4_Dmel | NP_609802  | 1    | trp_gamm  | KFLLAVERGD  | MAGTRRMLN   | LEMVELLINY  | NTKDALLHSI | SEEFVAVEVE | LLDHENVITL  |            |       |       |
| TRPC4_Cele | NP_001022  | 703  | 1         | TRP_QFLL    | SCERGD      | IGSVKRLLEN  | TEMIELLDH  | NTGDAILYAI | GEENVEAVEI  | IYEHLKMDVL |       |       |
| TRPC5_Hsap | NP_036603  | 1    | TRP_5AF   | LNAVEKGDYA  | TVKQALENLE  | IMELLNHSV   | GDALLYAIRK | EVVGAVELLL | SYRKPMSLAA  |            |       |       |
| TRPC5_Mmus | NP_033454  | 1    | TRP_5AF   | LSAVEKGDYA  | TVKQALENLE  | IMELLNHSV   | GDALLYAIRK | EVVGAVELLL | SYRKPMSLAA  |            |       |       |
| TRPC6_Hsap | NP_004612  | 2    | TRP_6RF   | LDAAEYGNIP  | VVRKMLEHLE  | ITPELLKKEV  | GDALLLAI   | SKGYVRIVEA | SHPAFALIAA  |            |       |       |
| TRPC6_Mmus | NP_038866  | 2    | TRP_6RF   | LDAAEYGNIP  | VVRKMLEHLE  | ITPELLKKEV  | GDALLLAI   | SKGYVRIVEA | NHPAFALIAA  |            |       |       |
| TRPC6_Drer | NP_001025  | 453  | 1         | TRP_RFL     | DAAEYGN     | IPVVRKMLEH  | LEVTELLKKE | DIGDALLLAI | SKGYVRIVEA  | ILSHQAFAL  |       |       |
| TRPC6_Drer | XP_002665  | 445  | 1         | PRED        | RFLEAAEYGN  | IPVIRRMLEH  | LEVTELLKKE | EIGDALLLAI | SKGYIRIVEA  | ILSHQAFAL  |       |       |
| TRPC6_Cele | NP_001040  | 889  | 1         | TRP_RFLE    | AAELGN      | KPTIQECLN   | MEVVELLQQ  | PIGNALLCAI | REGVYRLVEV  | LVNHPNITIL |       |       |
| TRPC7_Hsap | NP_065122  | 1    | TRP_7_i   | RFLDSAIEYGN | IPVVRKMLEH  | LEVTELLKKE  | EVGDALLLAI | SKGYVRIVEA | ILNHPAFAL   |            |       |       |
| TRPC7_Mmus | NP_036165  | 1    | TRP_7RF   | LDSAIEYGNIP | VVRKMLEHLE  | VTPELLKKEV  | GDALLLAI   | SKGYVRIVEA | SHPAFALIAA  |            |       |       |
| TRPC7_Drer | XP_695955  | 2    | PREDICT   | RFLDAAEYGN  | IPSVRKMELH  | LEVTELLKKE  | EVGDALLLAI | SKGYVRIVEA | ILAHPAFETL  |            |       |       |
| TRPN_Dmel  | NP_0012458 | 91   | TRPN_no   | PMHLAENGH   | AHVIEILAGH  | MELVNLLAA   | RGRSALHLAA | ERGLHVCA   | LLTNKFINHL  |            |       |       |
| TRPN_Cele  | NP_493429  | TRPN | TRP_4     | PVHVAERGD   | TSMVESLIGH  | SGVANILKA   | RGRTALHLAA | FNGHLSIVHL | LLQHKFVNHL  |            |       |       |
| TRPN_Drer  | NP_899192  | TRPN | nompC     | PLHIAAERGH  | TVMVEILTGH  | TEVVKILLQA  | RGKAAIHLAA | QRGHSLIVDV | LLSHKSFVNHL |            |       |       |
| TRPM1_Hsap | NP_002411  | 3    | TRP_M_1   | PLVGLVVEGG  | PNVVSVIVLD  | IARSQIFVFH  | WLEQAMLDAL | VLDRVDFVKL | LIENGNMQR   |            |       |       |
| TRPM1_Mmus | NP_001034  | 193  | 2         | TRP_PV      | VGLVVEGG    | PNVVSVIVLD  | IARSQIFVFH | WLEQAMLDAL | VLDRVDFVKL  | LIENGNMQR  |       |       |
| TRPM2_Hsap | NP_003298  | 1    | TRP_M_2   | PVVCVVELEGG | PNTLERSVD   | IARSEIFMDQ  | WLEASLMDAL | LVNDRPFVRL | LIENGNMQR   |            |       |       |
| TRPM2_Mmus | NP_612174  | 2    | TRP_M_2   | PVVCVVELEGG | PNTLERSVD   | IARSEIFMDQ  | WLEASLMDAL | LVNDRPFVRL | LIENGNMQR   |            |       |       |
| TRPM3_Hsap | NP_001007  | 472  | 2         | TRP_PV      | VVALIVEGG   | PNVISIVLVD  | IARSQIFIYQ | WLEQAMLDAL | VLDRVDFVKL  | LIENGSMHRL |       |       |
| TRPM3_Mmus | NP_001030  | 317  | 1         | TRP_PV      | VVALIVEGG   | PNVISIVLVD  | IARSQIFIYQ | WLEQAMLDAL | VLDRVDFVKL  | LIENGSMHRL |       |       |
| TRPM3_Drer | XP_694167  | 4    | PREDICT   | PVVALIVEGG  | PNVISIVLVD  | IARSQIFIYQ  | WLEQAMLDAL | VLDRVDFVKL | LIENGSMHRL  |            |       |       |
| TRPM3_Dmel | NP_001097  | 320  | 1         | trpm_PV     | CVLIVEGG    | PNVISIVLVD  | IARSEIFVYE | WLDEAMQCAL | EHRIDFVKL   | LIENGSMKRL |       |       |
| TRPM3_Cele | NP_001122  | 506  | 1         | GON_PV      | CVVLEGG     | SCTIRSVLVD  | IARSDVFAME | WLHNAMMEAL | IHDRVDFVRL  | LLEQGNMQR  |       |       |
| TRPM3_Cele | NP_502111  | 3    | GTL_1PL   | VCVVLEGGAF  | TIKMVHADIA  | RTEIFANEWL  | HNAMIEALSN | DRIDFVHLL  | ENGSMQRLEH  |            |       |       |
| TRPM3_Cele | NP_502118  | 4    | GTL_2PV   | VCTLLEGGIS  | SINAIHVDLA  | KSCLSFSNKWL | EKAMNDALYW | DRVDFVECLL | ENGSMKRLN   |            |       |       |
| TRPM4_Hsap | NP_060106  | 2    | TRP_M_4   | PVLLLLIDGD  | EKMLTRIEVD  | IAQSELFVRGQ | WLEASLMDAL | LNDRPFVRL  | LISHGSLGR   |            |       |       |
| TRPM4_Mmus | NP_780339  | 2    | TRP_M_4   | PVLLLLIDGD  | EKMLTRIEVD  | IAQSELFVRGQ | WLEASLMDAL | LNDRPFVRL  | LISHGSLGR   |            |       |       |
| TRPM4_Drer | XP_003199  | 613  | 1         | PRED        | PVLNMLIAGD  | TSMLEFLEVD  | IARSELFNQD | WLVDSTMDAL | ENNKPFVRL   | LIDNGNILRL |       |       |
| TRPM4_Drer | XP_001339  | 981  | 4         | PRED        | PVLNMLIAGD  | TSMLEFLEVD  | IARSELFNQD | WLVDSTMDAL | ENNKPFVRL   | LIDNGNISRL |       |       |
| TRPM4_Drer | XP_002663  | 943  | 2         | PRED        | PVLNMLIAGD  | TSMLEFLEVD  | IARSELFNQD | WLVDSTMDAL | ENNKPFVRL   | LIDNGNILRL |       |       |
| TRPM4_Drer | XP_003198  | 181  | 1         | PRED        | PVLCVLIAGD  | ATMLERVDVD  | IARTELFNGH | WLEESMTDAL | VNDKPDFVRL  | FVESGNILRL |       |       |
| TRPM5_Hsap | NP_055370  | 1    | TRP_M_5   | PVLCVLIAGD  | ATMLERISVD  | IARSEIFNGE  | WLEEVMTDAL | VSNKPDFVRL | FVDNGDVAR   |            |       |       |
| TRPM5_Mmus | NP_064673  | 2    | TRP_M_5   | PVLCVLIAGD  | ATMLERISVD  | IARSEIFNGE  | WLEEVMTDAL | VSNKPDFVRL | FVDSGDMAR   |            |       |       |
| TRPM5_Drer | NP_001121  | 711  | 1         | TRP_PV      | CLLVHGE     | PNLQKMYVD   | IARSEIFSGQ | WLEEVMMEL  | VNDKPDFVRL  | FVDNGNIKRL |       |       |
| TRPM6_Hsap | NP_001170  | 781  | 1         | TRP_PV      | GLVVEGG     | PNVILSVWVD  | IARSKHILYH | WLEQAMSDAL | VMDRVDFVKL  | LIENGNLHRL |       |       |
| TRPM6_Mmus | NP_700466  | 1    | TRP_M_6   | PVGLVMEGG   | PNVILVWVMD  | IARSKHILYH  | WLEQAMLDAL | VMDRVDFVKL | LIENGNLHRL  |            |       |       |
| TRPM7_Hsap | NP_060142  | 3    | TRP_M_7   | PVVALIFEGG  | PNVILTIVLD  | IARNHVVFYQ  | WLEQAMLDAL | VMDRVDFVKL | LIENGNMQR   |            |       |       |
| TRPM7_Mmus | NP_001157  | 797  | 1         | TRP_PV      | VVALIFEGG   | PNVILTIVLD  | IARNHVVFYQ | WLEQAMLDAL | VMDRVDFVKL  | LIENGNMQR  |       |       |
| TRPM7_Drer | NP_001025  | 232  | 1         | TRP_PV      | VVALIFEGG   | PNVILTIVLD  | IARDHVVFYQ | LLEQAMLDAL | VMDRVEFVKL  | LIENGNMQR  |       |       |
| TRPM8_Hsap | NP_076985  | 4    | TRP_M_8   | PVCFQAQGG   | KETLKAINLD  | LANDEIFTNR  | WLQEVMTAL  | IKDRPKFVRL | FLNGNLRL    |            |       |       |
| TRPM8_Mmus | NP_599013  | 1    | TRP_M_8   | PVCFQAQGG   | RETLKAINLD  | LASDEIFTNR  | WLQEVMTAL  | IKDRPKFVRL | FLNGNLRL    |            |       |       |
| TRPA_Hsap  | NP_015628  | 2    | TRP_A_1P  | LHIAVQGMN   | EVMKVLEHG   | YSRQLHINN   | KATPLHLAVQ | NGDLEMIKMC | LDNGQIDILA  |            |       |       |
| TRPA_Mmus  | NP_808449  | 1    | TRP_A_1P  | LHIAVQGMN   | EVMKVLEHG   | YSRQLHINN   | KATPLHLAVQ | NGDLEMIKMC | LDNGHIDILA  |            |       |       |
| TRPA_Drer  | NP_0010070 | 66   | 1         | TRP_A_P     | IHMVSLK     | NFVLEQLVEA  | GLSIDAHIND | KCSSPLHLAV | RGGNLDIKL   | CIGYKIDLL  |       |       |
| TRPA_Drer  | NP_0010070 | 67   | 1         | TRP_A_P     | HLAVTKQY    | NHLAEVLLEL  | GVSTLHIND  | KKSTPLHLAV | RGGNIEVIKL  | CILKGVKVEL |       |       |
| TRPA_Dmel  | NP_648263  | 4    | iso_A1_i  | PVHLATELNK  | VKSLRVMGQR  | GCTREEMISD  | SGNVPLHSAP | HGGDIKAVEL | CLKSGKISL   |            |       |       |
| TRPA_Cele  | NP_502249  | 3    | TRP_A_1PL | HYAAMKSNFS  | ALHALIHDV   | EAIKALNNSK  | KTPLRMAVEG | NHPETLKKIL | QMEKNSMMAV  |            |       |       |
| TRPV1_Hsap | NP_061197  | 4    | TRP_V_1   | SIFEVAQN    | CQDLESLLQT  | DSLKELVNAT  | DGQTALHIAI | ERRNMAVTL  | LVENGDVQSL  |            |       |       |
| TRPV1_Mmus | NP_001001  | 445  | 1         | TRP_SIF     | DAVAQSN     | CQDLESLLRT  | DSLKQFVNAT | DGQTALHIAI | ERRNMAVTL   | LVENGDVQSL |       |       |
| TRPV1_Drer | NP_001119  | 871  | 1         | TRP_RL      | FEAVSSE     | VSKMQGLHRM  | GNLKNFINAT | DGQTALHIAI | ERRSMKVFQ   | LVKQGDVHSL |       |       |
| TRPV2_Hsap | NP_057197  | 2    | TRP_V_2   | RLFNAVSRGV  | PEDLAGLPS   | DNPQPLVNAT  | DGHSALHIAI | EKRSLQCVKL | LVENGNVHSL  |            |       |       |
| TRPV2_Mmus | NP_035836  | 2    | TRP_V_2   | RLFSVSRGV   | PEELTGLLDS  | GNPQPLVNAT  | DGHSALHIAI | EKRSLWCVKL | LVENGNVHSL  |            |       |       |
| TRPV3_Hsap | NP_659505  | 1    | TRP_V_3   | RIFAAVSEGC  | VEELVELLEN  | DILGRFINAT  | EGQTALNIAI | ERRQGDIAAL | LIAAGDVNAL  |            |       |       |
| TRPV3_Mmus | NP_659567  | 2    | TRP_V_3   | RIFAAVSEGC  | VEELVELLEN  | DILGRFINAT  | EGQTALNIAI | ERRQGDITAV | LIAAGDVNAL  |            |       |       |
| TRPV4_Hsap | NP_067638  | 3    | TRP_V_4   | ILFDIVSRGS  | TADLDGLLRT  | GNMREFINSR  | DGQTALHIAI | ERRCKHYVEL | LVAQGDVHSL  |            |       |       |
| TRPV4_Clup | NP_001120  | 787  | 1         | TRP_ILF     | DIVSRGS     | TTDLDGLLRT  | GNMREFINSR | DGQTALHIAI | ERRCKHYVEL  | LVAQGDVHSL |       |       |
| TRPV4_Mmus | NP_071300  | 2    | TRP_V_4   | ILFDIVSRGS  | TADLDGLLRT  | GNMREFINSR  | DGQTSLHIAI | ERRCKHYVEL | LVAQGDVHSL  |            |       |       |
| TRPV4_Drer | NP_001036  | 195  | 1         | TRP_ML      | FEAVSRAD    | PRALDGLLQT  | GNLREFINTR | DGQMALHIAI | ERRCKHYVEL  | LVEKQDVHSL |       |       |
| TRPV5_Hsap | NP_062815  | 2    | TRP_V_5   | PLLRASKEND  | LSVLRQLLDN  | LEAALVLMEP  | EGQTALHIAV | VNQNVLVRA  | LLTRS SVSS  |            |       |       |
| TRPV5_Mmus | NP_001007  | 573  | 1         | TRP_PLL     | RAAKEND     | MCTLKKLQDN  | LDAAIMLMEP | YGQTALHIAV | MNQNVLVRA   | LLARG SASS |       |       |
| TRPV6_Hsap | NP_061116  | 2    | TRP_V_6   | PLLLAAKDND  | VQALNKLLDN  | LEAAMVLMEP  | EGQTALHIAV | VNQNMLVRA  | LLAR SSVS   |            |       |       |
| TRPV6_Mmus | NP_071858  | 2    | TRP_V_6   | PLLLAAKEND  | VQALSKLLDN  | LEAAMVLMEP  | EGQTALHIAV | VNQNMLVRA  | LLARG SVSS  |            |       |       |
| TRPV6_Drer | NP_001001  | 849  | 1         | TRP_PLF     | SATKENN     | AACIKLLDN   | FEAAVALMNP | EGLTALHIAV | INQNPNLW    | MIKRGDVTF  |       |       |
| TRPML1_Hsa | p_NP_06539 | 4    | 1         | mucoli      | KLMLQVVKIL  | VVTVQLILNT  | IARFHLFLLS | DADDTF--AA | YTQLYQAIFH  | AVDQYALPAL |       |       |
| TRPML1_Mmu | s_NP_44440 | 7    | 1         | mucoli      | KLMLQVVKIL  | VVTVQLILNT  | IARFHLFLLS | DSDDTF--AA | YTQLYQAIFY  | AVDQYILPAL |       |       |

TRPML1\_Dre r\_XP\_00133 6199\_1\_PRE KLALQLLKII IVTVQLVMNT DSFKHLFLRV ESQEP--CL HTQVHEHIRY AIDQYILSYE  
TRPML2\_Hsa p\_NP\_69499 1\_2\_mucoli KLGLQILKIV MVTQQLVRNT VAFKHLFLKS GDEDDYSCSV YTDAYESIFF AINQYQLKKV  
TRPML2\_Mmu s\_NP\_08093 2\_2\_mucoli KLGLQILKIV MVTQQLVRNT VAFKHLFLKS GDEDDYSCSI YTNTYESIFF AIKQYHLKKV  
TRPML2\_Dre r\_NP\_95744 2\_1\_mucoli KLAIVQIFKIF MITTQLLNL MAFKNLFLKS GDEDEYSISI YTRVFDLSHY VLDQYQLQII  
TRPML3\_Hsa p\_NP\_06076 8\_8\_mucoli KLAIQILKIA MVTIQLVLT IAFKHLFLKM DMDTTY--AV YTDVYDQLIF AVNQYQLYAI  
TRPML3\_Mmu s\_NP\_49892 1\_1\_mucoli KLAIQILKIA MVTIQLVLT IAFKHLFLKM DMDTTY--AV YTEVYDQIIF AVTQYQLQAI  
TRPML3\_Dre r\_XP\_00134 1182\_4\_PRE KLFLOIVKIA VVTVQLVSNL LTFRHLFLKS ENTNTY--AI YTDVYTHITH IVQQFMLPCI  
TRPML3\_Dme l\_NP\_00116 3472\_1\_CG4 KFFVQIVKIF LVTMQLCLNR FAFSHLFLRD SAVGPF--AL YLEFFDTVOY AVNGYNVSKL  
TRPML3\_Dme l\_NP\_64914 5\_1\_iso\_mu KFFVQIVKIF LVTMQLCLNR FAFSHLFLRD SAVGPF--AL YLEFFDTVOY AVNGYNVSKL  
TRPML3\_Cel e\_NP\_49866 4\_3\_CUP\_5 KLVLQVLKIV FVTMQLLIT TVMRHRFLKN DAEGRY--SV YDGLSEHLSE LINSYSIREV  
TRPP\_PKD1\_Hsap NP\_00 1009944\_2 DMSLAVEQGA PVVVSAAVQ LRATNMLGSA DFVEPVGWLM VAPNPAAVNT SVTLSELATQ  
TRPP\_PKD1\_Mmus NP\_03 8658\_2\_pol YLSPSVEQGA PMVVSASVH LRATNMLGSA NFVEPVESLI LSPNPAAVNM SLTLCELAAR  
TRPP\_PKD1\_Drer XP\_00 3197787\_1 MSSAPTEHNT PTVIRASLVI LKATNLLGQV NFLDPVQDLV LEPNPAAVNA MTNMTSVNRK  
TRPP\_PKD2\_Hsap NP\_00 0288\_1\_pol FLDTPVSKTE KTNFKTLS-- --YENLLLGVP RIRQLRVRNG SCSIPDLREI  
TRPP\_PKD2\_Mmus NP\_03 2887\_3\_pol FIDTPVSKTE KTNFKTLS-- --YENLLLGVP RLRQLRVRNG SCSIPDLREI  
TRPP\_PKD2\_Drer NP\_00 1002310\_1 FLDTPLSSGE PTNFKLSL-- --YENLLLGVP RLRQLRVRNE SCSVHDLREI  
TRPP\_PKD2\_Cele NP\_50 2838\_3\_PKD FVASTGASG APAFGSCT-- --YENRLLGEP RIRMLKVTDND SCTVMSFQEI  
TRPP\_PKD2L\_Hsap NP 057196\_2\_P FLHTPSDTC-- -VSFQAIS-- --YENMLLGVP RLRQLRVRND RLRQLRVRND SCVHDFRDI  
TRPP\_PKD2L\_1\_Clup XP 543967\_3\_P FLHTPSDTC-- -VSFQAIS-- --YENMLLGVP RLRQLRVRND RLRQLRVRND SCVHDFRDI  
TRPP\_PKD2L\_1\_Mmus NP 852087\_2\_P FLHTPSDSC-- -VSFQIS-- --YENMLLGEP RLRQLRVRND RLRQLRVRND SCVHDFRDI  
TRPP\_PKD2L\_1\_Drer XP 695404\_2\_P FVNLPGSNG-- -MSFSSIG-- --YENMLLGVP RVRQLKVKQN SCKVPDFKEI  
TRPP\_PKD2L\_2\_Hsap NP 055201\_2\_P FLDTSPVPEG RTNFKSIR-- --YENILGVP RVRQLRVRNN TCKVYRFQML  
TRPP\_PKD2L\_2\_Mmus NP 001156476 FVDTSPLPDE RSSFRSIR-- --YENVLLGIP RVRQLRVRNN TCKVYAFQLV  
TRPP\_PKD2L\_2\_Dmel NP 609561\_2\_P NREMVPVPSV TVGFEKLISD SIQANMSFHE GYENLLGPP RLRQIRVRKE SCYVNAFIYF  
Cca7050 LFLHACVHGS KATLQELLE LAIAARVDHQ DGSTPLHYAC AENDAVISL LIEAGDMNML SIKSQHIYQD LYTLFERMAK  
Cca21784 -----MQ TAIDRGVDSH DGNTPPLHYAA AADNHEVEL LIGDADTNCF AVLSQRHIEK LFTLYRHWGY  
Cca260897\_1\_EKD2FVNV KLESGSSSTF ESIT----- --YEN KLLGRPRRLR LRVRS DSCSI HEFKEITDCY GDSRDYWATG  
Sla36613\_6 -----  
Sycon24227\_2\_6SAQQPR RESNYSRVTE VSAAEAVMNI VENSQ----- --EARH LLDGLIARGD LG----- FVYVAHDAMR  
Sycon24228\_3SAQQPRRE SNYSRVTEVS AEEAVMNIVE NSQ----- --EARHLL DGLIARGDLG -----FV YVAHDAMRKM  
Sycon9763\_1-----  
Aval6635\_4 PIVRIVDINT LHVIEQVGV D LAEQNIFTEV WLFQHYFAIL ILNQVDLEL MLERNIDHNL ERLYFNLFYI WNAIAGMHH  
Ava9904\_1 PAVCLLDLNS IDGLRHTLPS LALEKIFIEK WVQRIFFSAL TTNTGTGFVR MLESK---YL SQLYKRQVFI WTVAIRGMRK  
Ava7536\_5 -----MA FVSKYALDLS TRKQVFHNL LEFNRLDTR-----  
Ava6620\_1 --IRYALFYGS REIVENIFNN SDIQORLIKE ELFQRLMFAL TKDEEYVEK IKGCKEFTSL EVVKFLYIMV WNAILYGVEQ  
Cca31351 DIGVQEEVQ MDTARTFS----- --VEEKL TSDESEFVKF MNGNENVDVF KEKGGLALEM FTARLNVISL  
Cca30979\_3 DIVLKANGGS GIAFS DVS----- --PYLKLVGKP RLKQFRVEKG SCTVPILAEV TRCYNSTWLI WGTGVVLDLR  
Ava26193\_2 VLHAKNREGD TPFELAVN----- --KQDAMAAYL AGPDYEVRR L FTASGDPS-----  
Ava26160\_2 -----

TRPC1\_Hsap AAHRNRLDI YRALLKLSL VIKYNOKEFV SQSNCOQFIN TVIHTPFMK EIHGASYFT ELLLNLYRI DYLLIWIIG  
TRPC1\_Mmus HRNRLDIYR ALLKLSLVI KYNQKEFVSQ SNCQQLNTV WIHTPFMFI IHGASYFTL LLLNLYRIDY LLLIWIIGMI  
TRPC1\_Drer AAHRNRLDI YRALLKLSL VIKYNOKEFV AQSNCQFIN TVIHTPFIK EIHGASYFT ELLLNLYYFI DYLLIWIIG  
TRPC2\_Mmus ACQKDLRINT YAALLRRLAR KVNYNQKQFV AHPICQOVHS SIWLIKIPVLK ELLHSASYLW ELIFLGEVW ESHLMIWVTG  
TRPC2\_Drer ACQKDLRINT YSALLRRLSK KVNYNQKQFV AHPICQOVHS SIWLIKIPVIK ELLHSASYMW ELITLGEIL HSFHMVVVVG  
TRPC2\_Drer ACQKDLRINT YSALLRRLSK KVNYNQKQFV THPICQOVHS SIWLIKIPVIK ELLHSASYMW ELIALTEIL HSLHVVVVG  
TRPC3\_Hsap AAHCQRINA YTALLAKLAN IIKYEVKQFV AHPNCQQLL TILRSFPMK EVAHAASEII ELGLFNWNT EMLIMVWVG  
TRPC3\_Mmus HCHKRINAYT ALLAKLANII KYEVKQFVAH PNCQQLLTI WLRSPFMK FVAHAASFIIFL GLLVFNWTEM LIMVWVWVG  
TRPC4\_Hsap AAHTNRLINI YTALLQELSK VIKYRQKEFV AQPNCQQLLA SRWIRKPFIK FICHTASYLT ELFLLLLAIV EMMILPWLVLG  
TRPC4\_Mmus AAHTNRLINI YTALLQELSK VIKYRQKEFV AQPNCQQLLA SRWIRKPFIK FICHTASYLT ELFLLLLATV EMMILPWLVLG  
TRPC4\_Drer AAHTNRLINI YTALLQELSK VIKYRQKEFV AQPNCQQLLA SRWIRKPFIK FICHTASYLT ELFLLLLATV EMMILPWLVLG  
TRPC4\_Dmel AAHRDNRINA YTALLRRLSF LIKLRQKQFV AHSNVQQLLA SIWIRKPFIK FICHSASYFT ELFLMLAFI EWLILAWVSG  
TRPC4\_Cele AAHKDNRINA YYALLRRLSF IIQLSQKRFV AHPNCQQLL DPAKPFIK ELSHSGSYIF ELILLIMAI ECAIFLWVVG  
TRPC5\_Hsap HTNRLINIYT ALLKLSKVI KYHQKEFVAQ PNCQQLLATL WIKKPFIKI CHTASYLTFL EMLLAVVEW MILPWLGF  
TRPC5\_Mmus HTNRLINIYT ALLKLSKVI KYHQKEFVAQ PNCQQLLATL WIKKPFIKI CHTASYLTFL EMLLAVVEW MILPWLGF  
TRPC6\_Hsap HCQERINAYT ALLAVLANII KYEVKQFVAH PNCQQLLSI WMRGPFMK FVAHAASFTIFL GLLVMNWMEM LIISWVIGMI  
TRPC6\_Mmus HCQERINAYT ALLAVLANII KYEVKQFVAH PNCQQLLSI WLRGPFMK FVAHAASFTIFL GLLVMNWMEM LIISWVIGMI  
TRPC6\_Drer ASHCHERINA YAALLASLAN IIKYELKQFV AHPNCQQLL SIWIRGPFIL EVAHAASFTI ELGLVMNWM EMLIISWVIG  
TRPC6\_Drer ASHCHERINA YTALLAVLAN IIKYELKQFV AHPNCQQLL SIWIRGPFIL EVAHAASFTI ELGLLMNWM EMLIISWVVG  
TRPC6\_Cele AAQLNQRINT FSALLQRLAF EIKYEQKAFV SHPHCQQLIT SIWVRSFPMK EFYYSVSFAT ELGLLWAWV ESLVFTWVIG  
TRPC7\_Hsap AAHCQERINA YTALLARLAN IIKYEVKQFV AHPNCQQLL TMWLRSPFMK EVAHAVSETI ELGLLVNWT EMLIMKWVLG  
TRPC7\_Mmus HCQERINAYT ALLARLANII KYEVKQFVAH PNCQQLLTM WLRSPFMK FVAHAVSETI ELGLVNWTEM LIMKWVWVG  
TRPC7\_Drer AAHCQERINA YTALLAQLAN IIKYEVKQFV AHPNCQQLL TLWLRSPFMK EVAHAVSETI ELCLLVNWT EMLIMKWVLG  
TRPN\_Dmel AAMNGFHMSV VTALYIVLST KIENEQKEVI AHTVQRYIQ ELWNVKPIIK EMSYLTSHIY IMIHSIVWY EVGLLIWLSG  
TRPN\_Cele AAQGHGHIIV VTALYRDMSE KIENEQKEVV SYASVQRYIT EVNWRAPLIK EVCHIVSHVY ETILLIIVPV EWLILLWLSG  
TRPN\_Drer SAQNGSHTAV VTALLTLCAL RIEGRQKGVV SQPAVQTYIT EVWNTIPIVK EMSHLVSHIF LLTLFILTSV ECLLIWLCG  
TRPM1\_Hsap EELYNTELMV WKAAYKAMAH EVAAKHRDFI AHTCSQMLIT DMWYNAPIVK EWFYTSIYLG YLLLFNYVQ EWIWISYIVS  
TRPM1\_Mmus EELYNTELMV WKAAYKAMAH EVAAKHRDFI AHTCSQMLIT DMWYNAPIVK EWFYTSIYLG YLLLFNYVQ EWIWISYIVS  
TRPM2\_Hsap LYLYENDLLI WAAACKELSK ELEAKDMKQFV SHGGIQAFT KVWFAPVVV EHLNLSYFA ELCLFAYVWC ECAIYLWLSF  
TRPM2\_Mmus LCLYENDLLI WAAACKELSK ELEAKDMKQFV SHGGIQAFT KVWFAPVVV EHLNLSYFA ELCLFAYVWC ECAIYLWLSF  
TRPM3\_Hsap EELYNTELMV WKAACKAMAH EVAAKHRDFI AHTCSQMLIT DMWYNAPIVK EWFYTLAYIG YLMFLNYITQ EWLISYIFT  
TRPM3\_Mmus EELYNTELMV WKAACKAMAH EVAAKHRDFI AHTCSQMLIT DMWYNAPIVK EWFYTLAYIG YLMFLNYITQ EWIWISYIFT  
TRPM3\_Drer EELYNTELMV WKAACKAMAH EVAAKHRDFI AHTCSQMLIT DMWYNAPIVK EWFHTLAYVG YLMFLNYITQ EWIWIAIYIT  
TRPM3\_Dmel EELYNTLLI WKSSYKAMAH EVAANHRALL AHPCQVITA DLWYTAPIK EWFADSIAYMF ELMIFSFTWQ EWSIAYIT  
TRPM3\_Cele DELYNTELMV WKAAYKSLAH EIVVNNKHFL AHPCCQILTA DLWYSAPIT EWSWTISFIL EITFFYITVI EYILYAVAA  
TRPM3\_Cele LYNTDLMWK AAYVSLAKTA NNGHRKFLAH PCCQMLLSDL WYKAPITYW LWFFAFWFL ILLTYNWEW YVFAYFVWT  
TRPM3\_Cele LYNMDLLWK CAYKATAKIV LANTRKFLAH PCCQILLAE L WYSSPITKEW SWCIAFLIFL TTQTCIKYEW ITFIYVTLS

|            |            |            |            |            |             |             |             |             |
|------------|------------|------------|------------|------------|-------------|-------------|-------------|-------------|
| TRPM4_Hsap | AQLYSADLLI | WSAALRVMAR | LMQADARAFF | AQDGVQSLIT | QKHWGAPVTI  | FMGNVVSYLE  | ELLLFSRVSL  | ELLLYFWAFT  |
| TRPM4_Mmus | AQLYSADLLI | WSAALRVMAR | LMQADARAFF | AQDGVQSLIT | QKHWGAPVTA  | ELGNVVSYLE  | ELLLFAHVVS  | ELLLYFWAFT  |
| TRPM4_Drer | EKLYNSSLFI | WTAGLVELSK | QIAADARIFF | SHDGVQSLIS | QIHWYAPVTS  | EIGNLLMYFL  | ELFLYAYVVS  | EYVLYFWVFT  |
| TRPM4_Drer | EILYNSCLFI | WTAGLLELSK | QIAADARIFF | SHDGVQSLIS | QIHWYAPVTS  | EIGNLLMYFL  | ELFLYAYVVS  | EYVLYFWVFT  |
| TRPM4_Drer | EKLYNSCLFI | WTAGLLELSK | QIAADAQIFF | SHDGVQSLIS | QIHWYAPVTS  | EIGNLLMYFL  | ELFLYAYVVS  | EYVLYFWVFT  |
| TRPM4_Drer | ELYSSSSLFI | WSAGLELSK  | LTSADARLFF | SHDGVQSLIS | ELHWYAPVTS  | ELGNVLMYFL  | ELFLYAYVPL  | ELVLYFWVFT  |
| TRPM5_Hsap | QELYRSDLFL | WAAALKEMSH | LTEADAKAFF | AHDGVQAFIT | RIHWGAPVTV  | ELGNVVMYFA  | ELFLFTYVGP  | EVTLYFWVFT  |
| TRPM5_Mmus | QQLYHSDLFL | WAAAIKEMSH | LTEADAKAFF | AHDGVQAFIT | KLHWGAPVTV  | ELGNVVMYFA  | ELFLFTYVGS  | EVTLYFWVFT  |
| TRPM5_Drer | QELYCSDLFL | WAAGMKEMAH | LTLAEAKCFF | AHDGVQALIT | KVHWASAPVTV | EMGNVIMYFA  | ELILFSYVAA  | EILLYFWVFT  |
| TRPM6_Hsap | EELYNTDLLV | WKAAYRAMAH | EVSGGLRPFV | SHTCTOMLIT | DMHWASAPIVK | EFWYTMAYLA  | ELMLFTYTVQ  | ELVLSIYIFT  |
| TRPM6_Mmus | EELYNTDLLV | WKAAYRAMAR | EVSGGLRPFV | SHSCTOMLIT | DMHWASAPFVK | EFWYTMAYLA  | ELMLFTYTVH  | ELWLVIYIFT  |
| TRPM7_Hsap | EELYNTELLI | WKAAYRSMAY | EVSSRLRPFV | AHTCTOMLIS | DMHWASAPIVK | EFWNTLAYLG  | ELMLYTFVVQ  | EWIVIAYIFT  |
| TRPM7_Mmus | EELYNTELLI | WKAAYRSMAY | EVSSRLRPFV | AHTCTOMLIS | DMHWASAPIVK | EFWNTLAYLG  | ELMLYTFVVQ  | EWIVIAYIFT  |
| TRPM7_Drer | EELYNTELLV | WKAALRSLGD | EVSSRLRPFV | AHTCTOMLIS | DMHWASAPIVK | EFWNTLFYIG  | ELMLYSFVPO  | EWVLSIYIFT  |
| TRPM8_Hsap | TELFNSALFI | WAAALKTLAK | VVEATDQHFI | AQPGVQNFIS | KQWFTSPFVV  | ESWNVVFYIA  | ELLLFAYVPP  | ELVLYSLVVF  |
| TRPM8_Mmus | TELFSTALFI | WAAALKTLAK | VVEATDQHFI | AQPGVQNFIS | KQWFTSPFVV  | ESWNVVFYIA  | ELLLFAYVTP  | ELILYALVVF  |
| TRPA_Hsap  | TASASHDKV  | NKAHLALHNK | VQNNRIELN  | HPVCKEYLLM | KWLAYGFRAH  | MMNLGSYCLG  | LIPMTILTCM  | ILVFLSSIFG  |
| TRPA_Mmus  | TASASHDKV  | NKAHLALHNK | VQNNRIELN  | HPVCKEYLLM | KWLAYGFRAH  | MMNLGSYCLG  | LIPMTILTCM  | ILVFLSSIFG  |
| TRPA_Drer  | ATSCGAHVKV | VNKAHEAVHN | AVNFNRVNLL | THPVCKKYIE | MKWYSAYGIKA | HLLNMTVYAL  | GVFPPLYLSS  | MLLVLAMNMY  |
| TRPA_Drer  | ASSCSAHAQV | VNDNHEAVRN | EVRYNRLLE  | IHPLSRKYIE | MKWYAYGSKV  | HFLNLAIYLL  | GLLPLTYLVC  | IIMVIVMNVY  |
| TRPA_Dmel  | AASRSHATR  | VNVMDYAIYY | KVTHGRVELL | AHPLSKQKYE | MKNYSYGYK   | HLANLLIYSI  | ELVFTYIYFC  | AVVIVVYILL  |
| TRPA_Cele  | THDSGHATD  | EKDIACENDA | DAEKLRLLNH | PLSKALKYK  | WNRLGRPMY   | EALFMYLVFI  | VSLTQVWKKI  | IIQTLAVCQI  |
| TRPV1_Hsap | AACTNQKIGV | LTCKLEVIAY | SETPNRHDM  | LVEPLNRLIQ | DKWDRFVKRI  | EYFNFLVYCL  | YMIIFTMATG  | EILSVLGGVY  |
| TRPV1_Mmus | AACTNQKIGV | LTCKLEVIAY | SETPNRHDM  | LVEPLNRLIQ | DKWDRFVKRI  | EYFNFFVYCL  | YMIIFTTATG  | EILSVSGGVY  |
| TRPV1_Drer | AACTNQKIGL | FTCELEIVVY | GEIPNRLEML | QIEPLNRLIE | AKWQDFAHRM  | ELFNFIYVVI  | YLFIFTASTG  | HIISITGAFY  |
| TRPV2_Hsap | AACTKQKIEI | EYCKEIIAF  | HKSPHRHRMV | VLEPLNKLIQ | AKW-DLLIPK  | EFLNFCNLII  | YMFIFTAVTG  | HILYLLGGIY  |
| TRPV2_Mmus | AACTKQKIEI | FSWKLEIIAF | HKSPHRHRMV | VLEPLNKLIQ | EKW-DRLIPR  | EFFNFACLVV  | YMIIFTIVLG  | HILILLGGIY  |
| TRPV3_Hsap | AACTNQKAEI | LTDDLEITVY | NNIDNRHEML | TLEPLHTLTH | MKNKFKAKHM  | EFLSFCFYFF  | YNITLTLVLG  | RMFVLWAMC   |
| TRPV3_Mmus | AACTNQKAEI | LTDDLEIVVY | NNIDNRHEML | TLEPLHTLTH | MKNKFKAKYM  | EFLSFCFYFF  | YNITLTLVLG  | RMFVLWATC   |
| TRPV4_Hsap | AACTNQKIGI | FTCELEILVY | NKIENRHEML | AVEPINELHR | DKWRKFGAVS  | EYINVVSYLC  | AMVIFTLTAG  | EITTLFTGVL  |
| TRPV4_Clup | AACTNQKIGV | FTCELEILVY | NKIENRHEML | AVEPINELHR | DKWRKFGAVS  | EYINVVSYLC  | AMVIFTLTAG  | EITTLFTGVL  |
| TRPV4_Mmus | AACTNQKIGV | FTCELEILVY | NKIENRHEML | AVEPINELHR | DKWRKFGAVS  | EYINVVSYLC  | AMVIFTLTAG  | EITTLFTGVL  |
| TRPV4_Drer | AACTNQKIGV | FTCELEILVY | NKIENRHEML | AVEPINELHR | AKWQKFAAVT  | EYISVVSFLV  | TMIIFTLVGG  | EITTVGSGLF  |
| TRPV5_Hsap | AACVNSNTVM | FSWELELVVS | SKKKEARQIL | EQTPVKELVS | LKNKKGQPY   | ECLLGALYIF  | YVVCFTTCVG  | ELVTVIGAVI  |
| TRPV5_Mmus | AACVNSNTVM | FSWELELVVS | SKKKEARQIL | EQTPVKELVS | LKNKKGQPY   | ECLLGALYIF  | YVVCFTTCVG  | ELVTVIGAVI  |
| TRPV6_Hsap | AACVNSNTVM | FSSELELIIT | TKKREARQIL | DQTPVKELVS | LKNKRYGRPY  | ECLMGALYLL  | YIICFTMCVG  | ELVTVIGAVI  |
| TRPV6_Mmus | AACVNSNTVM | FSSELELIIT | TKKREARQIL | DQTPVKELVS | LKNKRYGRPY  | ECLMGALYLL  | YIICFTMCVG  | ELVTVIGAVI  |
| TRPV6_Drer | AACVGN--V  | FSRELEIIAT | SHKKEARRIL | ELTPVROQLT | LKNLVIYGHY  | ERSLMVYLV   | YIISFTVCIG  | EIISLGIAI   |
| TRPML1_Hsa | CQRYYHNLT  | K-----     | -ITFDNKAHS | GRIPISLET- | ---VFQ--HG  | DNSFRLLEDV  | VVILTCSLLC  | ASLLRGFLLF  |
| TRPML1_Mmu | CQRYYHNLT  | K-----     | -ITFDNKAHS | GRIPIRLET- | ---VSR--HG  | DNSFRLLEDV  | VVILTCSLLC  | ASLLRGFLLF  |
| TRPML1_Dre | CQRYFKNITL | N-----     | -ILFDNKAHS | GKVKLSLDN- | ---VSG--HG  | DSYARVAFDV  | LVAVVCGLLC  | GSILKRGIMLY |
| TRPML2_Hsa | CKQHYKFRL  | E-----     | -IIFDNKAHS | GKIKIYFDS- | ---IFGSTQK  | NAQYVLVFDA  | EIVVICLALC  | TSIVLALRLF  |
| TRPML2_Mmu | CKQHYKFRL  | D-----     | -ITFDNKAHS | GKIKIYFDS- | ---ISGSTQK  | STHYLLVFDV  | EIVVICLALC  | TSIVLALRLF  |
| TRPML2_Dre | CKKSYKFFEL | D-----     | -IDFDNSCHS | GKMKLSLGF- | ---ISGTAQK  | NTLYLLIFDG  | EIVLVCILC   | TSIILAVKLF  |
| TRPML3_Hsa | CQHFYKNLTL | D-----     | -ITFDNKAHS | GRIKISLDN- | ---VSGSIQK  | NTHYMMIFDA  | EIVILTCLVLC | ISVIRGLQLF  |
| TRPML3_Mmu | CQHFYKNLTL | D-----     | -ITFDNKAHS | GRIKISLDN- | ---VSGSIQK  | NTHYMMIFDA  | EIVILTCLALC | ASVIRGLQLF  |
| TRPML3_Dre | CQHFYHNFTL | H-----     | -IQFDNKAHS | GRIVLDLND- | ---MTGASAR  | NMYMMVLEDA  | VVILLIISLTC | ISVKAGVLLF  |
| TRPML3_Dme | CLQNYRDVEV | N-----     | -ITFNDRHD  | GOMLLSLDA- | ---IS-DANF  | DSMLRSVLNI  | EIVLLTCALLC | TALWRAYLLF  |
| TRPML3_Dme | CLQNYRDVEV | N-----     | -ITFNDRHD  | GOMLLSLDA- | ---IS-DANF  | DSMLRSVLNI  | EIVLLTCALLC | TALWRAYLLF  |
| TRPML3_Cel | LIDRISFLPE | D-----     | -IKFDNSRHT | GOVHVTLST- | ---KGVGSF   | DTLLIGGTDI  | EIVLILCILL  | CALIKAHLLY  |
| TRPP_PKD1  | SIQANVRILM | RWAARSSANS | AVWHDNKGLS | PAWFLQHVIN | AVWSRAVFE   | LTRYSPAVGL  | VTLRL---TS  | -VCLLLEFAVH |
| TRPP_PKD1  | SIQANVRILM | RQAAQSSHNP | VVWHDNKGLS | PAWFLQHIIN | AVWSRAVFE   | LTRYSPAVGL  | VTLRL---TS  | -VCLLLEFALY |
| TRPP_PKD1  | AACLQLRILM | LTGAKAVLPP | ALWHDNKGLS | PAWLLQYVDA | AVWTRALFE   | ESLYNINTDL  | ESFLL---LT  | -LILLYLIIY  |
| TRPP_PKD2  | KECYDVGSSH | WATGYLDLSR | T-----REE  | TAAQVASLKK | NWVTRATFID  | ESVYANANINL | ECVVRLLVAC  | EIIIFCFIIY  |
| TRPP_PKD2  | KECYDVGSSH | WASGYLDLSR | T-----REE  | TAAQVAGLRR | NWVTRAAFID  | ESVYANANINL | ECVVRLLAAC  | EIIIFCFIIY  |
| TRPP_PKD2  | YDCYNVSESS | WSTGYQDLSR | T-----REK  | SANQLOELKN | NWVTRAVFLD  | ESIYNGNVNL  | ECIVRLLVMC  | EVSFCLFVLY  |
| TRPP_PKD2  | KECFANLKT  | VASGVQRLPV | A-----GSTE | AQSAIATKA  | NRWASRAIVD  | EALYANANINL | ECVVKLLFIF  | EGIFCGFIFY  |
| TRPP_PKD2L | LSCYDVGFSS | WTSGYLDLPG | S-----RQG  | SAEALRALQE | GLWTRVVVID  | ESVYANANINL | ECVLRLLVVG  | EIVFCVFIFY  |
| TRPP_PKD2L | LSCYDVGFSS | WTSGYLDLPG | S-----RQA  | SAEALQDLQE | GLWTRVVVID  | ESVYANANINL | ECVLRLLVVG  | EIVFCVFIFY  |
| TRPP_PKD2L | LNCYDVGSSH | WTSGYLDLPG | S-----RQA  | SAEALQDLQE | GLWTRVVVID  | ESVYANANINL | ECVLRLLVVG  | EIVFCVFIFY  |
| TRPP_PKD2L | SDCFDVGSSH | WTTGYQDLTT | T-----RDE  | SAALLEDRE  | NLWTRVLFID  | ETAYANANINL | ECVIRLVVGC  | EIVFCVFIFY  |
| TRPP_PKD2L | SECYKSPWH  | WGVNIETLSK | S-----KSE  | TKNKFIDLR  | NWVTRVIFID  | ESLYANANVNL | ECIIRLVASC  | EITFCIFLIV  |
| TRPP_PKD2L | SDCYKSPWH  | WGVDIETLSK | S-----KSE  | TKAKFVDLR  | NWVTRAVFID  | ESLYANANVNL | ECIIRLVASC  | EIVFCIFLIV  |
| TRPP_PKD2L | NTCYAASTPI | WAFTTVNLDY | D-----KDR  | NVKIINDLKD | IHWRSRLCIVE | ENLFNENTDI  | EQSILKIAVI  | YIFWYIMVIY  |
| Cca7050    | EISTGKRKFI | ATDAVQYELN | RVWRAAPTIR | YRVEAFAYVA | FLILLMVEKL  | EWITLAYVLA  | LLYNEFVTLV  | REGHFYFTRL  |
| Cca21784   | NISDRCKKFI | AHASVLQALK | RSWIAEPIII | YTAHVISYSV | FVVLILLIDGL | LLVIFIFVFG  | LILQEIRSFL  | RLERFYFSGL  |
| Cca260897  | THLLPES--- | ---RRQAARV | IAELKDNMWS | RVVFLDTFTY | NANINLFCVV  | KLIVFCEVVF  | CLFIYYIYVE  | EVLVLYLHRM  |
| Sla36613_6 | ---        | ---        | ---        | ---        | ---         | ---         | ---         | ---         |
| Sycon24227 | KMNKLECKD  | KELQRHNVR  | MLIYNKWEY  | GERMAILNCG | LYLLFMLCVT  | ESVLEVISLL  | GVMVNLYDEA  | KECYREKTAY  |
| Sycon24228 | NKKLECKDKE | LQRHNVRML  | IYNKWEYGE  | RMAILNLGHY | LLEMLCVTFS  | VLEVISLLGV  | MVNLYDEAKE  | CYREKTAYVT  |
| Sycon9763  | ---        | ---        | ---        | ---        | ---         | ---         | ---         | ---         |
| Ava16635_4 | HVTGRMCTFL | SHPCVQSLLD | EQWYTSPIK  | FITYVLAFFL | YLTLYSFV--  | EWIFIVWSLT  | YILEEVRQLF  | AGNSAYLNDR  |
| Ava9904_1  | KIKGDCKHFI | AHPLIQDYAN | QKWNAPKIK  | YWLHFLSHIV | YTILFTVII   | ELIVVWTF    | IIMEECSQLL  | HEKRGYISSA  |
| Ava7536_5  | -VQKRFELV  | LHPIFKKLE  | MKWRKYGFLF | AIQTVFYFT  | FWSLFTIHL-- | -FVCIALVLF  | QIVVEFTEIF  | EONNPTADF   |
| Ava6620_1  | ESTAGQLFF  | THEVQGHVR  | NVWYISPSTT | FYIHSLVYFI | FLVLYTVHFT  | DVIYFLYMA   | YILDEVFQIE  | EKTFEYLSG   |
| Cca31351   | E-----F    | SHTPMEKMT  | SVV-----   | FWLIPPTP-- | -VIYEKVVKI  | ELGDMVEKHL  | YEG-----    | ---         |
| Cca30979_3 | N-----NRSI | AGETISGLQE | SRWTRAVTVQ | FTVYNANSNL | FSIGLLLVAC  | EAAFVFFLFY  | YTVKAIRAH   | KVKGAFIVEP  |

Ava26193\_2 --ARSGYEEIV YHDTVRLLLR MKWKKFGRFR FLLQFLTYHL HLLAMSVSLC EIVYYVFLW NLAAEIFOMF RHRLRYLLDW  
Ava26160\_2 -----

|            |             |             |             |              |             |            |            |            |
|------------|-------------|-------------|-------------|--------------|-------------|------------|------------|------------|
| TRPC1_Hsap | MIWSDIKRLW  | YEGEDEFLEES | RNQLSFMVNS  | LYLATFALKV   | VATLVAEGLF  | AFANVLSYLR | LFYMYTSSI  | LGPLQISMGO |
| TRPC1_Mmus | WSDIKRLWYE  | GEDFLEESRN  | QLSFMVNSLY  | LATFALKVVA   | TLVAEGLFAF  | ANVLSYLR   | FMYTSSILG  | PLQISMGO   |
| TRPC1_Drer | MWSDVRLW    | YEGEDEFLEES | RNQLSFMVNS  | LYLATFALKI   | VATLVAEGLF  | AFANVLSYLR | LFYMYTSSI  | LGPLQISMGO |
| TRPC2_Mmus | FLWFECKEYV  | IEGRSYLLDW  | WNFLDVVILS  | LYLASFALRL   | LLQFLAEVLF  | AVTSMLSFR  | LAYILPAHES | LGTLOISIGK |
| TRPC2_Drer | FWFECKEYV   | IEGRSYFLDW  | WNCLDVMVLS  | MYLASFALRL   | VIQFISEVLF  | AVTSMLSFR  | LAYILPAHES | LGTLOISIGK |
| TRPC2_Drer | FWFECKEYV   | IEGKSYFLDL  | WNILDMMVLS  | MYLASFTLRI   | LIQLIAETLF  | AVTSMLSFR  | LAYILPAHES | LGTLOISMGR |
| TRPC3_Hsap | MWSECKELW   | LEGREYILQL  | WNVLDVGMLS  | IFATIAFTARF  | LQIIESEGLY  | ATAVLSFSR  | LAYILPANES | FGPLQISLGR |
| TRPC3_Mmus | WSECKELWLE  | GREYIVQLWN  | VLDVGMLSIF  | IAAFATARFLA  | QIIESEGLYAI | AVVLSFSRIA | YILPANESFG | PLQISLGR   |
| TRPC4_Hsap | FIWGEIKQMW  | DGGQDYIHDW  | WNLMDFVMNS  | LYLATISLKI   | VATLVAEALF  | ATANIFSRL  | LISLFTANSH | LGPLQISLGR |
| TRPC4_Mmus | FIWGEIKQMW  | DGGQDYIHDW  | WNLMDFVMNS  | LYLATISLKI   | VATLVAEALF  | ATANIFSRL  | LISLFTANSH | LGPLQISLGR |
| TRPC4_Drer | FIWTEIKQMW  | DGGQDYIHDW  | WNLMDFVMNS  | LYLATISLKI   | VATLVAEAVF  | ATANIFSRL  | LISLFTANSH | LGPLQISLGR |
| TRPC4_Dmel | LIWSEVKQLW  | DVGQEYLNDM  | WNVIDFVNTS  | LYVATVALRV   | VSMLESEGLF  | SAANIFSRLK | LVYIFSVNPH | LGPLQVSLSR |
| TRPC4_Cele | LIWVEIKQLW  | ECGYNYCRNL  | WNILDFITNS  | LYLCTTALRV   | VATLLSECF   | ATANIFSRLK | LVHIFTVSPH | LGPLKISLGR |
| TRPC5_Hsap | WGEIKEMWDG  | GTEYIHDWVN  | LMDFAMNSLY  | LATISLKI     | TLIAEALFAI  | SNILSSRLI  | SLFTANSHLG | PLQISLGRML |
| TRPC5_Mmus | WGEIKEMWDG  | GTEYIHDWVN  | LMDFAMNSLY  | LATISLKI     | TLIAEALFAI  | SNILSSRLI  | SLFTANSHLG | PLQISLGRML |
| TRPC6_Hsap | WAECKEIKWTQ | GKEYLFELWN  | MLDFGMLAIF  | AASFARFMA    | QIIESEGLYAI | AVVLSFSRIA | YILPANESFG | PLQISLGR   |
| TRPC6_Mmus | WAECKEIKWTQ | GKEYLFELWN  | MLDFGMLAIF  | AASFARFMA    | QIIESEGLYAI | AVVLSFSRIA | YILPANESFG | PLQISLGR   |
| TRPC6_Drer | MWAECKEIKW  | SQGREYLLEP  | WNLLDFGMLA  | IFVASFISRI   | MAQLVSEGLY  | ATAVLSFSR  | LAYILPANES | FGPLQISLGR |
| TRPC6_Drer | MIWAECKEIKW | SQGREYLLEP  | WNLLDFGMLA  | IFVASFISRI   | MAQLVSEGLY  | ATAVLSFSR  | LAYILPANES | FGPLQISLGR |
| TRPC6_Cele | MLWSEIKQLW  | EEGKRYMRQW  | WNWDLFIMIC  | LYLCTISIRL   | SAMLVAEALF  | AVGNVFSFR  | IYLFQTNPY  | LGPLQISLGC |
| TRPC7_Hsap | MWSECKEIKW  | EEGREYVHLH  | WNLLDFGMLA  | IFVASFTARF   | MAQIIESEGLY | ATAVLSFSR  | LAYILPANES | FGPLQISLGR |
| TRPC7_Mmus | WSECKEIKWEE | AGREYVHLWN  | LLDFGMLSIF  | VASFARFMA    | QIIESEGLYAI | AVVLSFSRIA | YILPANESFG | PLQISLGR   |
| TRPC7_Drer | MWSECKEIKW  | DREYIMHLL   | WNVLDVGMLS  | VVASFARL     | MAQIIESEGLY | ATAVLSFSR  | LAYILPANES | FGPLQISLGR |
| TRPN_Dmel  | LLLFEITNPS  | DKS-----G   | LGSIKVLLVLL | IGMAGVGVHV   | SAVYCRNQCF  | ALAFLLACVQ | ILDFLSFHHL | FGPWAIIGD  |
| TRPN_Cele  | NLVSELSTVG  | GGG-----G   | LGIVKVLILV  | ISAMAIHVH    | LALYLKQQLF  | AFALLFAFVE | YLDFLVHHL  | FGPWAIIRD  |
| TRPN_Drer  | MLVSELTFPG  | ERT-----G   | LAWIRLLLL   | FSAAALLCHL   | LALFARNVLL  | AVAMTLGFIQ | LELFITFHHL | FGPWAIIRD  |
| TRPM1_Hsap | LALEKIREIL  | MSEKWLQEY   | WNITDLVAIS  | FNITGAILRL   | QNMGYGRVYI  | CVDIIFWYIR | VLDIFGVNKY | LGPYVMMIGK |
| TRPM1_Mmus | LALEKIREIL  | MSEKWLQEY   | WNITDLVAIS  | MFVVGAILRL   | QSMGYGRVYI  | CVDIIFWYIR | VLDIFGVNKY | LGPYVMMIGK |
| TRPM2_Hsap | LVCEEMRQLF  | YDPALYFSD   | WNKLDVGAII  | IFVAGLTCRL   | IPLYPGRVIL  | SLDFILFCLR | LMHIFTISKT | LGPKIIVKR  |
| TRPM2_Mmus | LVCEETRQLF  | YDPSLYFSD   | WNKLDVGAII  | IFVAGLTCRL   | IPLYPGRVIL  | SLDFILFCLR | LMHIFTISKT | LGPKIIVKR  |
| TRPM3_Hsap | LGIEKMRILE  | MSEKWLQEY   | WNVTDLIAIL  | IFSVGMILRL   | QDRSDGRVYI  | CVNIIYWYIR | LLDIFGVNKY | LGPYVMMIGK |
| TRPM3_Mmus | LGIEKMRILE  | MSEKWLQEY   | WNVTDLIAIL  | IFSVGMILRL   | QDRSDGRVYI  | CVNIIYWYIR | LLDIFGVNKY | LGPYVMMIGK |
| TRPM3_Drer | NGIEKMRILE  | MSEKWLQEY   | WNITDLMAIL  | IFSVGMILRL   | QDRSDGRVYI  | CVNIIYWYIR | LLDIFGVNKY | LGPYVMMIGK |
| TRPM3_Dmel | LGFEKVRKII  | SSDSVAVWMM  | WNPCDGAII   | IFVIGLAFRL   | REMDIGRVYI  | CVDSIYWYLR | LLNLSVNHK  | LGPEVMMIGK |
| TRPM3_Cele | FGLEQVRKII  | MSDRVAVCSF  | WNCVTLIAII  | FYIIVGFMR    | FGVAYGRVIL  | ACDSVLTWMK | LLDYMVSHPK | LGPEVMMIGK |
| TRPM3_Cele | LEIGRKIMMD  | TRVFFQYRN   | GLLAFGLLTY  | LIAYFIRLSP   | KTIGRILIC   | NSVIWSLKL  | DYLSVQQGLG | PYINIYAEMI |
| TRPM3_Cele | VEHIRKIMTS  | EKVYAKWYN   | IWTSALLFF   | IVGYGFRVLP   | HSWGRVLLSF  | SNVLFYMKIF | EYLSVHPLL  | PYIQAAMKV  |
| TRPM4_Hsap | LLCEELRQGL  | SGGRLYLADS  | WNQCDLVALT  | CFLLVGVGCR   | TPYHLGRVTL  | CIDFMVFTVR | LLHIFTVNKQ | LGPKIVIVSK |
| TRPM4_Mmus | LLCEELRQGL  | GGGHLYLSDT  | WNQCDLLALT  | CFLLVGVGCR   | TPFDLGRVTL  | CIDFMVFTVR | LLHIFTVNKQ | LGPKIVIVSK |
| TRPM4_Drer | LVCEEIQEAS  | IAGIYVYQDM  | WNKFDVLAIC  | IFFIAGLCCRM  | FSPNMGRGIL  | CVDMVFTLR  | LIHIFAIHKE | LGPKIIVLGR |
| TRPM4_Drer | LVCEEIREAS  | IAGFVYVQDM  | WNKFDVLAIS  | IFFIAGLCCRM  | FSPNMGRGIL  | CVDMVFTLR  | LIHIFAIHKE | LGPKIIVLGR |
| TRPM4_Drer | LVCQEIQEAF  | IAGFVYVQDM  | WNKFDVLAIS  | IFFIAGLCCRM  | FSPNMGRGIL  | CVDMVFTLR  | LIYIFAIHKE | LGPKIIVLGR |
| TRPM4_Drer | LACEEIQRF   | FVGKVIYQDI  | WNKCDITVAL  | IFFIAGLCCRM  | FSPNMGRVIA  | CVDMVFTLR  | LIHIFAVHKE | LGPKIIVVGR |
| TRPM5_Hsap | LVLEEIRQGF  | FTDITLYVDN  | WNKCDMVAIF  | IFVIGVTCRM   | LPFEAGRTVL  | AMDPMVFTLR | LIHIFAIHKE | LGPKIIVVER |
| TRPM5_Mmus | LVLEEIRQGF  | FTDITLYVDN  | WNKCDMVAIF  | IFVIGVTCRM   | VPFEAGRTVL  | AIDPMVFTLR | LIHIFAIHKE | LGPKIIVVER |
| TRPM5_Drer | LVLEEIRQSF  | FTDITLYVDN  | WNKCDMVAIS  | IFVIGVTCRM   | VPFEAGRTVL  | AIDPMVFTLR | LIHIFAIHKE | LGPKIIVVER |
| TRPM6_Hsap | NAIEKVRREIC | ISEKMWISY   | WNLTETVAIS  | IFVAGVFLRW   | GDHTAGRLIY  | CIDIIWFVSR | LLDFFAVNHQ | AGPYVMMIAK |
| TRPM6_Mmus | NAIEKVRREIC | ISEKMWISY   | WNLTETVAIS  | IFVAGVFLRW   | GQHTAGRLIY  | CIDIIWFVSR | LLDFFAVNHQ | AGPYVMMIAK |
| TRPM7_Hsap | YAEKVRREIF  | MSEKWFSDY   | FNISDTIAII  | SFFVGFGLRF   | GAFVAGRLIY  | CLNIIWFVVR | LLDFFAVNHQ | AGPYVMMIAK |
| TRPM7_Mmus | YAEKVRREIF  | MSEKWFSDY   | FNISDTIAII  | SFFVGFGLRF   | GAFVAGRLIY  | CLNIIWFVVR | LLDFFAVNHQ | AGPYVMMIAK |
| TRPM7_Drer | LAVEKIREMF  | MSEKWFSDY   | FNISDFLAIL  | MFVVGFLRL    | VFSIAGRIVY  | CLNIIWFVVR | LLDFFAVNHQ | AGPYVMMIAK |
| TRPM8_Hsap | LFCDEVRQWY  | VNGVNYFTDL  | WNVMDTLGLF  | YFIAGIVFRL   | HSLSYGRVIF  | CLDYIIFTLR | LIHIFTVSRN | LGPKIIMLGR |
| TRPM8_Mmus | LFCDEVRQWY  | MNGVNYFTDL  | WNVMDTLGLF  | YFIAGIVFRL   | HSLSYGRVIF  | CLDYIIFTLR | LIHIFTVSRN | LGPKIIMLGR |
| TRPA_Hsap  | YCKEAGQIFQ  | QKRNYFMDIS  | NVLEWIIYTT  | GIIFVLP---   | --HLQWQCGA  | IAVYFYWMNF | LLYLQRFENC | GIFVLMLEVI |
| TRPA_Mmus  | YCKEVIQIFQ  | QKRNYFLDYN  | NALEWIIYTT  | SIIFVLP---   | --YMQWQCGA  | IAVYFYWMNF | LLYLQRFENC | GIFVLMLEVI |
| TRPA_Drer  | AVGKEILQMF  | QORLNYLRLD  | SNYMDWAAAI  | CALLFVVPLR   | ---SWHWQAG  | ALAALTSWLN | LLYLQRFER  | IGIYVVMFRE |
| TRPA_Drer  | SICKEVQVLA  | QQRVNYFTDF  | SNPADWSAAI  | SALFVVVPM--- | ---TWQWEAG  | AYAILTSWIG | FLLYFQRFER | IGIYVVMFRE |
| TRPA_Dmel  | NSMRELIQIY  | QOKLHYILET  | VNLISWVLYI  | SALVMVTPA--- | ---NTIHYSAA | SIAVFLSWFR | LLLFLQRFDF | VGIYVVMFRE |
| TRPA_Cele  | LVCEFLQFOR  | KFAYLNVNEN  | WIDCFIYSTA  | ITIVYDFSEC   | SNHQWILAAL  | CIFFGWINLL | FMIRKMPRFQ | IFVVMFVDIV |
| TRPV1_Hsap | FFFRGIQYFL  | QRRSLFVDSY  | SEMLFFVQSL  | FMLATVVLYF   | SHLKEYVASM  | VFSLAMGWTN | MLYYTRGFQQ | MGIYAVMIEK |
| TRPV1_Mmus | FFFRGIQYFL  | QRRSLFVDSY  | SEMLFFVQSL  | FMLVSVVLYF   | SHRKEYVASM  | VFSLAMGWTN | MLYYTRGFQQ | MGIYAVMIEK |
| TRPV1_Drer | FFIRGLIDMV  | RKRSLIIDGY  | TDQLFFVQGL  | FFLASVVLYC   | YGQYEYLAFL  | VLCLALSWIN | LLYFTRGSKN | LGIVNVMIEK |
| TRPV2_Hsap | LLVQQLWYFV  | RRHISFIDS   | FEILFLQAL   | IFTVVSQVLCF  | LAIEWYLPPL  | VSAVLGWLN  | LLYYTRGFQQ | TGIYSVMIEK |
| TRPV2_Mmus | LLLGQLWYFV  | RRHISFIDS   | FEILFLQAL   | IFTVVSQVLCF  | LAIEWYLPPL  | VSAVLGWLN  | LLYYTRGFQQ | TGIYSVMIEK |
| TRPV3_Hsap | ISVKEGIAIF  | LLRSILSDAW  | FHFVFFVQAV  | IFVILSVFLYL  | FAYKEYLAFL  | VLAALGWAN  | MLYYTRGFQS | MGIYSVMIEK |
| TRPV3_Mmus | ISVKEGIAIF  | LLRSILSDAW  | FHFVFFVQAV  | IFVILSVFLYL  | FAYKEYLAFL  | VLAALGWAN  | MLYYTRGFQS | MGIYSVMIEK |
| TRPV4_Hsap | FFFTNIKDLF  | MKKSFLIDGS  | FQLLYFIYSV  | IFVIVSAALYL  | AGIEAYLAVM  | VFALVLGWMN | ALYFTRGLKL | TGTYSIMIEK |
| TRPV4_Clup | FFFTNIKDLF  | MKKSFLIDGS  | FQLLYFIYSV  | IFVIVSAALYL  | AGIEAYLAVM  | VFALVLGWMN | ALYFTRGLKL | TGTYSIMIEK |
| TRPV4_Mmus | FFFTSIKDLF  | TKKSFLVDSG  | FQLLYFIYSV  | IFVVSAALYL   | AGIEAYLAVM  | VFALVLGWMN | ALYFTRGLKL | TGTYSIMIEK |
| TRPV4_Drer | FFVTNIKDLF  | LKKSFLVDSG  | FQLLYFIYSV  | IFVVGSAALYL  | SGIEAYVAVM  | VFALVLGWMN | PLYFTRGLKL | TGTYSIMIEK |
| TRPV5_Hsap | ILLLEIPDIF  | RVGKTLGGP   | FHVIIITYAS  | IFVLTVMVRL   | TNTNVEGVPM  | SFALVLGWCN | VMYFTRGFQM | LGPFITMIEK |
| TRPV5_Mmus | ILLLEIPDIF  | RVGKTLGGP   | FHVIIITYAS  | IFVLTVMVRL   | TNTNVEGVPM  | SFALVLGWCN | VMYFTRGFQM | LGPFITMIEK |
| TRPV6_Hsap | ILLVEIPDIF  | RMGQTLGGP   | FHVIIITYAF  | MVLVTVMVRL   | ISASGEVPM   | SFALVLGWCN | VMYFARGFQM | LGPFITMIEK |
| TRPV6_Mmus | ILLVEIPDIF  | RLGQTLGGP   | FHVIIITYAF  | MVLVTVMVRL   | TNVDEGVPM   | SFALVLGWCN | VMYFARGFQM | LGPFITMIEK |





|            |             |             |             |             |             |             |             |             |
|------------|-------------|-------------|-------------|-------------|-------------|-------------|-------------|-------------|
| TRPM3_Cele | MTIQNSYIIV  | MLVVTLLSFG  | LARQSYTPYD  | THWILVRNIF  | LKPYFMLYGE  | VYADEIDPGY  | WIPPLIMTFF  | LLIANILIMS  |
| TRPM3_Cele | PTMIPLCVLV  | FITLYAFGLL  | RQSYTPYDHD  | WILVRNIFLQ  | PYFMLYGEVY  | AAEIDPGYWI  | APVGLTVFML  | ATNVLLMNMV  |
| TRPM3_Cele | WSMCYICVLL  | LVPLMAFGVN  | RQALTEPNKH  | WLLVRNIFYK  | PYFMLYGEVY  | AGEIDPGYFI  | PPLLMVIFLL  | VANILLLNLL  |
| TRPM4_Hsap | MMKDVFFLFL  | FLGVWLVAYG  | VATEGILLRP  | DFPSILRRVF  | YRPLYQIFGQ  | IPQEDMDYAN  | WLVLVLLVIF  | LLVANILLVN  |
| TRPM4_Mmus | MMKDVFFLFL  | FLCVWLVAYG  | VATEGILLRP  | DLPSILRRVF  | YRPLYQIFGQ  | IPQEMDYAN   | WLVLVLLVIF  | LLVANILLVN  |
| TRPM4_Drer | MKDAFFLFL   | FLLVWLVAYG  | VANQALLYQY  | DPARVFRRLV  | YRPLYLHIFGQ | IPVEEIDSHN  | WLVVVLLVIF  | LLVTNILLVN  |
| TRPM4_Drer | MKDAFFLFL   | FLLVWLVAYG  | VANQALLYQY  | DPARTFRRVL  | YRPLYLHIFGQ | IPVEEIDSHN  | WLVVVLLVIF  | LLVTNILLVN  |
| TRPM4_Drer | MKDAFFLFL   | FLLVWLVAYG  | VANQALLYQY  | DPARVFRRLV  | YRPLYLHIFGQ | IPVEEIDSHN  | WLVVVLLVIF  | LLVTNILLVN  |
| TRPM4_Drer | MKDAFFLFL   | FLLVWLVAYG  | VANQALLYQY  | DPARVFRRLV  | YRPLYLHIFGQ | IPVEEIDSHN  | WLVVVLLVIF  | LLVTNILLVN  |
| TRPM4_Drer | MKDAFFLFL   | FLLVWLVAYG  | VANQALLYQY  | DPARVFRRLV  | YRPLYLHIFGQ | IPVEEIDSHN  | WLVVVLLVIF  | LLVTNILLVN  |
| TRPM4_Drer | MKDAFFLFL   | FLLVWLVAYG  | VANQALLYQY  | DPARVFRRLV  | YRPLYLHIFGQ | IPVEEIDSHN  | WLVVVLLVIF  | LLVTNILLVN  |
| TRPM5_Hsap | MMKDVFFLFL  | FLSVWLVAYG  | VTTQALLHPH  | DLEWIFRRVL  | YRPLYQIFGQ  | IPLEDEIDYAN | WLVLVLLVTF  | LLVTNVLLMN  |
| TRPM5_Mmus | MMKDVFFLFL  | FLSVWLVAYG  | VTTQALLHPH  | DLEWIFRRVL  | YRPLYQIFGQ  | IPLEDEIDYAN | WLVLVLLVTF  | LLVTNVLLMN  |
| TRPM5_Drer | MKDVFFLFL   | FLSVWLVAYG  | VTTQALLHPH  | DIDVFFRRAL  | YRPLYLHIFGQ | IPLEEIDYAN  | WLVLVLLVTF  | LLVTNVLLMN  |
| TRPM6_Hsap | MTANMFYIVI  | IMAVLLSFG   | VARKAILSPK  | ESWSLARDIV  | FEPYWMYIGE  | VYAGEIDPGS  | FLTPFLQAVY  | LFVQYIIMVN  |
| TRPM6_Mmus | MAANMFYIVI  | IMAVLLSFG   | VARKAILSPK  | ESWRSLARDIV | FEPYWMYIGE  | VYASDIDPGS  | FLTPFLQAVY  | LFVQYIIMVN  |
| TRPM7_Hsap | MVANMFYIVV  | IMALVLLSFG  | VPRKAILYPH  | ESWTLAKDIV  | FHPYWMIFGE  | VYAYEIDPGT  | WLTPFLQAVY  | LFVQYIIMVN  |
| TRPM7_Mmus | MVANMFYIVV  | IMALVLLSFG  | VPRKAILYPH  | ESWSLAKDIV  | FHPYWMIFGE  | VYAYEIDPGT  | WLTPFLQAVY  | LFVQYIIMVN  |
| TRPM7_Drer | MVANMFYIVV  | IMAVLLSFG   | VPRKAILYPH  | ESWTLAKDIV  | FQPYWMMYGE  | VYAYEIDTGV  | WLTPPLQAVY  | LFVQYIIMVN  |
| TRPM8_Hsap | MLIDVFFLFL  | LFAVWLVAYG  | VARQILLRQN  | ERWIFRRVLI  | YRPLYLHIFGQ | IPVEEIDSHN  | WLVVVLLVIF  | LLVTNILLVN  |
| TRPM8_Mmus | MLIDVFFLFL  | LFAVWLVAYG  | VARQILLRQN  | ERWIFRRVLI  | YRPLYLHIFGQ | IPVEEIDSHN  | WLVVVLLVIF  | LLVTNILLVN  |
| TRPA_Hsap  | LKTLRSTVV   | FIFLLAFGL   | SFYILLN---  | PFSSPLLSII  | QTFSMMLGDI  | NYRESFAHPV  | LSPAQLVSFT  | IFVPIVLMNL  |
| TRPA_Mmus  | FKTLRSTGV   | FIFLLAFGL   | SFYVLLN---  | AFSTPLLSLI  | QTFSMMLGDI  | NYRDAFAPV   | LTFGQLIAFT  | MFPVIVLMNL  |
| TRPA_Drer  | ISRTLRSIIIV | LFSVLLGFA   | LSFYALMI--  | -HFGRMFLSL  | LQTFVMMVYGE | MNYQDNFPPF  | DLTLALFVWF  | VLLTPIVLMN  |
| TRPA_Drer  | IVRTLVCIMV  | LFVFLLLAFG  | LAFYALML--  | -EFSSISLAL  | AQTFVMTVGE  | LNQSTFAFP   | AITYFVVFVF  | VLLMPLVLMN  |
| TRPA_Dmel  | LLQTLIKVLM  | VFSILLIAFG  | LAFYILLSKI  | DSFENIPMSL  | LRFVSMMLGE  | LDFVGTYPKVP | MTSFLLLSVF  | MILMPLVLMN  |
| TRPA_Cele  | KTFRRFFPVF  | VLFIIFAFSS  | FYVILQ---E  | FSTIFMSPLK  | TTVMMIGEFE  | FTGIFAHTAV  | ACALFFFCCY  | IMTILLMNL   |
| TRPV1_Hsap | MIRDLCREMF  | YVIVFLFGFS  | TAVVTLIEDG  | NSYNSLYSTC  | LELEKFTICM  | GDLEFTEDFK  | AVFIILLLAY  | VILTYIILLN  |
| TRPV1_Mmus | MIRDLCREMF  | YVIVFLFGFS  | TAVVTLIEDG  | NSYNSLYSTC  | LELEKFTICM  | GDLEFTEDFK  | AVFIILLLAY  | VILTYIILLN  |
| TRPV1_Drer | MYGEIRRELV  | YVMVFLIGFS  | AALVLLDQE   | ISYKNIYFTT  | LELEKFTICM  | GDLEFTDKYK  | EVFVYLLIVY  | IVMTYIILLN  |
| TRPV2_Hsap | VIRDLLRELL  | IYLVFLFGFA  | VALVSLSQEA  | ROYRGILEAS  | LELEKFTICM  | GELAFQEHFR  | GMVLLLLLAY  | VLLTYIILLN  |
| TRPV2_Mmus | VIRDLLRELL  | IYLVFLFGFA  | VALVSLSQEA  | SPRYGILDAS  | LELEKFTICM  | GELAFQERFR  | GVLVLLLLAY  | VLLTYIILLN  |
| TRPV3_Hsap | VIHDVLRFLF  | YVIVFLFGFG  | VALASLIEK   | KSYGSFSDAV  | LELEKFTICM  | GDLNIQKQYP  | ILFLFLLITY  | VILTFVILLN  |
| TRPV3_Mmus | VIHDVLRFLF  | YVIVFLFGFG  | VALASLIEK   | KSYGSFSDAV  | LELEKFTICM  | GDLNIQKQYP  | ILFLFLLITY  | VILTFVILLN  |
| TRPV4_Hsap | ILKDLFRELL  | YVLLFMIGYA  | SALVSLNCP   | NDSETFSTFL  | LDEKFTICM   | GDLEMLSKYP  | VVFILLLVTY  | IILTFVILLN  |
| TRPV4_Clup | ILKDLFRELL  | YVLLFMIGYA  | SALVSLNCP   | NDSETFSTFL  | LDEKFTICM   | GDLEMLSKYP  | VVFILLLVTY  | IILTFVILLN  |
| TRPV4_Mmus | ILKDLFRELL  | YVLLFMIGYA  | SALVSLNCP   | NDSETFSAFL  | LDEKFTICM   | GDLEMLSKYP  | VVFILLLVTY  | IILTFVILLN  |
| TRPV4_Drer | ILKDLFRELL  | YVLLFMIGYA  | SALVSLNCP   | NDNTNFSEFL  | LDEKFTICM   | GDLEMLSKYP  | VVFILLLVTY  | IILTFVILLN  |
| TRPV5_Hsap | MIGDLMRECW  | LMAVVILGFA  | SAFYIIFQTE  | PQFYDYPMAL  | FTSPELFTI   | IDAPNYDDL   | FMFSYVNFAT  | AIITATLLMN  |
| TRPV5_Mmus | MIGDLMRECW  | LMAMVILGFA  | SAFYIIFQTE  | PEFSYDPTAM  | FTSPELFTI   | IDGPNYRDL   | FMFSYVNFAT  | AIITATLLMN  |
| TRPV6_Hsap | MIGDLMRECW  | LMAVVILGFA  | SAFYIIFQTE  | PHFYDYPMAL  | FSTPELFTI   | IDGPNYDDL   | FMFSYVNFAT  | AIITATLLMN  |
| TRPV6_Mmus | MIGDLMRECW  | LMAMVILGFA  | SAFYIIFQTE  | PHFYDYPMAL  | FSTPELFTI   | IDGPNYDDL   | FMFSYVNFAT  | AIITATLLMN  |
| TRPV6_Drer | SIGDITRQMV  | LSIIFLIGSS  | AALWIFYMTQ  | PQYRSFPITL  | FSQREVSQVQ  | IDLPDHTFTH  | PVVYVTHVCF  | SLISNVLLFN  |
| TRPML1_Hsa | ALPSVMRECC  | CVAVIYLGYC  | FCGWIVLGPY  | VKFRSLMVS   | ECLESLVNGD  | DMFVTFALVW  | LFSQLYLYSF  | ISLFIYMLVS  |
| TRPML1_Mmu | ALPSVMRECC  | CVAVIYLGYC  | FCGWIVLGPY  | VKFRSLMVS   | ECLESLVNGD  | DMFVTFALVW  | LFSQLYLYSF  | ISLFIYMLVS  |
| TRPML1_Dre | AFPNVIRECC  | CAAAIYMGYC  | FCGWIVLGPY  | AKFRSLSTVS  | ECLESLVNGD  | DMFATFSLVW  | VFSQIYLYTF  | ISLFIYMLVS  |
| TRPML2_Hsa | SLPKVLRCA   | CAGMIYLGYT  | FCGWIVLGPY  | DKFENLNTVA  | ECLESLVNGD  | DMFATFALVW  | LFSRLYLYSF  | ISLFIYMLVS  |
| TRPML2_Mmu | SLPKVLRCA   | CAGMIYLGYT  | FCGWIVLGPY  | EKFENLNIVA  | ECLESLVNGD  | DMFATFALVW  | LFSRLYLYSF  | ISLFIYMLVS  |
| TRPML2_Dre | ALPKVLRCA   | CAGMIYLGYT  | FCGWIVLGPY  | EKFEDLSRVA  | ECLESLVNGD  | DMFATFAMVW  | LFSRVLYLYSF | ISLFIYMLVS  |
| TRPML3_Hsa | ALPNVIRECC  | CAAAIYMGYC  | FCGWIVLGPY  | DKFRSLNMVS  | ECLESLVNGD  | DMFATFALVW  | LFSRIYLYSF  | ISLFIYMLVS  |
| TRPML3_Mmu | ALPNVIRECC  | CAAAIYMGYC  | FCGWIVLGPY  | EKFRSLNRVS  | ECLESLVNGD  | DMFSTFALVW  | LFSRVLYLYSF | ISLFIYMLVS  |
| TRPML3_Dre | ALPNVIRECC  | CAAAIYMGYC  | FCGWIVLGPY  | TKFRTLNTVS  | ESLESLVNGD  | DMFATFKVWV  | LFSRLYLYTF  | VSLFIYMLVS  |
| TRPML3_Dme | AAPKILRELI  | AALLIYAGFV  | FCGWIVLGPY  | MKFRSLATTS  | ECLESLVNGD  | DMFATFAWLW  | WFCQIYLYSF  | ISLYIYVVS   |
| TRPML3_Dme | AAPKILRELI  | AALLIYAGFV  | FCGWIVLGPY  | MKFRSLATTS  | ECLESLVNGD  | DMFATFAWLW  | WFCQIYLYSF  | ISLYIYVVS   |
| TRPML3_Ce1 | SAPNIMREMT  | CAIYVYAGFL  | IAGWVYIGPY  | MKFRSLAESS  | EALLESLLNG  | DMFATFYVIK  | VFGTVYIYLF  | VSLFYVVS    |
| TRPP_PKD1  | ALPELLGVTL  | GLVLGVVAYG  | QLAILLVSSC  | D-----SLVSW | AQAL--LVLC  | -----LSP    | LLC----VGL  | WALRWGALR   |
| TRPP_PKD1  | ALPELLGVTL  | GLVLGVVAYG  | QLAILLVSSC  | D-----LYNMA | ARA---LVLC  | -----LSP    | LLC----VGL  | WALRWGALR   |
| TRPP_PKD1  | SFWELLMVAV  | TLLVFLVAYS  | HTGHLLFHSV  | E----GYGTV  | SSTCFKLI    | -----PCS    | GSCFIYISF   | TLLRVLVLI   |
| TRPP_PKD2  | CAKDLFGFAI  | MFFIIFLAYA  | QLAYLVFGTQ  | DDFSTFOECI  | FTQRIILGD   | INFAEIEANR  | VLGPIYFTTF  | VFFMFVILLN  |
| TRPP_PKD2  | CAKDLFGFAI  | MFFIIFLAYA  | QLAYLVFGTQ  | DDFSTFOECI  | FTQRIILGD   | INFAEIEANR  | VLGPIYFTTF  | VFFMFVILLN  |
| TRPP_PKD2  | CAKDLFGFAI  | MFFIIFLAYA  | QLAYLVFGTQ  | DDFSTFOACI  | FTQRIILGD   | FDSEIEADS   | VLGPIYFTTF  | VFFMFVILLN  |
| TRPP_PKD2  | SAKDILGFAV  | MFAVFFFAFA  | QFGYLCFQGT  | ADYSNLYNSA  | FALLRLILGD  | FNFSALECNR  | FFGPAFFIAY  | VFFVSVILLN  |
| TRPP_PKD2L | CAKDLGFAV   | MFFIIFLAYA  | QLAYLVFGTQ  | ENFSTFIKCI  | FTQRIILGD   | FDYNAIDANR  | ILGPAYFVTY  | VFFVFFVILLN |
| TRPP_PKD2L | CAKDLGFAV   | MFFIIFLAYA  | QLAYLVFGTQ  | ENFSTFIKCI  | FTQRIILGD   | FDYNAIDANR  | ILGPAYFVTY  | VFFVFFVILLN |
| TRPP_PKD2L | CAKDLGFAV   | MFFIIFLAYA  | QLAYLVFGTQ  | ENFSTFVKCI  | FTQRIILGD   | FDYNAIDANR  | ILGPAYFVTY  | VFFVFFVILLN |
| TRPP_PKD2L | CAKDLGFAV   | MFFIIFLAYA  | QLAYLVFGTQ  | ETESTFNKCI  | FTQRIILGD   | FDYDAIDANR  | VLGPIYFFSY  | VFFVFFVILLN |
| TRPP_PKD2L | CAKDLGFAV   | MFFIIFLAYA  | QLAYLVFGTQ  | DDFSTFQNSI  | FAQRIIVLGD  | FNFAIQANP   | ILGPIYFITE  | IFFVFFVILLN |
| TRPP_PKD2L | CAKDLGFAV   | MFFIIFLAYA  | QLAYLVFGTQ  | DDFSTFQNSI  | FAQRIIVLGD  | FNFAIQANP   | ILGPIYFITE  | IFFVFFVILLN |
| TRPP_PKD2L | CAKDLGFAV   | MFFIIFLAYA  | QLAYLVFGTQ  | DDFSTFQNSI  | FAQRIIVLGD  | FNFAIQANP   | ILGPIYFITE  | IFFVFFVILLN |
| TRPP_PKD2L | CAKDLGFAV   | MFFIIFLAYA  | QLAYLVFGTQ  | PDEFNFNTSI  | LTMIRMILGD  | FQNLEIANR   | VLGPIYFTFY  | ILLVFFVILLN |
| Cca7050    | SGLVNIYGAT  | FGFESMOSSA  | QSLFWSLFLG  | LDVGDLSSEA  | TAGKIVFLGW  | LLQAMILLN   | MLIALVTNKF  | DEFQSNADTE  |
| Cca21784   | AGITNVYRGT  | FDGSGYWISG  | ASLFWALFGL  | LERQDMEAE   | TAGQITMAVW  | LVSSVILLN   | MLIAVVTNKF  | DEVEENADTE  |
| Cca260897  | VFFAFALQGY  | LVFQAQRDFS  | TFGDSVFTLF  | RIILGDFDFI  | ALEANRILCP  | IFFVTVYVFFV | FFVLLNMFLA  | IINDTYGEVK  |
| Sla36613_6 | MFAFLFGTQ   | AVGASFGSTI  | TSLFLFVYGT  | YDFESMQAQF  | TLGPFVFFLF  | IFIVFFGLQA  | MFLTIIIEAF  | ETVRTDVKQK  |
| Sycon24227 | LTYAGSIFLA  | LARGEVELGLN | HFTSNYGFIL  | VTGLMIQOSI  | VFSWLVGIVI  | NMLFLFVVLV  | VLLNILLIAQL | SDTYADVKAQ  |
| Sycon24228 | YAGSLFLALR  | GEVELGLNHF  | TSNYGFILVT  | GLMIQOSIIV  | FWSLVGIVNM  | FLFFVVLVVL  | LNILLIAQLSD | TYADVKAQ    |
| Sycon9763  | SGVTHAVNE   | APFEFFSYADT | FYVFLFRAIG  | ITEFSSSTYPV | PGWVAFFCI   | YVVLGFLLLI  | QLLIAQMNAT  | HQREKADREA  |
| Ava16635_4 | VASQTIILYPN | YAFVFGNIF   | FRPYVQVLFGE | FFLEHIOQSN  | FGVYFFLVCI  | WLVVILLNIN  | I IIAKFNNTF | VERIESNAIY  |
| Ava9904_1  | AAMQAVVAD   | LAQFLFTIF   | FRPYVQVLFGE | FFLPQLGTRH  | PLPYFILLALW | LIFSNNVLLN  | LLIAKFNNTF  | LIVEAKSSIL  |
| Ava7536_5  | IGVWVIYQFQ  | RDENTFYSTV  | FTVFRIIVID  | -----TDE    | WMTYFIIIGSY | ISIVSIVSLN  | LFIALLSNTF  | QTVYDNKAT   |

|            |             |            |            |            |            |            |            |            |
|------------|-------------|------------|------------|------------|------------|------------|------------|------------|
| Ava6620_1  | IIIEVTLTSTN | NGWNLLRILL | FSPYYQIFGE | FGLANIRSTT | FIAYVFLIIL | QLIANVLLLN | LMIAYFTKIF | NEISENADSI |
| Cca31351   | LSQYA-----  | -----EHVEM | FGLLSDNDGW | DELSAIDAVH | PTGINQLSMY | EIRGLLSLVE | LLVKMLLRGY | NIQYNYMSTV |
| Cca30979_3 | SLHMGVFGAS  | YRFSSMFSAL | OYQIEMILGK | FEANRSRDYP | IAAPLIFIMF | VLTGAMLLSN | LFIVLINETF | SAVKRDNQTK |
| Ava26193_2 | GATYLALKFE  | VASSLTYLVS | EWVWFVFNGL | VIESPVFGFG | WFSLILHATF | LEFVIVVFLN | LIIAQMSDTY | QNVWSDAQRK |
| Ava26160_2 | IGVWVIYQFQ  | RDFNTFYSTV | FTVFRIVVID | -----TDE   | WMTYFIIGSY | ISIVSIVSLN | LFIALLSNTF | QTVYDNSKAT |

|            |            |             |            |            |      |
|------------|------------|-------------|------------|------------|------|
| TRPC1_Hsap | LLVAMLHKSF | QLIANHEDKE  | WKFARAKLWL | SYFDDKLRNE | TRDL |
| TRPC1_Mmus | VAMLHKSFQL | IANHEDKEWK  | FARAKLWLSY | FDDKLRNEIR | DL   |
| TRPC1_Drer | LLVAMLHKSF | ROIANHEDKE  | WKFARAKLWL | SYFDDKLRNE | MRDL |
| TRPC2_Mmus | MLIAMITNSF | QKIEDDADVE  | WKFARSKLYL | SYFREGVQSE | VASV |
| TRPC2_Drer | MLIAMITNSF | QKIEDDADVE  | WKFARSKLYL | SYFREGIHTE | MKQI |
| TRPC2_Drer | MLIAMISNSF | QRIEDDADVE  | WKFARSKLYL | SYFREGVHTE | MKDF |
| TRPC3_Hsap | MLIAMINSSY | QEIEDDSVVE  | WKFARSKLWL | SYFDDGIRYE | LLED |
| TRPC3_Mmus | IAMINSSYQE | IEDDSVVEWK  | FARSKLWLSY | FDDGIRYELL | ED   |
| TRPC4_Hsap | MLIAMMNNSY | QLIADHADIE  | WKFARTKLWM | SYFEEGIRFE | VLGL |
| TRPC4_Mmus | MLIAMMNNSY | QLIADHADIE  | WKFARTKLWM | SYFEEGIRFE | VLGL |
| TRPC4_Drer | MLIAMMNNSY | QHIADHADIE  | WKFARTKLWM | SYFEEGIRYE | VIGM |
| TRPC4_Dmel | MLIAMMNNSY | QLISERADVE  | WKFARSKLWI | SYFEEGIRCE | LVEI |
| TRPC4_Cele | MLIAMMSNSY | QYISDQADIE  | WKFARSRLFL | EYFDDTL--- | ---- |
| TRPC5_Hsap | IAMMNNSYQL | IADHADIEWK  | FARTKLWMSY | FDEGIRYEVL | DL   |
| TRPC5_Mmus | IAMMNNSYQL | IADHADIEWK  | FARTKLWMSY | FDEGIRYEVL | DL   |
| TRPC6_Hsap | IAMINSSFQE | IEDDADVEWK  | FARAKLWFSY | FEEGIRYELL | EE   |
| TRPC6_Mmus | IAMINSSFQE | IEDDADVEWK  | FARAKLWFSY | FEEGIRYELL | EE   |
| TRPC6_Drer | MLIAMINNSF | QEIEDDADVE  | WKFARAKLWF | TYFEEGIRYE | LLEE |
| TRPC6_Drer | MLIAMINNSF | QEIEDDADVE  | WKFARAKLWF | SYFEEGIRFE | LLEE |
| TRPC6_Cele | MLIAMMSHSF | QIINDHADLE  | WKFHRTKLWM | AHFDEGIRYE | LRDD |
| TRPC7_Hsap | MLIAMINNSY | QEIEEDADVE  | WKFARAKLWL | SYFDEGIRYE | LLEE |
| TRPC7_Mmus | IAMINNSYQE | IEEDADVEWK  | FARAKLWLSY | FDEGIRYELL | EE   |
| TRPC7_Drer | MLIAMINNSY | QEIEEDADVE  | WKFARAKLWL | SYFDEGIRYE | LLEE |
| TRPN_Dmel  | LLIAMMSDTY | QRIQAQSDIE  | WKFGLSKLIR | NMHRITSSDA | ESGS |
| TRPN_Cele  | LLIAMMSDTY | QRIQAQSDKE  | WKFGRAILIR | QMNKSRDVD  | LAMA |
| TRPN_Drer  | LLIAMMSDTY | QRIQAQSDTE  | WKFGRAVLIR | DMSRKSTDE- | ---- |
| TRPM1_Hsap | LLIAVFNNTF | FEVKISISNQV | WKFQRYQLIM | TFHDRPLSNR | MVNA |
| TRPM1_Mmus | LLIAVFNNTF | FEVKISISNQV | WKFQRYQLIM | TFHDRPLSGR | MVSA |
| TRPM2_Hsap | LLIAMFNNTF | QVQVEHTDQI  | WKFQRHDLIE | EYHGRPTLHW | IVRT |
| TRPM2_Mmus | LLIAMFNNTF | QVQVEHTDQI  | WKFQRHDLIE | EYHGRPVLHW | IVTT |
| TRPM3_Hsap | LLIAVFNNTF | FEVKISISNQV | WKFQRYQLIM | TFHERPLIGR | MATA |
| TRPM3_Mmus | LLIAVFNNTF | FEVKISISNQV | WKFQRYQLIM | TFHERPLIGR | MATA |
| TRPM3_Drer | LLIAVFNNTF | FEVKISISNQV | WKFQRYQLIM | TFHERPMIGR | IAVA |
| TRPM3_Dmel | LLIAVFNNIF | NEVNSVSHQV  | WVFQRFVVM  | EYQKPMSEQ  | ILSH |
| TRPM3_Cele | MLIAIFNHIF | DATDEMSQQI  | WLFQRYKQVM | EYESTPVQNE | ILEC |
| TRPM3_Cele | VAGCTYIFEK | HIQSTREIFL  | FERYGQVMEY | ESTPMHKEQM | NL   |
| TRPM3_Cele | IAHFNNIYND | SIEKSKEIWL  | FORYQQLMEY | HDSPISEVV  | QI   |
| TRPM4_Hsap | LLIAMFSYTF | GKVOGNSDLY  | WKAQRYRLIR | EFHSRPCLGW | VAEA |
| TRPM4_Mmus | LLIAMFSYTF | SKVHGNSDLY  | WKAQRYSLIR | EFHSRPCLTW | MAEA |
| TRPM4_Drer | LLIATFSYTF | TKVQEHSDKY  | WKFQRYNLIV | EYHSRPCLQW | IMET |
| TRPM4_Drer | LLIATFSYTF | SKVQERSDXY  | WKFQRYNLIV | EYHSRPCLQW | IMET |
| TRPM4_Drer | LLIAMFSYTF | NKVQERSDXY  | WKFQRYNLIV | EYHSRPCLSW | IVEA |
| TRPM5_Hsap | LLIAMFSYTF | QVVQGNADMF  | WKFQRYNLIV | EYHERPCVSS | VADV |
| TRPM5_Mmus | LLIAMFSYTF | QVVQGNADMF  | WKFQRYHLIV | EYHGRPCLSS | MTDT |
| TRPM5_Drer | LLIAMFSYTF | QVVQENADIF  | WKFQRYNLIV | EYHSRPCLSW | IAEC |
| TRPM6_Hsap | LLIAFFNNVY | LDMESISNNL  | WKYNRYRYIM | TYHEKPLSAL | TVDT |
| TRPM6_Mmus | LLIACFNNIY | LDIKSISNKL  | WKYNRYRYIM | TYHQPLSAI  | TVDT |
| TRPM7_Hsap | LLIAFFNNVY | LQVKAISNIV  | WKYQRYHFIM | AYHEKPLSAL | TVDT |
| TRPM7_Mmus | LLIAFFNNVY | LQVKAISNIV  | WKYQRYHFIM | AYHEKPLSAL | TVDT |
| TRPM7_Drer | LLIAFFNNVY | LQVKAISNLV  | WKYQRYHFIL | AYHDKPLSAL | TVDT |
| TRPM8_Hsap | LLVAMFGYTV | GTVQENNDQV  | WKFQRYFLVQ | EYCSRL---- | ---- |
| TRPM8_Mmus | LLVAMFGYTV | GIVQENNDQV  | WKFQRYFLVQ | EYCNRL---- | ---- |
| TRPA_Hsap  | LLGLAVGDIA | EVQKHASLKR  | IAMQVELHTS | LEKKLQIKLI | IQK  |
| TRPA_Mmus  | LLGLAVGDIA | EVQKHASLKR  | IAMQVELHTN | LEKKLQIKLI | IQK  |
| TRPA_Drer  | LLGLAVGDI  | AEVQTNACLK  | RIAMQIELHT | NLEERLQKL  | IVQK |
| TRPA_Drer  | LLGLAVGDI  | AEVQRNAELK  | RIAMQIDLHT | ALEKQLQKL  | IIQK |
| TRPA_Dmel  | LLGLAVGDI  | ESVRRNAQLK  | RLAMQVVLHT | ELERKLQVRL | IVQK |
| TRPA_Cele  | VGLAVDDIKG | VQEKAELKRL  | AMQVLDLVQI | EASLQKNIQ  | EN   |
| TRPV1_Hsap | MLIALMGETV | NKIAQESKNI  | WKLQRAITIL | DTEKSFAEVY | LRQF |
| TRPV1_Mmus | MLIALMGETV | NKIAQESKNI  | WKLQRAITIL | DTEKSFTEVQ | LKHY |
| TRPV1_Drer | MLIALMNQSV | EMMSVESTSI  | WKLQRAITTL | DMEWILLSS  | V--- |
| TRPV2_Hsap | MLIALMSETV | NSVATDSWSI  | WKLQKAVISL | EMENGY---- | ---- |
| TRPV2_Mmus | MLIALMSETV | NSVATDSWSI  | WKLQKAVISL | EMENGY---- | ---- |
| TRPV3_Hsap | MLIALMGETV | ENVSKESESI  | WRLQARTIIL | EFEKML---- | ---- |
| TRPV3_Mmus | MLIALMGETV | ENVSKESESI  | WRLQARTIIL | EFEKML---- | ---- |
| TRPV4_Hsap | MLIALMGETV | QVSKESKHI   | WKLQWATTIL | DIERSFEPLD | SMGN |
| TRPV4_Clup | MLIALMGETV | QVSKESKHI   | WKLQWATTIL | DIERSFEPLD | NMGN |
| TRPV4_Mmus | MLIALMGETV | QVSKESKHI   | WKLQWATTIL | DIERSFEPLD | NLGN |
| TRPV4_Drer | MLIALMGETV | QVSKESKHI   | WKLQWATTIL | DIERSFTEPL | TGRH |
| TRPV5_Hsap | MLIAMMGDTH | WRVAQERDEL  | WRAQVVATTV | MLERKLGSEG | DGEE |

|            |             |             |            |            |      |
|------------|-------------|-------------|------------|------------|------|
| TRPV5_Mmus | LFLIAMMGDTH | WRVAQERDEL  | WRAQVVATTV | MLERKMGEG  | DGEE |
| TRPV6_Hsap | LFLIAMMGDTH | WRVAHERDEL  | WRAQIVATTV | MLERKLGES  | WEYQ |
| TRPV6_Mmus | LFLIAMMGDTH | WRVAHERDEL  | WRAQVVATTV | MLERKLGEG  | WEYQ |
| TRPV6_Drer | LFLVAMMSDTQ | WRVTQERDEL  | WRTQVVATTI | MLERKL--EC | EKEE |
| TRPML1_Hsa | LFLIALITGAY | DTIKHPGGAG  | AESESLQAYI | A---Q-CPTS | GKFR |
| TRPML1_Mmu | LFLIALITGAY | DTIKHPGGTG  | TEKSELQAYI | E---Q-CPTS | GKFR |
| TRPML1_Dre | LFLIALITGAY | DTITQQTDV   | POVSELHRFI | A---E-CPTS | GNFR |
| TRPML2_Hsa | LFLIALITDSY | DTIKKFQONG  | FPETDLQEFL | K---E-CSSK | EEYQ |
| TRPML2_Mmu | LFLIALITDSY | HTIKKYQQHG  | FPETDLQKFL | K---E-SGSK | DGYQ |
| TRPML2_Dre | LFLIALITDAY | ETIKGYQTTG  | FPMTLHWFL  | KGQKE-CQQ  | EEME |
| TRPML3_Hsa | LFLIALITDTY | ETIKQYQODG  | FPETELRTFI | S---E-CPNS | GKYR |
| TRPML3_Mmu | LFLIALITDTY | ETIKHYQODG  | FPETELRKF  | A---E-CPNS | GKYR |
| TRPML3_Dre | LFLILITDTY  | DTIKHQQLDG  | EPVSDLQAFV | L---Q-CPDS | GEFS |
| TRPML3_Dme | LFLIAVIMDAY | DTIKAYYKDG  | FPTTDLKAFV | GTR---TISS | GVFM |
| TRPML3_Dme | LFLIAVIMDAY | DTIKAYYKDG  | FPTTDLKAFV | GTR---TISS | GVFM |
| TRPML3_Ce1 | LFLIAVIMDAY | EVVKDRYSDG  | LRAIEKRGCL | RDFVE-PSAY | APSN |
| TRPP_PKD1_ | LGAVILRWRY  | HALRGELRPA  | WEPQDYEMVE | LFLRRLVEQQ | LHSL |
| TRPP_PKD1_ | LGAILLRWRY  | HALRGELRPA  | WEPQDYEMVE | LFLRRLVEQQ | LQSL |
| TRPP_PKD1_ | LMSALLR-NY  | RRARAELRPA  | VDLQDYEMVE | LFLRRLLEYR | IERL |
| TRPP_PKD2_ | MFLAIINDTY  | SEVKSDDLQOK | AEMELSDLIR | KGYHKAIIDA | VIVK |
| TRPP_PKD2_ | MFLAIINDSY  | SEVKSDDLQOK | AEMELSDLIR | KGCQKAIIDA | VIVK |
| TRPP_PKD2_ | MFLAIINDTY  | SEVKADMQR   | SEMEITDLIK | KSYNRAIIDA | VIVK |
| TRPP_PKD2_ | MFLAIINDSY  | SEVKAE LRKK | DGEGILDWFM | NKVRGLIIEG | VNAT |
| TRPP_PKD2L | MFLAIINDTY  | SEVKEELGQK  | DELQLSDLLK | QGYNKTVIDA | VGSK |
| TRPP_PKD2L | MFLAIINDTY  | SEVKEELGQK  | DELQLSDLLK | QGYNKTVIDA | VGSK |
| TRPP_PKD2L | MFLAIINDTY  | SEVKEELGQK  | DQLQLSDFLK | QSYNKTVIDA | VGSK |
| TRPP_PKD2L | MFLAIINDTY  | SEVKSELSQK  | DEFQIADLIK | QSYAKTILDF | VMEK |
| TRPP_PKD2L | MFLAIINDTY  | SEVKADYGRR  | LDFELGKMIK | QSYKNV--EC | LTKR |
| TRPP_PKD2L | MFLAIINDTY  | SEVKADYGRR  | PDFELGKIIQ | KSCFNVVLNQ | LMRK |
| TRPP_PKD2L | MFLAIIMETY  | NTVKGEL-TQ  | GRSHLGSYIY | RKLSGMLMDD | ILKR |
| Cca7050    | WKASFGATVI  | DVQKSQ----  | ----       |            |      |
| Cca21784   | WKETRAELLM  | QVKHTH----  | ----       |            |      |
| Cca260897  | AEIRDDDEMT  | VTDYFKKSYN  | KL-----    |            |      |
| Sla36613_6 | NDYEVFDYIL  | GKFKNI----  | ----       |            |      |
| Sycon24227 | AQRELEQNWA  | ASLRNLEQGT  | TRQSLDEQ   |            |      |
| Sycon24228 | RELEQNWAAS  | LRNLEQGTTR  | QSLDEQ     |            |      |
| Sycon9763  | VWX-----    | -----       | -----      |            |      |
| Ava16635_4 | WKYKFFNSVK  | EFRDKPSRRI  | LIRY       |            |      |
| Ava9904_1  | WKFTRYSAIE  | EFRLKPVCHT  | LLDH       |            |      |
| Ava7536_5  | ATMEKARILL  | SFERKLMGE   | LEKR       |            |      |
| Ava6620_1  | YITQFLEVVD  | EYQRKSVGVK  | SVNL       |            |      |
| Cca31351   | WKEERLKTVS  | SDFLS-DCRF  | CLDM       |            |      |
| Cca30979_3 | NKYEVVEYIK  | EIVGL-----  | ----       |            |      |
| Ava26193_2 | LYKNRAWILA  | RIEHNSILQA  | RDQK       |            |      |
| Ava26160_2 | ATMEKARILL  | SFERKL----  | ----       |            |      |

Fig S4  
 phylobayes  
 analysis of  
 the data in  
 Fig 5a

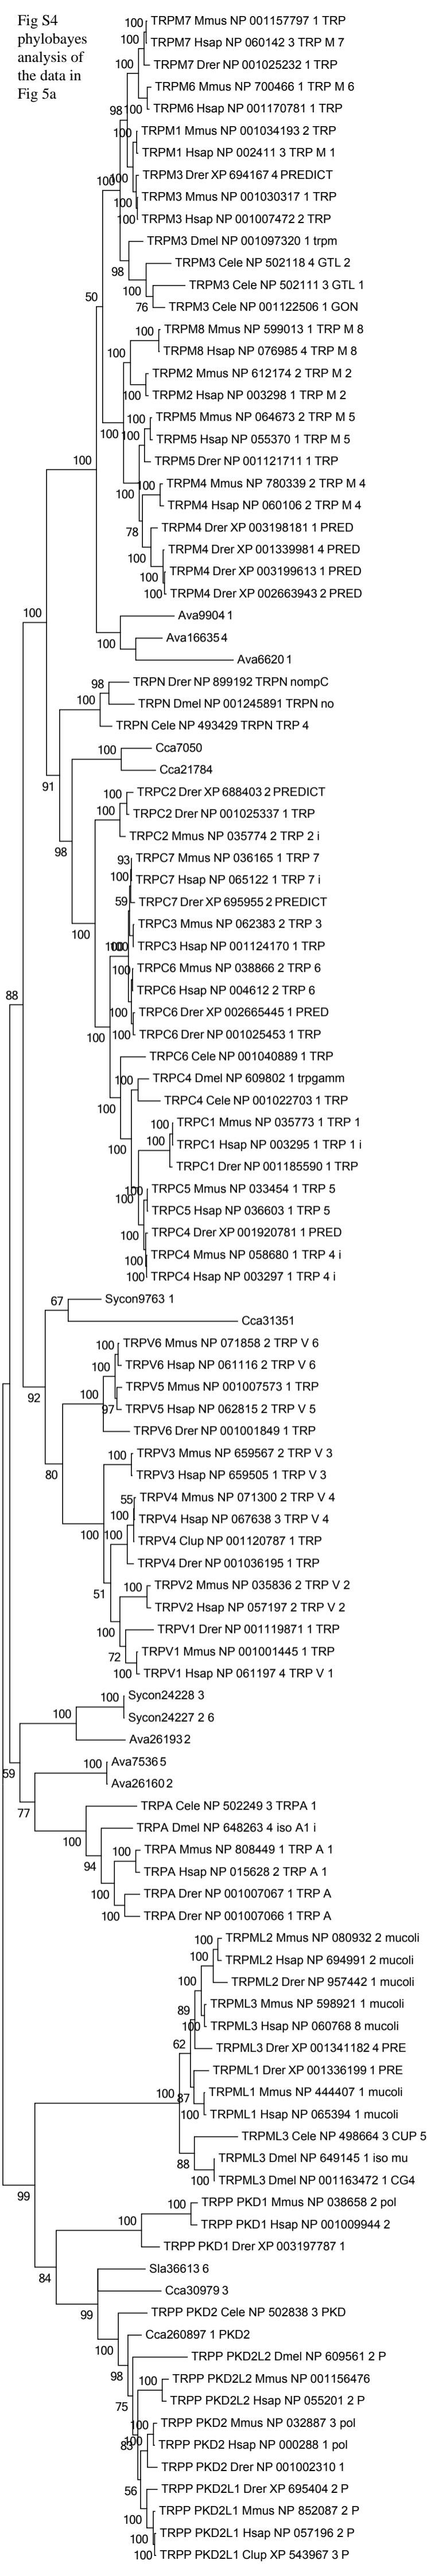

# Supplementary figure S5: Full alignment for sequences shown in figure 5c

```

TRPC1_Hsap_NP_003295.1 -----
TRPC1_Mmus_NP_035773.1 -----
TRPC4_Hsap_NP_003297.1 -----
TRPC4_Mmus_NP_058680.1 -----
TRP_Spur_XP_793901 -----
TRP_Cint_XP_002124651.2 -----
TRP_Skow_XP_002733765.1 -----
TRP_Lflor_emb|CAA11261.1 -----
TRP_Bflo_XP_002611405.1 -----
TRP4_Sman_XP_002576849.1 -----
TRP_Nvec4_XP_001640409 -----
TRP_Nvec1_XP_001637374.1 -----
Cca7050 -----
Cca21784 -----
Ava16635_4 VNPLHINRDR HGSLASNNIS LLKYTLMSEN SEQLSAGSAY FTASPRDNYT TYDMSKQASL
Ava9904_1 -----NKT KYSFT-----
Ava6620_1 -----

TRPC1_Hsap_NP_003295.1 -----
TRPC1_Mmus_NP_035773.1 -----
TRPC4_Hsap_NP_003297.1 -----
TRPC4_Mmus_NP_058680.1 -----
TRP_Spur_XP_793901 -----
TRP_Cint_XP_002124651.2 -----
TRP_Skow_XP_002733765.1 -----
TRP_Lflor_emb|CAA11261.1 -----
TRP_Bflo_XP_002611405.1 -----MRRHNYDKEH IMIVTMIGGE
TRP4_Sman_XP_002576849.1 -----
TRP_Nvec4_XP_001640409 -----
TRP_Nvec1_XP_001637374.1 -----
Cca7050 -----
Cca21784 -----
Ava16635_4 DLQVMDNPTP SPTGSQTDRL ISSSLTPQTS ERNVTKSLNN LEASRLRPRL PFVKQAMGNK
Ava9904_1 -----RL DFISRA-----
Ava6620_1 -----

TRPC1_Hsap_NP_003295.1 -----MMAAL YPSTDLSGAS SSSLPSS-----
TRPC1_Mmus_NP_035773.1 -----M GAPPPSPGLP PSWAAMMAAL YPSTDLSGVS SSSLPSS-----
TRPC4_Hsap_NP_003297.1 -----
TRPC4_Mmus_NP_058680.1 -----
TRP_Spur_XP_793901 -----
TRP_Cint_XP_002124651.2 -----
TRP_Skow_XP_002733765.1 -----MMELSSSTL
TRP_Lflor_emb|CAA11261.1 -----
TRP_Bflo_XP_002611405.1 CVSCTSLQSN GHGNKPTHGV PPIATNMAAT IPDEVLQEED ADRIPLRVVH HESDLSEAEK
TRP4_Sman_XP_002576849.1 -----
TRP_Nvec4_XP_001640409 -----
TRP_Nvec1_XP_001637374.1 -----
Cca7050 -----
Cca21784 -----
Ava16635_4 TDFNSPNSG AVPFSGSLPR KRVMLQRIES HANSTLDEEF ARELKNSMDT MLQEEPGSP
Ava9904_1 -----
Ava6620_1 -----

TRPC1_Hsap_NP_003295.1 -----PSSS SPNEVMALKD -----VREVK
TRPC1_Mmus_NP_035773.1 -----PSSS SPNEVMALKD -----VREVK
TRPC4_Hsap_NP_003297.1 -----MAQF YYKRNVNAPY RDRIPLRIVR
TRPC4_Mmus_NP_058680.1 -----MAQF YYKRNVNAPY RDRIPLRIVR
TRP_Spur_XP_793901 -----
TRP_Cint_XP_002124651.2 -----
TRP_Skow_XP_002733765.1 ELVTPPTRGD SPMMFPRNAN Y---QNRGV ASGLLNAAFT QRRSASVISG VSSIPLQLFS
TRP_Lflor_emb|CAA11261.1 -----
TRP_Bflo_XP_002611405.1 RFLVSVVERGD YATVRKILED YGPGEQSGRL FVCLFNMAAT IPDEVLQEED ADRIPLRVVH
TRP4_Sman_XP_002576849.1 -----
TRP_Nvec4_XP_001640409 -----
TRP_Nvec1_XP_001637374.1 -----
Cca7050 -----
Cca21784 -----
Ava16635_4 NNQEALNRAD TEVIKQRTIL MSRHENKENI TSVNENETQS LSSK-TKSSI FSKMKIDHAS
Ava9904_1 -----TM TSCSLQEKDW PQIKPSRSRV FSRLSITSGN
Ava6620_1 -----

TRPC1_Hsap_NP_003295.1 E-----
TRPC1_Mmus_NP_035773.1 E-----
TRPC4_Hsap_NP_003297.1 A-----
TRPC4_Mmus_NP_058680.1 A-----
TRP_Spur_XP_793901 -----

```

|                          |            |             |            |            |            |             |
|--------------------------|------------|-------------|------------|------------|------------|-------------|
| TRP_Cint_XP_002124651.2  | -----      | -----       | -----      | -----      | -----      | -----       |
| TRP_Skow_XP_002733765.1  | E-----     | -----       | -----      | -----      | -----      | -----       |
| TRP_Lflor_emb CAA11261.1 | -----      | -----       | -----      | -----      | -----      | -----       |
| TRP_Bflo_XP_002611405.1  | H-----     | -----       | -----      | -----      | -----      | -----       |
| TRP4_Sman_XP_002576849.1 | -----      | -----       | -----      | -----      | -----      | -----       |
| TRP_Nvec4_XP_001640409   | -----      | -----       | -----      | -----      | -----      | -----       |
| TRP_Nvec1_XP_001637374.1 | -----      | -----       | -----      | -----      | -----      | -----       |
| Cca7050                  | -----      | ---MSTDCLD  | VDMLVMLCQS | DVDLLLSDEN | NITAMHHMVE | KHRPTDAHLV  |
| Cca21784                 | -----      | -----       | -----      | -----      | -----      | -----       |
| Ava16635_4               | PGDHVEMNKL | FTVPD-SISN  | TEITPLLDQH | TGNVENEIEK | TVDGHIHFPT | RHGRKDANYL  |
| Ava9904_1                | EKAEFLEEQL | QNVLSVITYQG | SDISEIPCWH | SKALKKSDEI | EIDTDFEYSC | GNVVKFEGAYE |
| Ava6620_1                | -----      | -----       | -----      | -----      | -----      | -----       |

|                          |            |            |            |            |            |            |
|--------------------------|------------|------------|------------|------------|------------|------------|
| TRPC1_Hsap_NP_003295.1   | -----      | -----      | -----      | -----      | -----      | -----      |
| TRPC1_Mmus_NP_035773.1   | -----      | -----      | -----      | -----      | -----      | -----      |
| TRPC4_Hsap_NP_003297.1   | -----      | -----      | -----      | -----      | -----      | -----      |
| TRPC4_Mmus_NP_058680.1   | -----      | -----      | -----      | -----      | -----      | -----      |
| TRP_Spur_XP_793901       | -----      | -----      | -----      | -----      | -----      | -----      |
| TRP_Cint_XP_002124651.2  | -----      | -----      | -----      | -----      | -----      | -----      |
| TRP_Skow_XP_002733765.1  | -----      | -----      | -----      | -----      | -----      | -----      |
| TRP_Lflor_emb CAA11261.1 | -----      | -----      | -----      | -----      | -----      | -----      |
| TRP_Bflo_XP_002611405.1  | -----      | -----      | -----      | -----      | -----      | -----      |
| TRP4_Sman_XP_002576849.1 | -----      | -----      | -----      | -----      | -----      | -----      |
| TRP_Nvec4_XP_001640409   | -----      | -----      | -----      | -----      | -----      | -----      |
| TRP_Nvec1_XP_001637374.1 | -----      | -----      | -----      | -----      | -----      | -----      |
| Cca7050                  | HTLASERP-- | -----      | -----      | -----      | -----      | -----      |
| Cca21784                 | -----      | -----      | -----      | -----      | -----      | -----      |
| Ava16635_4               | IIPPQASPS- | -----D     | LLDVLSKTKW | -----      | ----LPSPKI | IISLPGTSQ- |
| Ava9904_1                | VADPAKKPKI | VSITPKCEVN | QLPKIHKYFK | YDATHREYFV | HHFRLCKPNL | TLILPSTTDH |
| Ava6620_1                | -----      | -----      | -----      | -----      | -----      | -----      |

|                          |            |            |            |            |            |            |
|--------------------------|------------|------------|------------|------------|------------|------------|
| TRPC1_Hsap_NP_003295.1   | -----      | -----      | -----      | -----      | -----      | -----      |
| TRPC1_Mmus_NP_035773.1   | -----      | -----      | -----      | -----      | -----      | -----      |
| TRPC4_Hsap_NP_003297.1   | -----      | -----      | -----      | -----      | -----      | -----      |
| TRPC4_Mmus_NP_058680.1   | -----      | -----      | -----      | -----      | -----      | -----      |
| TRP_Spur_XP_793901       | -----      | -----      | -----      | -----      | -----      | -----      |
| TRP_Cint_XP_002124651.2  | -----      | -----      | -----      | -----      | -----      | -----      |
| TRP_Skow_XP_002733765.1  | -----      | -----      | -----      | -----      | -----      | -----      |
| TRP_Lflor_emb CAA11261.1 | -----      | -----      | -----      | -----      | -----      | -----      |
| TRP_Bflo_XP_002611405.1  | -----      | -----      | -----      | -----      | -----      | -----      |
| TRP4_Sman_XP_002576849.1 | -----      | -----      | -----      | -----      | -----      | -----      |
| TRP_Nvec4_XP_001640409   | -----      | -----      | -----      | -----      | -----      | -----      |
| TRP_Nvec1_XP_001637374.1 | -----      | -----      | -----      | -----      | -----      | -----      |
| Cca7050                  | -----      | -----      | -----      | -----      | -----      | -----      |
| Cca21784                 | -----      | -----      | -----      | -----      | -----      | -----      |
| Ava16635_4               | -----LSQG  | SRFRQMLKEN | LIRIAATTKA | WFLTEGVNKG | ISAFVGSCLQ | SHAYKRFAKK |
| Ava9904_1                | CPENAIRNRD | PNYMKNFLSD | MRQIIRNTDT | WVLNGLNNG  | LTRIIGENIA | TRVLSPFAT  |
| Ava6620_1                | -----      | -----      | -----      | -----      | -----      | -----      |

|                          |            |            |            |            |            |                 |
|--------------------------|------------|------------|------------|------------|------------|-----------------|
| TRPC1_Hsap_NP_003295.1   | -----      | -----      | -----      | -----      | -----      | -----ENT        |
| TRPC1_Mmus_NP_035773.1   | -----      | -----      | -----      | -----      | -----      | -----ENT        |
| TRPC4_Hsap_NP_003297.1   | -----      | -----      | -----      | -----      | -----      | -----ESE        |
| TRPC4_Mmus_NP_058680.1   | -----      | -----      | -----      | -----      | -----      | -----ESE        |
| TRP_Spur_XP_793901       | -----      | -----      | -----      | -----      | -----      | -----MPG        |
| TRP_Cint_XP_002124651.2  | -----      | -----      | -----      | -----      | -----      | -----           |
| TRP_Skow_XP_002733765.1  | -----      | -----      | -----      | -----      | -----      | -----GNR        |
| TRP_Lflor_emb CAA11261.1 | -----      | -----      | -----      | -----      | -----      | -----MSKKPPRKRD |
| TRP_Bflo_XP_002611405.1  | -----      | -----      | -----      | -----      | -----      | -----ESD        |
| TRP4_Sman_XP_002576849.1 | -----      | -----      | -----      | -----      | -----      | -----           |
| TRP_Nvec4_XP_001640409   | -----      | -----      | -----      | -----      | -----      | -----           |
| TRP_Nvec1_XP_001637374.1 | -----      | -----      | -----      | -----      | -----      | -----           |
| Cca7050                  | -----      | -----      | -----      | -----      | -----      | -----YDF        |
| Cca21784                 | -----      | -----      | -----      | -----      | -----      | -----           |
| Ava16635_4               | EQNQRDWFIG | TGFGDYDAPI | PIIGMVNPEN | IYKGTLFQNP | TDSITYGKDN | SSLCFPDRNL      |
| Ava9904_1                | T-----     | -----I     | ELIGIQKFEK | L--PATVRNC | ISRLSMKAQL | EEDTIP-RGC      |
| Ava6620_1                | -----      | -----      | ---FVKKDS  | HTVMARNEEL | IPLREREIEQ | EVLPIRHSND      |

|                          |            |            |            |       |       |       |
|--------------------------|------------|------------|------------|-------|-------|-------|
| TRPC1_Hsap_NP_003295.1   | LN--EKL    | LL         | ACDKGDYYMV | KK    | ----- | ----- |
| TRPC1_Mmus_NP_035773.1   | LN--EKL    | LL         | ACDKGDYYMV | KK    | ----- | ----- |
| TRPC4_Hsap_NP_003297.1   | LSPSEKAYLN | AVEKGDYASV | KK         | ----- | ----- | ----- |
| TRPC4_Mmus_NP_058680.1   | LSPSEKAYLN | AVEKGDYASV | KK         | ----- | ----- | ----- |
| TRP_Spur_XP_793901       | SNHKEFG    | IL         | ARSPMTETER | PR    | ----- | ----- |
| TRP_Cint_XP_002124651.2  | -----      | -----      | -----      | ----- | ----- | ----- |
| TRP_Skow_XP_002733765.1  | LTAKE      | RM         | FAEKGDNATI | QK    | ----- | ----- |
| TRP_Lflor_emb CAA11261.1 | LNNEERQ    | ELG        | AVARGDVGSV | KQ    | ----- | ----- |
| TRP_Bflo_XP_002611405.1  | LSEAEKR    | ELV        | SVERGDYATV | RK    | ----- | ----- |
| TRP4_Sman_XP_002576849.1 | -----      | -----      | -----      | ----- | ----- | ----- |

|                          |             |             |            |            |            |            |
|--------------------------|-------------|-------------|------------|------------|------------|------------|
| TRP_Nvec4_XP_001640409   | -----       | -----       | -----      | -----      | -----      | -----      |
| TRP_Nvec1_XP_001637374.1 | -----       | -----       | -----      | -----      | -----      | -----      |
| Cca7050                  | NTTRDSIHLH  | ACVHGSKATL  | QE         | -----      | -----      | -----      |
| Cca21784                 | -----       | -----       | -----      | -----      | -----      | -----      |
| Ava16635_4               | LDANHSRIV   | LSKSISGNSI  | DQ-WSC     | -----      | -----      | IE         |
| Ava9904_1                | LEENHSLFLS  | LKDNLDREDEI | ETFWDT     | -----      | -----      | IE         |
| Ava6620_1                | LFMKHWEYVE  | EARLDNREQQ  | PNFWKIPFAF | GHSLVDDSKD | DRLVTHYKHV | PQKSIHQETK |
| TRPC1_Hsap_NP_003295.1   | -----       | -----       | -----      | -----      | -----      | -----      |
| TRPC1_Mmus_NP_035773.1   | -----       | -----       | -----      | -----      | -----      | -----      |
| TRPC4_Hsap_NP_003297.1   | -----       | -----       | -----      | -----      | -----      | -----      |
| TRPC4_Mmus_NP_058680.1   | -----       | -----       | -----      | -----      | -----      | -----      |
| TRP_Spur_XP_793901       | -----       | -----       | -----      | -----      | -----      | -----      |
| TRP_Cint_XP_002124651.2  | -----       | -----       | -----      | -----      | -----      | -----      |
| TRP_Skow_XP_002733765.1  | -----       | -----       | -----      | -----      | -----      | -----      |
| TRP_Lflor_emb CAA11261.1 | -----       | -----       | -----      | -----      | -----      | -----      |
| TRP_Bflo_XP_002611405.1  | -----       | -----       | -----      | -----      | -----      | -----      |
| TRP4_Sman_XP_002576849.1 | -----       | -----       | -----      | -----      | -----      | -----      |
| TRP_Nvec4_XP_001640409   | -----       | -----       | -----      | -----      | -----      | -----      |
| TRP_Nvec1_XP_001637374.1 | -----       | -----       | -----      | -----      | -----      | -----      |
| Cca7050                  | -----       | -----       | -----      | -----      | -----      | -----      |
| Cca21784                 | -----       | -----       | -----      | -----      | -----      | -----      |
| Ava16635_4               | ET          | -----       | -----      | -----      | -----      | -----      |
| Ava9904_1                | HTQIIKRIED  | IKAATCRESI  | ILLLEQKWKD | NREAPNTPKT | KTSLVELSTK | RNSEVGEFKP |
| Ava6620_1                | DEGDLVKKPS  | TKFYDIVEIP  | ILLDPSNIDF | LKYAKSLKQI | LEVVKDLAYD | RFNYSKIDF  |
| TRPC1_Hsap_NP_003295.1   | -----       | -----       | -----      | -----      | -----      | -----      |
| TRPC1_Mmus_NP_035773.1   | -----       | -----       | -----      | -----      | -----      | -----      |
| TRPC4_Hsap_NP_003297.1   | -----       | -----       | -----      | -----      | -----      | -----      |
| TRPC4_Mmus_NP_058680.1   | -----       | -----       | -----      | -----      | -----      | -----      |
| TRP_Spur_XP_793901       | -----       | -----       | -----      | -----      | -----      | -----      |
| TRP_Cint_XP_002124651.2  | -----       | -----       | -----      | -----      | -----      | -----      |
| TRP_Skow_XP_002733765.1  | -----       | -----       | -----      | -----      | -----      | -----      |
| TRP_Lflor_emb CAA11261.1 | -----       | -----       | -----      | -----      | -----      | -----      |
| TRP_Bflo_XP_002611405.1  | -----       | -----       | -----      | -----      | -----      | -----      |
| TRP4_Sman_XP_002576849.1 | -----       | -----       | -----      | -----      | -----      | -----      |
| TRP_Nvec4_XP_001640409   | -----       | -----       | -----      | -----      | -----      | -----      |
| TRP_Nvec1_XP_001637374.1 | -----       | -----       | -----      | -----      | -----      | -----      |
| Cca7050                  | -----       | -----       | -----      | -----      | -----      | -----      |
| Cca21784                 | -----       | -----       | -----      | -----      | -----      | -----      |
| Ava16635_4               | -----       | -VSNHLKIGK  | EPL        | -----      | -----      | PIVRI      |
| Ava9904_1                | DGDLIEMGKL  | EKANFVIFED  | EPTRVGRITD | SGPRIPSEFQ | NLWFKQIEFK | DPDINPAVCL |
| Ava6620_1                | FNMIYIPEI   | TKTGAGLLAV  | PNTAVAILGK | VITDLLTKNK | ALIILDARAK | GPITNLVLES |
| TRPC1_Hsap_NP_003295.1   | -----       | -----       | ---ILEENS  | SG-DLNINCV | DVLG       | -----RN    |
| TRPC1_Mmus_NP_035773.1   | -----       | -----       | ---ILEENS  | SG-DLNINCV | DVLG       | -----RN    |
| TRPC4_Hsap_NP_003297.1   | -----       | -----       | ---SLEEAE  | IYFKININCI | DPLG       | -----RT    |
| TRPC4_Mmus_NP_058680.1   | -----       | -----       | ---SLEEAE  | IYFKININCI | DPLG       | -----RT    |
| TRP_Spur_XP_793901       | -----       | -----       | -----      | -----      | -----      | -----      |
| TRP_Cint_XP_002124651.2  | -----       | -----       | ---NLLRAF  | TNRNIGLGVI | GFNG       | -----NV    |
| TRP_Skow_XP_002733765.1  | -----       | -----       | ---CLKHPD  | P--VNVNVT  | NILG       | -----RS    |
| TRP_Lflor_emb CAA11261.1 | -----       | -----       | ---ALAAEAE | ERF-IDISCK | DSLQ       | -----RS    |
| TRP_Bflo_XP_002611405.1  | -----       | -----       | ---ILEDYG  | P--EMDINCT | DPLS       | -----RT    |
| TRP4_Sman_XP_002576849.1 | -----       | -----       | -----      | ---MG      | -----      | -----      |
| TRP_Nvec4_XP_001640409   | -----       | -----       | -----      | -----      | -----      | -----      |
| TRP_Nvec1_XP_001637374.1 | -----       | -----       | -----      | -----      | -----      | -----      |
| Cca7050                  | -----       | -----       | -----      | -----      | -----      | -----      |
| Cca21784                 | -----       | -----       | -----      | -----      | -----      | -----      |
| Ava16635_4               | VIDNTLHVIE  | QVGQSMKNKV  | ATV-VISSNE | LMRKIHSYIF | TLTV       | -----RD    |
| Ava9904_1                | LLDNSIDGLR  | HTLHAIRNRV  | PTILVIGSGI | AADMTHQIM  | -LIS       | -----RD    |
| Ava6620_1                | LBRAKHDGVK  | QITERIQNRL  | NFL-GFYDKP | LKQDIDPEAP | NALGNKRYLL | STDGCRELKS |
| TRPC1_Hsap_NP_003295.1   | AVTITTIENEN | LDILO       | -----      | -----      | LLD-Y      | -----      |
| TRPC1_Mmus_NP_035773.1   | AVTITTIENES | LDILO       | -----      | -----      | LLD-Y      | -----      |
| TRPC4_Hsap_NP_003297.1   | ALLIAIENEN  | LELIE       | -----      | -----      | LLS-F      | -----      |
| TRPC4_Mmus_NP_058680.1   | ALLIAIENEN  | LELIE       | -----      | -----      | LLS-F      | -----      |
| TRP_Spur_XP_793901       | -----       | TRGG        | IDIIIV     | -----      | LLS-H      | -----      |
| TRP_Cint_XP_002124651.2  | AAGIAVELKD  | DLLIK       | -----      | -----      | IVVEH      | -----      |
| TRP_Skow_XP_002733765.1  | ALQISVDNEN  | IEIVE       | -----      | -----      | LLAQP      | -----      |
| TRP_Lflor_emb CAA11261.1 | SIVIAIENEN  | DDLVS       | -----      | -----      | LLN-Y      | -----      |
| TRP_Bflo_XP_002611405.1  | ALLIAIENEN  | LELVG       | -----      | -----      | LLS-Y      | -----      |
| TRP4_Sman_XP_002576849.1 | -----       | -----       | -----      | -----      | LLGRE      | -----      |
| TRP_Nvec4_XP_001640409   | -----       | EMIR        | -----      | -----      | LLK-N      | -----      |
| TRP_Nvec1_XP_001637374.1 | -----       | -----       | -----      | -----      | LLQ        | -----      |
| Cca7050                  | -----       | -----       | -----      | -----      | -----      | -----      |
| Cca21784                 | -----       | -----       | -----      | -----      | -----      | -----      |
| Ava16635_4               | QKMASTK     | QDFLKC      | CCGF       | LKNEAQSEEI | LTNIGFILDK | PNLFTMF    |



|                          |            |             |            |             |             |             |
|--------------------------|------------|-------------|------------|-------------|-------------|-------------|
| Ava9904_1                | HEVTSISNEV | REYLKQNYPL  | QALRLPEDLL | RRVISSVVDN  | EEFTFY---   | -----       |
| Ava6620_1                | MASSISKVL  | KGCIVRHDH   | NDGKLVKEHL | LYETSCLLKI  | PGTKIEFIVE  | PGKRTCHEVQ  |
| TRPC1_Hsap_NP_003295.1   | -----      | -----       | -----      | -----       | -----       | -----       |
| TRPC1_Mmus_NP_035773.1   | -----      | -----       | -----      | -----       | -----       | -----       |
| TRPC4_Hsap_NP_003297.1   | -----      | -----       | -----      | -----       | -----       | -----       |
| TRPC4_Mmus_NP_058680.1   | -----      | -----       | -----      | -----       | -----       | -----       |
| TRP_Spur_XP_793901       | -----      | -----       | -----      | -----       | -----       | -----       |
| TRP_Cint_XP_002124651.2  | -----      | -----       | -----      | -----       | -----       | -----       |
| TRP_Skow_XP_002733765.1  | -----      | -----       | -----      | -----       | -----       | -----       |
| TRP_Lflor_emb CAA11261.1 | -----      | -----       | -----      | -----       | -----       | -----       |
| TRP_Bflo_XP_002611405.1  | -----      | -----       | -----      | -----       | -----       | -----       |
| TRP4_Sman_XP_002576849.1 | -----      | -----       | -----      | -----       | -----       | -----       |
| TRP_Nvec4_XP_001640409   | -----      | -----       | -----      | -----       | -----       | -----       |
| TRP_Nvec1_XP_001637374.1 | -----      | -----       | -----      | -----       | -----       | -----       |
| Cca7050                  | -----      | -----       | -----      | -----       | -----       | -----       |
| Cca21784                 | -----      | -----       | -----      | -----       | -----       | -----       |
| Ava16635_4               | -----      | -----       | -----      | -----       | -----       | -----       |
| Ava9904_1                | -----      | -----       | -----      | -----       | -----       | -----       |
| Ava6620_1                | IDFLDPHYKE | TDDRVYNFYR  | KEPELYQMIL | QKADEYFYRD  | ESDFKGNWNTM | TTALFLRDQY  |
| TRPC1_Hsap_NP_003295.1   | -----      | -----GC     | Q-----     | -----       | -----       | -----       |
| TRPC1_Mmus_NP_035773.1   | -----      | -----GC     | QSADALLVAT | DS-----     | -----       | -----       |
| TRPC4_Hsap_NP_003297.1   | -----      | -----NV     | YVGDALLHAI | RK-----     | -----       | -----       |
| TRPC4_Mmus_NP_058680.1   | -----      | -----NV     | YVGDALLHAI | RK-----     | -----       | -----       |
| TRP_Spur_XP_793901       | -----      | -----GI     | QLGDALLRAV | DE-----     | -----       | -----       |
| TRP_Cint_XP_002124651.2  | -----      | ---LIKQPSMA | RMGDALLLAI | SK-----     | -----       | -----       |
| TRP_Skow_XP_002733765.1  | -----      | -----NV     | KIGDALLYAI | RE-----     | -----       | -----       |
| TRP_Lflor_emb CAA11261.1 | -----      | -----DV     | DLEDSSLHAI | RE-----     | -----       | -----       |
| TRP_Bflo_XP_002611405.1  | -----      | -----NV     | RVGDALLHAI | KR-----     | -----       | -----       |
| TRP4_Sman_XP_002576849.1 | -----      | -----GA     | DVGAALLOAV | SK-----     | -----       | -----       |
| TRP_Nvec4_XP_001640409   | -----      | -----       | -----      | -----       | -----       | -----       |
| TRP_Nvec1_XP_001637374.1 | -----      | -----       | -----      | -----       | -----       | -----       |
| Cca7050                  | -----      | --LGASIDGK  | DGASGIPVML | LAASSAVNQT  | AIENVNILMA  | NGADLHVTSS  |
| Cca21784                 | -----      | -----       | -----      | -----       | -----       | -----       |
| Ava16635_4               | -----      | --DMNMTYGA  | DLSKAIVVAL | LKSRKSTGKE  | KLKEALDLVI  | DWNRVDLAEQ  |
| Ava9904_1                | -----      | --HPLRHGIH  | ELNKAILLAL | LKG--YPGDN  | KRLYGLILSF  | RWKRPSLAE   |
| Ava6620_1                | RVRRALERRT | REESVKFDQN  | QIGRIIRYAL | FYGSREIVEN  | IF-----     | -----       |
| TRPC1_Hsap_NP_003295.1   | -----      | -----       | -----      | -----       | -----       | -----KLME   |
| TRPC1_Mmus_NP_035773.1   | -----      | -----       | -----EV    | VGAVDILLNH  | ----RPKRS   | SRPTIVKLME  |
| TRPC4_Hsap_NP_003297.1   | -----      | -----       | -----EV    | VGAVELLLNH  | ----KKPS    | GEKQVPPI--  |
| TRPC4_Mmus_NP_058680.1   | -----      | -----       | -----EV    | VGAVELLLNH  | ----KKPS    | GEKQVPPI--  |
| TRP_Spur_XP_793901       | -----      | -----       | -----QF    | IYAAQIICEH  | IKQKNIPEFL  | -----       |
| TRP_Cint_XP_002124651.2  | -----      | -----       | -----GY    | LRIAEILMNH  | PSFCVNQRLT  | TSPGELMLID  |
| TRP_Skow_XP_002733765.1  | -----      | -----       | -----GV    | YKMVEMMVNH  | PS--ISREML  | GGEWS-KMTK  |
| TRP_Lflor_emb CAA11261.1 | -----      | -----       | -----EY    | VVAVEMILTH  | ----QLKFK   | GEDYL--     |
| TRP_Bflo_XP_002611405.1  | -----      | -----       | -----EF    | VGAVELLLN-  | ----QLKFK   | TEDKTQYM--  |
| TRP4_Sman_XP_002576849.1 | -----      | -----       | -----      | -----       | -----       | -----       |
| TRP_Nvec4_XP_001640409   | -----      | -----       | -----DN    | VLYVKALLAY  | EN--NN-DRF  | SRRSSSCV--  |
| TRP_Nvec1_XP_001637374.1 | -----      | -----       | -----      | -----       | -----       | -----       |
| Cca7050                  | N-----     | -----GQN    | LCHIAAILCN | VQLELALIA-  | -----       | -----       |
| Cca21784                 | -----      | -----       | -----      | ---MQTAID-  | -----       | -----       |
| Ava16635_4               | NIFTESMVW- | --GDTDLFQH  | -YFAILILNQ | VDFLEMLER-  | -----       | -----       |
| Ava9904_1                | KIFIGREKWI | SEDDTRAVQR  | IFFSALTTNN | TGFVHRMLES  | -----       | -----       |
| Ava6620_1                | -----      | -----       | -----NN    | SDIQORLIKK  | -----       | -----       |
| TRPC1_Hsap_NP_003295.1   | -----RIQN  | PEYSTMDVA   | PVILAAGH-- | RNNYEILTML  | LKQDVSLPKP  | HAVGCECTLG  |
| TRPC1_Mmus_NP_035773.1   | -----RIQN  | PEYSTMDVA   | PVILAAGH-- | RNNYEILTML  | LKQDVSLPKP  | HAVGCECTLG  |
| TRPC4_Hsap_NP_003297.1   | -----LLDK  | QFSEFTPDIT  | PIILAAGH-- | TNNYEIILKLL | VQKGVSVPRP  | HEVRCNCVEC  |
| TRPC4_Mmus_NP_058680.1   | -----LLDK  | QFSEFTPDIT  | PIILAAGH-- | TNNYEIILKLL | VQKGVSVPRP  | HEVRCNCVEC  |
| TRP_Spur_XP_793901       | -----KCRAL | LNGDFHPDIT  | PVILAAGH-- | HNNYDIIKLL  | LEYGARIEDP  | EYY-----    |
| TRP_Cint_XP_002124651.2  | PNSDFYAYDN | DGTRFSPDIT  | PIILAAGH-- | CQEFDIVYEL  | IRRGATIQHP  | HPYRCQCTEC  |
| TRP_Skow_XP_002733765.1  | -----DPQE  | ESSDYSFDPIS | PVILAAGH-- | CNQEELIQLL  | LTRGATISTP  | HNVTGCGEHC  |
| TRP_Lflor_emb CAA11261.1 | -----QIEF  | KSNTFTADIT  | PIILAAGH-- | IDNYEIIKML  | LDRGYRIPKP  | HDLTCHQDDC  |
| TRP_Bflo_XP_002611405.1  | -----KYVQ  | KESDFTEDMT  | PIILAAGH-- | KNNYEILKLL  | LQKGHPIPKP  | HDVRCNCNEC  |
| TRP4_Sman_XP_002576849.1 | -----      | QSSSFTPDIN  | PIILAAGH-- | RDNYVILKLL  | LDRGDRIYKP  | HDLRACNIC   |
| TRP_Nvec4_XP_001640409   | -----NLSK  | NTNDSNRYMT  | PIILAAGH-- | NNSYDIVKLL  | LSKCHTIDRV  | HDRGCLCPWC  |
| TRP_Nvec1_XP_001637374.1 | -----      | -----       | PLVVAAGQ-- | LGNYEVLNML  | VSKGFQLVKP  | HNVLCRCEEC  |
| Cca7050                  | -----ARVD  | HTYQDKEGST  | PLHYACA--A | PENDAVISLL  | TEAGLDMNEP  | NSDGLTPLNL  |
| Cca21784                 | -----KGVD  | HTKSDREGNT  | PLHYAAA-AV | DDNHEVIEILL | IGDACDTNAA  | NSKAQTPLCF  |
| Ava16635_4               | -----NVID  | HAAFMKQNLK  | RLYFVANDRK | RNNDLLFKQL  | VDRSNIDQHP  | NVPHSTIKTL  |
| Ava9904_1                | -----KIIN  | FRYF-----G  | NMYLSQ---  | -----LYKRT  | FDKLSDSEED  | I IANKMLRLN |
| Ava6620_1                | -----REEN  | LTSVFKKSGQ  | ELIILFQR-- | -----LMFA   | LTKDEEYVEK  | KIKGCKAEFT  |
| TRPC1_Hsap_NP_003295.1   | SAKNNKDSL- | -----       | -----      | -----       | -----       | -----       |
| TRPC1_Mmus_NP_035773.1   | SAKNNKDSL- | -----       | -----      | -----       | -----       | -----       |

TRPC4 Hsap\_NP\_003297.1 VSSSDVDSL -----  
 TRPC4 Mmus\_NP\_058680.1 VSSSDVDSL -----  
 TRP\_Spur\_XP\_793901 AFSTETNTL -----  
 TRP\_Cint\_XP\_002124651.2 TAMRRD DAL -----  
 TRP\_Skow\_XP\_002733765.1 TEKHEDSL -----  
 TRP\_Lflor\_emb|CAA11261.1 LRGS�VDVL -----  
 TRP\_Bflo\_XP\_002611405.1 AEGYRTDAL -----  
 TRP4\_Sman\_XP\_002576849.1 TKARRENGL -----  
 TRP\_Nvec4\_XP\_001640409 QSLGR---I -----  
 TRP\_Nvec1\_XP\_001637374.1 ---QADNF -----  
 Cca7050 SIKSQHVNNV IPLIRAMVDI TKC-----  
 Cca21784 AVLSNQVTNI VPLIRSSADI RKA-----  
 Ava16635\_4 KPQNKNSNLP NQT----- --NGQIPEDQ QKIPIAE---  
 Ava9904\_1 FSESKHKRKP RQILYBİGKL İKELMGNDYV CFYNHLPISR KKREYEEENI KKNVNSCYNF  
 Ava6620\_1 ASLE-----

TRPC1\_Hsap\_NP\_003295.1 ----- RHSRFRLDIY RCLASP---A  
 TRPC1\_Mmus\_NP\_035773.1 ----- RHSRFRLDIY RCLASP---A  
 TRPC4\_Hsap\_NP\_003297.1 ----- RHSRSRLNIY KALASP---S  
 TRPC4\_Mmus\_NP\_058680.1 ----- RHSRSRLNIY KALASP---S  
 TRP\_Spur\_XP\_793901 ----- QHSLGMLNIY RALASQ---A  
 TRP\_Cint\_XP\_002124651.2 ----- NFCLSRINAY KGLASP---V  
 TRP\_Skow\_XP\_002733765.1 ----- RHSLHRLNTY KALASP---A  
 TRP\_Lflor\_emb|CAA11261.1 ----- GHSRRLNIY RALASP---S  
 TRP\_Bflo\_XP\_002611405.1 ----- RHSRQRLNVY RALASP---S  
 TRP4\_Sman\_XP\_002576849.1 ----- QHSTLRLNTY RALTSP---S  
 TRP\_Nvec4\_XP\_001640409 ----- GTSLHRLTY RALASPVYMS  
 TRP\_Nvec1\_XP\_001637374.1 ----- RESQRRLDIY RGLANP---V  
 Cca7050 ----- GLQDCIYQDL QILAQP---E  
 Cca21784 ----- GLQKLRİTEKL QILARP---E  
 Ava16635\_4 ---IGKLLKY VLK----- --YSFKDVYV ENEGMHDIIE NİPIDNLFİW AVLTQRWRMA  
 Ava9904\_1 LRHIATLMKQ CLKRFRVRKL TAQTKKLLV RAEKAQRLF E QFPPEQVFIW CİLFHRWEMA  
 Ava6620\_1 ---VVKFLQL AİEKLMGDGF LWNİPDVQRH DMQLNLTHYE VYFAEYIMVW GALSQRYEVA

TRPC1\_Hsap\_NP\_003295.1 LİMLT----- EEDPI LRAFELSADL K-----  
 TRPC1\_Mmus\_NP\_035773.1 LİMLT----- EEDPI LRAFELSADL K-----  
 TRPC4\_Hsap\_NP\_003297.1 LİALS----- SEDPF LTAFQLSWEL Q-----  
 TRPC4\_Mmus\_NP\_058680.1 LİALS----- SEDPF LTAFQLSWEL Q-----  
 TRP\_Spur\_XP\_793901 YİSLT----- SLDFPI NTGFERCVKLR R-----  
 TRP\_Cint\_XP\_002124651.2 YMSIV----- TRDPV RHALKLCHEL S-----  
 TRP\_Skow\_XP\_002733765.1 WİSLT----- SSDPI LTAFKLSWEL E-----  
 TRP\_Lflor\_emb|CAA11261.1 LİALS----- SKDPI LTAFELSWEİ R-----  
 TRP\_Bflo\_XP\_002611405.1 LİMLS----- SDDPI LTAFQLSWEL RGSVTTRLFN  
 TRP4\_Sman\_XP\_002576849.1 FİİLT----- SNDPI LTAFELSWEİ K-----  
 TRP\_Nvec4\_XP\_001640409 LTFİLS----- CKDPV RQAFELNKEİ V-----  
 TRP\_Nvec1\_XP\_001637374.1 FİSMT----- SNDPF LTAFELSSEL E-----  
 Cca7050 LİEA----- SPKPI EYTLMLSFF E-----  
 Cca21784 MİQA----- SAEPI KVFLELSYLY R-----  
 Ava16635\_4 EVİLSNTNSV I----- FNAV-AAKAL İAGMHHLKD D-----  
 Ava9904\_1 İLİLKYCNKİ C----- LTTVLİSAAR İRGMKİKYQS R-----  
 Ava6620\_1 EİFLİEYSGGH LQELLTRDRE FYRTQKGVYQ İANALAIİSRL LYGVEQELRF D-----

TRPC1\_Hsap\_NP\_003295.1 ----- ELSLVEV EFRNDYEELA RQCKMFAKDL LAQ---ARNŞ RELEV---İLN  
 TRPC1\_Mmus\_NP\_035773.1 ----- ELSLVEV EFRNDYEELA RQCKMFAKDL LAQ---ARNŞ RELEV---İLN  
 TRPC4\_Hsap\_NP\_003297.1 ----- ELSKVEN EFKSEYEELS RQCKQFAKDL LDQ---TRSS RELEI---İLN  
 TRPC4\_Mmus\_NP\_058680.1 ----- ELSKVEN EFKSEYEELS RQCKQFAKDL LDQ---TRSS RELEI---İLN  
 TRP\_Spur\_XP\_793901 ----- KLCQINP EFSVEFNTLA GOCEQFADİ LGH---İRNQ AEQTC---VLY  
 TRP\_Cint\_XP\_002124651.2 ----- KMATMEK EFKKDYİKLV HLYDYİLEKİ LDI---CRNS EEVNA---MLS  
 TRP\_Skow\_XP\_002733765.1 ----- HİAMREN EFKDVYQOLS HSKTYAVDL LEQ---CRSS EEVIA---VLN  
 TRP\_Lflor\_emb|CAA11261.1 ----- NİSEMEN EFRAEYEBLG İTCQNFVVDL LEQ---İRGS KELEV---İLN  
 TRP\_Bflo\_XP\_002611405.1 SFHHQFLAKT FİLLTİSTİEN EFKSEYEOLS KQCKKFASDL İSH---TRGT RELQV---İLN  
 TRP4\_Sman\_XP\_002576849.1 ----- KİGELEN EFRTEYEBLE AKQKQFATEM LAQ---TRSS SELİSİ---VLN  
 TRP\_Nvec4\_XP\_001640409 ----- EİADİEY EFRSDYLQLS QQCEEFAVAL LDQ---CRDM SEİEQ---MMS  
 TRP\_Nvec1\_XP\_001637374.1 ----- VİARRED EYEKDYİQLS QQCSQFTİİGL LDE---CRİS REQRQ---İLN  
 Cca7050 ----- RMAKERN RLKESYMALS VQLEDAAİDL İEG---LHSS QLQGI---VLH  
 Cca21784 ----- HWGYNHP LQKARYEALS MEMEELAVSM VDS---APPV LLLKV---İTN  
 Ava16635\_4 ----- QİVSE NDLGİLİVEVA DKFEMTAVGM MEİ-AYKİDK EQAHL---İLQ  
 Ava9904\_1 ----- TDVDE LARDRİENKA NDFENLAİTİ LGİFSYSİHS DİKİK---İLL  
 Ava6620\_1 ----- TAVST DDRETLİQKA AYFEELAVGİ LDN---AİGK NİFTLİNELFN

TRPC1\_Hsap\_NP\_003295.1 ----- HTSS -D----- --EPLDKRGL LEE-----  
 TRPC1\_Mmus\_NP\_035773.1 ----- HTSS -D----- --EPLDKRGL LEE-----  
 TRPC4\_Hsap\_NP\_003297.1 ----- YRDD ----- --NSLİEE-- -QS-----  
 TRPC4\_Mmus\_NP\_058680.1 ----- YRDD ----- --NSLİEE-- -QS-----  
 TRP\_Spur\_XP\_793901 ----- HDPC ----- --FYSİGES-- -----  
 TRP\_Cint\_XP\_002124651.2 GNYSDSWKGL ARKQSGRTSS NEİTNNHLMK SFSNVADE-- HİD-----  
 TRP\_Skow\_XP\_002733765.1 ----- RDND SE----- --DGFAEEDV MGG-----

TRP\_Lflor\_emb|CAA11261.1 -----HDCR -----SPDQDEE-- -KE-----  
 TRP\_Bflo\_XP\_002611405.1 -----HSDD -----MVES-- ATS-----  
 TRP4\_Sman\_XP\_002576849.1 -----HYTG ADVSGCHVSG INQSLSED-- ISE-----  
 TRP\_Nvec4\_XP\_001640409 -----VPDM -D----- --GALTKN-- --G-----  
 TRP\_Nvec1\_XP\_001637374.1 -----YPGE -----NGSVEDYA-----  
 Cca7050 -----  
 Cca21784 -----  
 Ava16635\_4 -----QNNR L-----  
 Ava9904\_1 -----KNRR VECSELIGLE VAACQDDKPP VEGDNLLMRE QDDSTTYIWP  
 Ava6620\_1 -----TKIPF

TRPC1\_Hsap\_NP\_003295.1 RMNLSRLKLA IKYNQKEFVS QSNCOQFLNT VW-----FGQMSGYRR KPTCKKIMTV  
 TRPC1\_Mmus\_NP\_035773.1 RMNLSRLKLA IKYNQKEFVS QSNCOQFLNT VW-----FGQMSGYRR KPTCKKIMTV  
 TRPC4\_Hsap\_NP\_003297.1 GNDLARLKLA IKYRQKEFVA QPNCQOLLAS RW-----YDFPGRWR RHWAVKMVTC  
 TRPC4\_Mmus\_NP\_058680.1 GNDLARLKLA IKYRQKEFVA QPNCQOLLAS RW-----YDFPGRWR RHWAVKMVTC  
 TRP\_Spur\_XP\_793901 GIGPYKVKIA IHEEQRFVA HPHCQOHLITQ LW-----YGLPSWYM TNWISSTLST  
 TRP\_Cint\_XP\_002124651.2 HPRLYOLKLA IKYGVKGFVA NPNCQQLLIA IW-----NRDLSWTRQ LSIGYKFLLA  
 TRP\_Skow\_XP\_002733765.1 KITLIRLKLA LKEEQRFVA HAHTQOLLTS IW-----YGLPGWRK HNAFVKLLIC  
 TRP\_Lflor\_emb|CAA11261.1 LKKLSRLKLA IKYKQKGFVA HPNCQOLLAA KW-----YGLGNFRR KPILKOLTVA  
 TRP\_Bflo\_XP\_002611405.1 SNSLARLKLA IKYHQKEFVS QPNCQOLLSS MW-----YEGFPSWRR KHWAVKVLIC  
 TRP4\_Sman\_XP\_002576849.1 RMQLSRLKLA IRYGQKGFVA HPHCQOLLAA IW-----YGLPGFRQ KPVFAQLTTI  
 TRP\_Nvec4\_XP\_001640409 SKSLGLVDYA LNNKGRFVA HPCVQMLLNS VI-----YGFHTWEK MGVTLLIFA  
 TRP\_Nvec1\_XP\_001637374.1 ENSLGLVNSA ISYNQKEFVA HPCOHLVMQ HI-----FGDITGWRT NHFLYRIAYV  
 Cca7050 ---GNVLEMA ISTGRKFFIA TDAVQYELNR VW-----HE-----W QEPSYKALLK  
 Cca21784 -----EIVEMA ISDRCKKFFIA HAVLQALKR SW-----AG-----E NSLPLRLILS  
 Ava16635\_4 YDDNNCLEMA VTGRCMTFLS HPCVQSLIDE QW-----KKPL---YH QNKLWKLLS  
 Ava9904\_1 WHENNAFDMA IKGDCKHFFIA HPLIQDYANQ KW-----YSKI---RR LNKEWKLMC  
 Ava6620\_1 WNHSTALELA STAGKQLFFT HEGVQGHVRN VVNGIAKLQE QYKTNSDQN INIGVQLKNS

TRPC1\_Hsap\_NP\_003295.1 LTVGIFWVVL S---LCYLIA PKS-----QF  
 TRPC1\_Mmus\_NP\_035773.1 LTVGIFWVVL S---LCYLIA PKS-----QF  
 TRPC4\_Hsap\_NP\_003297.1 FTIIGLLFPVF S---VCYLIA PKS-----PL  
 TRPC4\_Mmus\_NP\_058680.1 FTIIGLLFPVF S---VCYLIA PKS-----PL  
 TRP\_Spur\_XP\_793901 SAIGFGFPIL C---LLYIYIY BWG-----NI  
 TRP\_Cint\_XP\_002124651.2 VGMSLFMPVVL S---IAYFVA PRS-----KV  
 TRP\_Skow\_XP\_002733765.1 LAVILLPLM A---LCYLLF PHT-----KI  
 TRP\_Lflor\_emb|CAA11261.1 FGILFGFPIL S---GYMIA PHS-----KF  
 TRP\_Bflo\_XP\_002611405.1 ASIALAFPLL G---ICYLCA PKS-----SL  
 TRP4\_Sman\_XP\_002576849.1 GTLCSLEPLL A---TFYMLA PHS-----KL  
 TRP\_Nvec4\_XP\_001640409 LLFTIFIPVW A---IVYFFT PTS-----CL  
 TRP\_Nvec1\_XP\_001637374.1 LTQVIIFPVL A---VIYFFM PFL-----EV  
 Cca7050 STIIFLLQAI ARPFIILVW FLI-----VLNIQ VFGYTFSWNI  
 Cca21784 LTFVFILKAM VRPFVFCIW PFL-----LVR DSCCCITWDS  
 Ava16635\_4 LIFPFLIYFL I---SFSDPQ RSLP-----LGY  
 Ava9904\_1 FFIIFFLIIFV L---ELHSRR KRLEHHMNPQ KDPVTKETRF RQKSFCHFFL FLFFDFFRGI  
 Ava6620\_1 LRHPFSKKS L---FFY--- -----

TRPC1\_Hsap\_NP\_003295.1 GRIIHTPFMK FIIHGASYFT FLILLNLVSL V-----  
 TRPC1\_Mmus\_NP\_035773.1 GRIIHTPFMK FIIHGASYFT FLILLNLVSL V-----  
 TRPC4\_Hsap\_NP\_003297.1 GLFIRKPFIK FICHTASYLT FLFLLLASQ H-----  
 TRPC4\_Mmus\_NP\_058680.1 GLFIRKPFIK FICHTASYLT FLFLLLASQ H-----  
 TRP\_Spur\_XP\_793901 GRLMRVPHVQ FVCHISSMLV FLLLGLQSS -----FTPK  
 TRP\_Cint\_XP\_002124651.2 VRTMKSPECK FATQGMSYAQ FLMLLILNCM DRVEGFEFSS T-----FTFL  
 TRP\_Skow\_XP\_002733765.1 GOLLRTPFMK FMNHSISEGF FLLLVIVLAST VRFEGTRPAS PSDTWVD---  
 TRP\_Lflor\_emb|CAA11261.1 GKLCRKPFIK FILLHSASYLS FLVLLILVVSQ R-----I ENPFFFLFPM  
 TRP\_Bflo\_XP\_002611405.1 GKLRKPFILK FICHTTSYLF FLALVYLASN PSLVGDEADD RPDQQGPVFN TVEWMI FVWV  
 TRP4\_Sman\_XP\_002576849.1 GSMMRKPFIK ELCHSSSYLS FLALITLAAT R-----VEFLLTN  
 TRP\_Nvec4\_XP\_001640409 SOKLATEPILK FIMHTGAFGL FLILLILSSI QRFISSNT--  
 TRP\_Nvec1\_XP\_001637374.1 GRKIKRPFVK EINHITSFVV FLILLAVSSH HQFE-----  
 Cca7050 LRPRAAFTIR YRVEAFAYVA FLILLMVEAA DH-----  
 Cca21784 LRPIAETII YTAHVYSYSV FVLLILIDAL KL-----  
 Ava16635\_4 LKFYTSFSIK FITYVLAFIL YLTLYSFVVL FQWHPSPN--  
 Ava9904\_1 YSFYNAFKIK YWLHFTSHLV YTILFTIVGV TPYRPIRNRT T-----  
 Ava6620\_1 -TYYISPEST FYIHSLVYFI FLVLYTVHVL FTWEP SHKNG -----

TRPC1\_Hsap\_NP\_003295.1 YNEDKK-NTM GPALERIDYL LILWIGMI-----  
 TRPC1\_Mmus\_NP\_035773.1 YNEDKK-NTM GPALERIDYL LILWIGMI-----  
 TRPC4\_Hsap\_NP\_003297.1 IDRSDL-NRQ GPPPTIVEWM ILPWVLGFI-----  
 TRPC4\_Mmus\_NP\_058680.1 IDRSDL-NRQ GPPPTIVEWM ILPWVLGFI-----  
 TRP\_Spur\_XP\_793901 YDDDPDVDQR AEPKPTWEWL ILHGMAELM EIPPTMLYS TMEIPTAFTD DEFTTSGETP  
 TRP\_Cint\_XP\_002124651.2 LHQTSR-DGR HTQFNCEVF IMLYIAGLL-----  
 TRP\_Skow\_XP\_002733765.1 -----SPR GREPNFIEVL IALWVFGFI-----  
 TRP\_Lflor\_emb|CAA11261.1 KEEKKISELR GSPATIVELM ILGYVIGLI-----  
 TRP\_Bflo\_XP\_002611405.1 LERRQV-RPA EPVNPVWEM IFVWVLGMI-----  
 TRP4\_Sman\_XP\_002576849.1 SLDQRM-HDR GTPSITESA LVIYVI-----  
 TRP\_Nvec4\_XP\_001640409 -----FLL KFLFNFSDEL ITIWIIFGLI-----  
 TRP\_Nvec1\_XP\_001637374.1 -----IRF RKMPSGLEWL IFSWILGVA-----

Cca7050 -----EFS KPFMTKLEWI TLAYVLALI-----  
 Cca21784 -----DRI EAILDGLLLV IIFIVFGLI-----  
 Ava16635\_4 -----LNPCEWI FIVWISLTYI-----  
 Ava9904\_1 -----DIA NDPLLIIELI VVWVTFITII-----  
 Ava6620\_1 -----FVTFDVI YFLYVMVAYI-----

TRPC1\_Hsap\_NP\_003295.1 ---W--- ---SDIK RLW----- --YEGLEDLFI  
 TRPC1\_Mmus\_NP\_035773.1 ---W--- ---SDIK RLW----- --YEGLEDLFI  
 TRPC4\_Hsap\_NP\_003297.1 ---W--- ---GEIK QMW----- --DGGLQDYI  
 TRPC4\_Mmus\_NP\_058680.1 ---W--- ---GEIK QMW----- --DGGLQDYI  
 TRP\_Spur\_XP\_793901 VVTVDPATM EMSNWEAVIV RIERLHKDVM DIDEEQTDIG QSL----- --AKGIGD-I  
 TRP\_Cint\_XP\_002124651.2 ---W--- ---NEVR ELW----- --DEGPRNYI  
 TRP\_Skow\_XP\_002733765.1 ---W--- ---GECK QLW----- --EEGLKAYI  
 TRP\_Lflor\_emb|CAA11261.1 ---W--- ---SEIK QIW----- --MQALEYI  
 TRP\_Bflo\_XP\_002611405.1 ---W--- ---GEIK QLW----- --EAGLKEYI  
 TRP4\_Sman\_XP\_002576849.1 ---V--- ---QELK DMW----- --ROGKERYL  
 TRP\_Nvec4\_XP\_001640409 ---W--- ---SECK QVW----- --HEGARRYF  
 TRP\_Nvec1\_XP\_001637374.1 ---Y--- ---NEFV TLV----- --REGFHFYF  
 Cca7050 ---L--- ---QELR SFL----- --RLERRFYF  
 Cca21784 ---L--- ---EVR QLFAGNGRVM KR---VSAYL  
 Ava16635\_4 ---M--- ---ECS QLLHEKGSLL NR---IRGYI  
 Ava9904\_1 ---LDEVFQ YRFLIEDKTK GKHIKHNQYI RIL----- --NSALFEYL  
 Ava6620\_1

TRPC1\_Hsap\_NP\_003295.1 EESRNQLSFV MNSLY---- ---LATFAL KVVAHNKFH-----  
 TRPC1\_Mmus\_NP\_035773.1 EESRNQLSFV MNSLY---- ---LATFAL KVVAHNKFH-----  
 TRPC4\_Hsap\_NP\_003297.1 HDWNNLMDFV MNSLY---- ---LATISL KIVAFVKYS-----  
 TRPC4\_Mmus\_NP\_058680.1 HDWNNLMDFV MNSLY---- ---LATISL KIVAFVKYS-----  
 TRP\_Spur\_XP\_793901 KSQTLMLDER MAKIE---- ---AESEAA AVAAPVVS GG RRGKAAAGT ATNT-----  
 TRP\_Cint\_XP\_002124651.2 IQLWNVLDFF MLLIL---- ---ITSFAS SFI SHRNSWI AQQRWDEIFK ENATFVECDH  
 TRP\_Skow\_XP\_002733765.1 RQWNNLDFI MLSLY---- ---LCTISL RFTAWWLKKS GT-----  
 TRP\_Lflor\_emb|CAA11261.1 HDMWNNIMDLV TNSLY---- ---MATFTL RLLAWLQVRR ERAE-----  
 TRP\_Bflo\_XP\_002611405.1 SDQWNVMDFI MNSLY---- ---VATIAL RVVSYIKFKD ETLT-----  
 TRP4\_Sman\_XP\_002576849.1 RLKGNSTWLL YNLCYKKGVL WKTKRSTRQI KIVFYNEP-----  
 TRP\_Nvec4\_XP\_001640409 SQWNNLVTLA MLGLF---- ---IISGIL WVAGSALS--  
 TRP\_Nvec1\_XP\_001637374.1 SSGWNNMDIG MVFLL---- ---LGAFVL WTIIFIV---  
 Cca7050 TRLGHKTNCI IITMF---- ---IIFYIV RLIVIYS-----  
 Cca21784 SGLDYKMDIS MLVLF---- ---VLFFIL RAIAYFT-----  
 Ava16635\_4 NDRWNNQFDTA FALFF---- ---TMGTVL RLIPQVPLS-----  
 Ava9904\_1 SSAWNNLDDLA LILLF---- ---LLAFSI KLGDCS-A-----  
 Ava6620\_1 SSGWNNLDDIA IAIGF---- ---VATISL RISVFII-----

TRPC1\_Hsap\_NP\_003295.1 -----DFADR KDWDAFHPTL V--AEGLFAF ANVLSYLRLF  
 TRPC1\_Mmus\_NP\_035773.1 -----DFADR KDWDAFHPTL V--AEGLFAF ANVLSYLRLF  
 TRPC4\_Hsap\_NP\_003297.1 -----ALNPR ESWDMWHPPTL V--AEALFAT ANIFSSLRLI  
 TRPC4\_Mmus\_NP\_058680.1 -----ALNPR ESWDMWHPPTL V--AEALFAT ANIFSSLRLI  
 TRP\_Spur\_XP\_793901 -----TRTGR ANWSAYDPLL I--SEGFLAI ARVLSLRFPI  
 TRP\_Cint\_XP\_002124651.2 MSGNITLFGQ LVNVDPVRWM CYYSYKHADR ANWYGSDFOL I--AEALYSF GIVLSFTRIC  
 TRP\_Skow\_XP\_002733765.1 -----Y PSFTDGEVQR ATWPGDDPTL I--SEGFAV ANVFSFRII  
 TRP\_Lflor\_emb|CAA11261.1 -----GIHPR STWQADHPPTL V--AEGLFAT ANIFSSLRLI  
 TRP\_Bflo\_XP\_002611405.1 -----RYINR GOWDSFDFVL V--SECLFAA ANIVSTLKLKLV  
 TRP\_Nvec4\_XP\_001640409 -----VSKEG SLAESYRFTL L--ANAFETI GVLLAFLHFS  
 TRP\_Nvec1\_XP\_001637374.1 -----DFDSN AKLAHDVLLS T--ADGMVAF GVVASFRLI  
 Cca7050 -----KVESPNDVLR L--TSYLAV ASTMSCRLL  
 Cca21784 -----TDNLVL LRGSCYFLGP ATVLACVRVL  
 Ava16635\_4 -----Y----- ---SRHMYAV IGFVLFHRL  
 Ava9904\_1 -----W----- ---VHRVVAL IILILYRIF  
 Ava6620\_1 -----YDQTN GGENARNLNV I--ARLVFGL FGVFLYMRFF

TRPC1\_Hsap\_NP\_003295.1 FMYTTSSILG PLQISMGCML QDFGKFLGMF LLVLFSTTIG LTQLYDKGYT SKEQ-----  
 TRPC1\_Mmus\_NP\_035773.1 FMYTTSSILG PLQISMGCML QDFGKFLGMF LLVLFSTTIG LTQLYDKGYT SKEQ-----  
 TRPC4\_Hsap\_NP\_003297.1 SLFTANSHLG PLQISLGRML LDILKFLFTY CLVLLAFANG LNQLYFY-YE ETKG-----  
 TRPC4\_Mmus\_NP\_058680.1 SLFTANSHLG PLQISLGRML LDILKFLFTY CLVLLAFANG LNQLYFY-YE ETKG-----  
 TRP\_Spur\_XP\_793901 CYTVMNRHVQ PMQISLGNMM FDICKFLLIF CFVWFAFSLG MNQLYGY-YE YITR-----  
 TRP\_Cint\_XP\_002124651.2 YILEVNEKFG PLQISLSTV GDIIKWSGIF FMIFGAFLIG LFNLYSY-YR EPEA-----  
 TRP\_Skow\_XP\_002733765.1 YLFQANPYLG PLQISLGRML IDIAKFLFTY FLVLLSFACG LNQLYFY-YE SSSP-----  
 TRP\_Lflor\_emb|CAA11261.1 YIFTVNAHLG PLQISLGRMV SDIVKFLISVY FLVLFSAFAC LNHLWY-YA ALRA-----  
 TRP\_Bflo\_XP\_002611405.1 FLFTSNHSHLG PLQISLGRMG EDIVKFLFTY FLVLLAFANG LNQLYFY-YN NMNGSLQTDG  
 TRP4\_Sman\_XP\_002576849.1 YVFTVSPQLG PLQISLGRML HDIFRFECVY FLVLLAFACG FNQLYWF-YA KNRA-----  
 TRP\_Nvec4\_XP\_001640409 NAVQVNSTLG PLQISLGRML IDIAKFLFTY FLVLLAFVVA LRRVYSQ-YV WAGK-----  
 TRP\_Nvec1\_XP\_001637374.1 YLCQISRYLG LLQLSLSRMV RVIFQAFATS CVVLSFSVA MTMLYMSFE AYQL-----  
 Cca7050 QYLRVHRVIG FTQKSYGKVV QNMAGFVVIL FIYLMFAFAG LVNLYGA---  
 Cca21784 RYLSWHVPVIG FVQRAISKVI EEILLFLVIL MVFLTAFACG ITNVYRG---  
 Ava16635\_4 QYLVIIKDSG PFVYVFRML KNLSGFLILA LIFLLAYGVA SQTILYPNLP RDDP-----  
 Ava9904\_1 QYLIMSAYFG VIVLIIFALA EEVYVVFVVL LLSMIGFGAA MQAVVASDTL YEDF-----  
 Ava6620\_1 QYVLVIRGLG PLIYTCYIAF KRMLKFLVIF VLVSLGFGII EVTLTSTNQ-----

TRPC1\_Hsap\_NP\_003295.1 --KDCVGIF- ----- --CEQSN-D TFHSFI-GTC FALFWYIFSL AHVAIFVTRF  
TRPC1\_Mmus\_NP\_035773.1 --KDCVGIF- ----- --CEQSN-D TFHSFI-GTC FALFWYIFSL AHVAIFVTRF  
TRPC4\_Hsap\_NP\_003297.1 --LTCKGIR- ----- --CEKQN--N AFSTLF-ETL QSLFWSIFGL --INLYVTNV  
TRPC4\_Mmus\_NP\_058680.1 --LSCKGIR- ----- --CEKQN--N AFSTLF-ETL QSLFWSIFGL --INLYVTNV  
TRP\_Spur\_XP\_793901 --VICDTNN- ----- --PMEEHCKQ PFETVQ-YTM STLFWALFGL --PEMNIVDI  
TRP\_Cint\_XP\_002124651.2 ----- --KTTK AFTTIE-ETF IITLWWSMFGFL --ADYRGVEV  
TRP\_Skow\_XP\_002733765.1 --VHSQDAD- ----- --CPSNSNPD AFLSLD-RSM QTLFWALFGL --VGTDVTKL  
TRP\_Lflor\_emb|CAA11261.1 --EECE--- ----- --AGIT HSCDIKY--R SFANLF-EIL QSLYWAVYGL --VDLEHAHL  
TRP\_Bflo\_XP\_002611405.1 NDYYCYGVR- ----- --CHDQN--N AFSSLW-ETL QALFWSIFGL --VNLVYTKV  
TRP4\_Sman\_XP\_002576849.1 --RNCKNVHF TLEEGQKDVY DYCI TRG--T YFTNLF-EIV QSLYWSAYGL --IDLTSINL  
TRP\_Nvec4\_XP\_001640409 -TPHTISLY- ----- --S VFCSVQ-GSM RLFWALFGL --TELEEFNT  
TRP\_Nvec1\_XP\_001637374.1 --PRPVKNVTS DIDAILD--- ----- --K GYDNL-LSTM VTLWASLDM --VGLDTLNV  
Cca7050 ----- --TGF AVNKTEANNT QNCPS---E GFESMQ-SSA QSLFWSIFGL --LDVGLLSN  
Cca21784 ----- --TRF VFNETVRANA TNCPA---A DFGVW-ISG ASLFWALFGL --LERQDMEN  
Ava16635\_4 ----- --SYAFVFGNIF FRPYFQVFG --FFLEHQA  
Ava9904\_1 ----- --AQFTLF-TIF FRPYWQLFGE --FFLPQLGT  
Ava6620\_1 ----- --GWNLLR-ILL FSPYQVFG --FGLANRT

TRPC1\_Hsap\_NP\_003295.1 ----- --SY--- --GEELQSF- ----- --VGAVI  
TRPC1\_Mmus\_NP\_035773.1 ----- --SY--- --GEELQSF- ----- --VGAVI  
TRPC4\_Hsap\_NP\_003297.1 ----- --KA--- --QHEFTFF- ----- --VGATM  
TRPC4\_Mmus\_NP\_058680.1 ----- --KA--- --QHEFTFF- ----- --VGATM  
TRP\_Spur\_XP\_793901 ----- --RG VDHEFTFF- ----- --VGLML  
TRP\_Cint\_XP\_002124651.2 ----- --KY--- --DHQLTRI- ----- --VGYQL  
TRP\_Skow\_XP\_002733765.1 ----- --PTQ--- --GHNYTEF- ----- --VGEIL  
TRP\_Lflor\_emb|CAA11261.1 ----- --DE--- --PHKLTFL- ----- --TCKLM  
TRP\_Bflo\_XP\_002611405.1 ----- --ENAQG YKHAFTEF- ----- --VGTWM  
TRP4\_Sman\_XP\_002576849.1 ----- --EY--- --PHAFTEF- ----- --VGLTL  
TRP\_Nvec4\_XP\_001640409 ----- --DP---S FPTKITQS- ----- --TCEVL  
TRP\_Nvec1\_XP\_001637374.1 ----- --FK--- --KQSLIQF- ----- --WTAAL  
Cca7050 ----- --CTHEAT- ----- --ACKIV  
Cca21784 ----- --CSGAEF- ----- --AQGIT  
Ava16635\_4 NAFTNGSSAM FGNSEFVVFV SSNF----- --FVYFF  
Ava9904\_1 D-INGGSGVI SGNLTSILF SGSTKTSNGT VHSCVAQSSL QTNPLLEFD YTRHPLPYFI  
Ava6620\_1 --FSISFQNG NGTGEPCFE STTF----- --IAYVF

TRPC1\_Hsap\_NP\_003295.1 VCTYNVVVVI VLTKLIVAML HKSEQLIANH EDKEWKFARA KLWLSYFDDK -CTLPPPFNI  
TRPC1\_Mmus\_NP\_035773.1 VCTYNVVVVI VLTKLIVAML HKSEQLIANH EDKEWKFARA KLWLSYFDDK -CTLPPPFNI  
TRPC4\_Hsap\_NP\_003297.1 FCTYNVISLV VLLNMLIAMM NNSYQLIADH ADTEWKFART KLWMSYFEEG -CTLPTPFNV  
TRPC4\_Mmus\_NP\_058680.1 FCTYNVISLV VLLNMLIAMM NNSYQLIADH ADTEWKFART KLWMSYFEEG -CTLPTPFNV  
TRP\_Spur\_XP\_793901 YAAYHVIAIV VLLNMLIAMM SNTYTRIEDD SEVQWKFSRS KLWMSYFAGR -GSLPAPFNV  
TRP\_Cint\_XP\_002124651.2 YGAYNIITVI TMLNMLIAMM NRSYSDVEVD SDLEWKFARA KLWLSYFDPG -STLPPPFNL  
TRP\_Skow\_XP\_002733765.1 FACYHVVAII VLLNMLIAMM SKSYQETEDH ADREWKFART KLWMSYFDEG -STLPPPFNL  
TRP\_Lflor\_emb|CAA11261.1 FGSYSMTAII TLLNMLIAMM SNSYQLIYSQ ADEWKFARS RLWISYFAEG -ATVPPPFNI  
TRP\_Bflo\_XP\_002611405.1 FCTYNSYIAFI VLLNMLIAMM NNSYEQIIVGQ VDIWKFARS KLWISYFGEV -SKLRRGRE-  
TRP4\_Sman\_XP\_002576849.1 FALFNIASIL VAINMLIAMM SNSFOKVADS EDFLWKFARS RMMEYI IKG -SVLPAFBSV  
TRP\_Nvec4\_XP\_001640409 FFLYHAASMV VLLNMLIAMM SNSYQVEDN IETEFKART QLWTDYIGDA VFTLPPFNL  
TRP\_Nvec1\_XP\_001637374.1 FGLWLLQAMI TLLNMLIALV TNKFDEFQSN ADTEWKASFG ATVID-VQKS -QRYPIPFNL  
Cca7050 FGVWLVSSVI TLLNMLIAVV TNKFDEVEEN ADTEWKFTRA ELLMQ-VKHT -HSIPIPFNI  
Cca21784 LVIWLILSNI LLINI IIAKF NNTFVEIESN AAIYWKYKFF NS-VKEFRDK -PVLPPPFNV  
Ava16635\_4 LALWLI FSNV LLVNL IIAKF NNIYLIIVEAK SSIIWKFTRY SA-IEEFRLK -FTFPFPFIF  
Ava9904\_1 LIILQLIANV LLNMLIAVF TKIENEISEN ADSIYLTQFL EV-VDEYQRK -SLFPPPFNL

TRPC1\_Hsap\_NP\_003295.1 ITPSKTI--- --CYMISSL-- --SKWICSHTS KGKVKRQNSL K-----EWRN LKQ-----  
TRPC1\_Mmus\_NP\_035773.1 ITPSKTI--- --CYMISSL-- --SKWICSHTS KGKVKRQNSL K-----EWRN LKQ-----  
TRPC4\_Hsap\_NP\_003297.1 ITPSKSL--- --WYLIKWI-- --WTHLCKKKM RRPESFGTI GVRTQHRAA DNL-----  
TRPC4\_Mmus\_NP\_058680.1 ITPSKSL--- --WYLVKVI-- --WTHLCKKKM RRPESFGTI G-----RRAA DNL-----  
TRP\_Spur\_XP\_793901 IETPKSM--- --LYLFRWL-- --RGKLGSEKH RQIRDRNKA KME-----  
TRP\_Cint\_XP\_002124651.2 LTLPCQIHDG VIYIFKLT-- --RKELYKKTR RASSQRR- -----DHHR KKTELK---  
TRP\_Skow\_XP\_002733765.1 IITPKSM--- --VCFKAI-- --QRIMCGSCE KTKSRPQRS L-----EGTI KKTHLNSDGV  
TRP\_Lflor\_emb|CAA11261.1 ITPSKSF--- --TNMMLTF-- --KSLILSHTA EQQAKWTVN -----RSTV KNIN-----  
TRP\_Bflo\_XP\_002611405.1 ITPSKFF--- --WYTIMWVKN SCSEICNFR- KKQLNRMRSI G----KMTA VKL-----  
TRP4\_Sman\_XP\_002576849.1 ----- --AYQLSEI-- --QEMVRGKKS RESIKRTNIS INE-----  
TRP\_Nvec4\_XP\_001640409 ITPSIASL--- --INFF----- -----  
TRP\_Nvec1\_XP\_001637374.1 ITPPKYI--- --VRLI----- -----  
Cca7050 LHVTVDI--- --LEWL----- -----  
Cca21784 LNEIVDL--- --LEFLFRK-- --RRPNLEAM WMSLIPLTV TPE-----  
Ava16635\_4 IVILYRV--- --VKRLYL-- --CNRYRVNSTV RSKDRGNNE- -----  
Ava9904\_1 LSHIRKL--- --VKFLYGL- --CAVRIFRKNI YKEDMKNFH- -----  
Ava6620\_1 LVYLFRT--- --FGICKTV-- --CQDFKHEE ETMEDEFQRD THFNRAKVYP VYFGHHNENG

TRPC1\_Hsap\_NP\_003295.1 ----- --KRDEN YQKVMCCLVH RYLTSMRQKM QSTDQATVEN LNELRQDLSK FRNEIRDLLG  
TRPC1\_Mmus\_NP\_035773.1 ----- --KRDEN YQKVMCCLVH RYLTSMRQKM QSTDQATVEN LNELRQDLSK FRNEIRDLLG  
TRPC4\_Hsap\_NP\_003297.1 ----- --RRHQ YQEVMRNLVK RYVAAMIRDA KTEEGLTEEN FKELKQDHS FRFEVLGLL-  
TRPC4\_Mmus\_NP\_058680.1 ----- --RRHQ YQEVMRNLVK RYVAAMIREA KTEEGLTEEN VKELKQDHS FRFEVLGLL-

|                          |               |            |            |            |            |            |
|--------------------------|---------------|------------|------------|------------|------------|------------|
| TRP_Spur_XP_793901       | -----EKEQQ    | YREIMGKIVK | RYIFDAKRDE | --DENNQEQW | VNRLKQDHS  | FKYEMFEALT |
| TRP_Cint_XP_002124651.2  | -----RMSMH    | HINVMTRIVK | RYVLRQVVEE | AGGSNTSEAD | LQEIKHDISS | LRYEVIGGLT |
| TRP_Skow_XP_002733765.1  | IGPPLQENIK    | YQDVMKRLVS | RYIHQQKAEQ | K-QDGVNEDD | LNEIKQDHS  | LRYELRADR- |
| TRP_Lflor_emb CAA11261.1 | -----KREIR    | YQYVIRNLIS | RYIMNKQRPQ | K-DEMVSQDD | INELKQDHS  | FRFELLTILS |
| TRP_Bflo_XP_002611405.1  | -----RKDMA    | YKDVIONLVR | RYIANEIRDR | ESSEGLCEDD | INELKQDHS  | FRYEMLALL- |
| TRP4_Sman_XP_002576849.1 | -----NKSTQ    | SKPLFSDIKQ | ----PVHRKI | TTSTGINKSD | FNKTLLPSST | SIGGIIGFV- |
| TRP_Nvec4_XP_001640409   | -----         | -----      | -----      | -----      | -----      | -----      |
| TRP_Nvec1_XP_001637374.1 | -----         | -----      | -----      | -----      | -----      | -----      |
| Cca7050                  | -----         | -----      | -----      | -----      | -----      | -----      |
| Cca21784                 | -----RRFEA    | QKELLQTLKR | K----EERE  | GMESPSTKSD | MRKVSEQLHE | LK-----    |
| Ava16635_4               | -----HKEKE    | KEKILDFFEK | RCVLACNFNL | EQTNEL---- | --NLDKRITE | VDNRLKNT-- |
| Ava9904_1                | -----RKNAE    | RWKWKDIIQQ | QGLNRWESKR | LSEQEE---- | --SVRNLLSN | VETKLEDVYR |
| Ava6620_1                | FADEYWRNRE    | KIRIKGNLQ- | --LKKRQKQV | EYLTQKSQEQ | SLHRKYTVKY | FYFNFTGVRR |
| TRPC1_Hsap_NP_003295.1   | FRTSKYAMFY    | --PRN----  | -----      | -----      | -----      | -----      |
| TRPC1_Mmus_NP_035773.1   | FRTSKYAMFY    | --PRN----  | -----      | -----      | -----      | -----      |
| TRPC4_Hsap_NP_003297.1   | -RGSKLSTIQ    | --SANASKES | SNSADSDEKS | DSEGN----- | -----KD    | KKKNFSLFDL |
| TRPC4_Mmus_NP_058680.1   | -RGSKLSTIQ    | --SANA---- | ASSADSDEKS | QSENG----- | -----KD    | KRKNLSLFDL |
| TRP_Spur_XP_793901       | GMDKKMSEME    | QRIEDGGVKE | PGTQMFHKME | DVVKRPLYQP | D-----SM   | QSVISGCSDL |
| TRP_Cint_XP_002124651.2  | RWDSKIEELF    | NSLEKQKTEE | GQIQISTAVA | QIERKS---- | -----KN    | ERLAPPVLDA |
| TRP_Skow_XP_002733765.1  | -KKEQMRGTS    | QIENVKHEII | GELRGISGAP | ENESTTIVGA | PRRSLSTVNP | PSFISQSFDK |
| TRP_Lflor_emb CAA11261.1 | DNGFETPTVH    | Q-AKTSRLD  | RMWKNLSAAT | EGQTETLMEE | AGLDEE---- | -----      |
| TRP_Bflo_XP_002611405.1  | -KSDGGEGGP    | --DSLQDERP | SRRKRRTGKY | SLEALS---- | -----QP    | RSRSMNNLDR |
| TRP4_Sman_XP_002576849.1 | -DNPAFENEE    | --VIVNKTSI | SSSVLDGKK  | QGKSTTVLDQ | KTSVSDVTSQ | QLNPNFIPCT |
| TRP_Nvec4_XP_001640409   | -----         | -----      | -----      | -----      | -----      | -----      |
| TRP_Nvec1_XP_001637374.1 | -----         | -----      | -----      | -----      | -----      | -----      |
| Cca7050                  | -----         | -----      | -----      | -----      | -----      | -----      |
| Cca21784                 | -----         | -----      | -----      | -----      | -----      | -----      |
| Ava16635_4               | -----OHLIVTLT | NKVDSLVRST | GSF--E---- | -----SE    | QDFFSLQGD  | T          |
| Ava9904_1                | NCHTLLDHMG    | SDEPLTMMT  | SEIREVRRQL | ADFGVH---- | -----SF    | QNYLLILHLV |
| Ava6620_1                | KGVKSVNLFF    | CAYPFNLX-- | -----      | -----      | -----      | -----      |
| TRPC1_Hsap_NP_003295.1   | -----         | -----      | -----      | -----      | -----      | -----      |
| TRPC1_Mmus_NP_035773.1   | -----         | -----      | -----      | -----      | -----      | -----      |
| TRPC4_Hsap_NP_003297.1   | TTLIHPRSA     | IASERHNISN | --GSALVVQE | PPREKQRKVN | FVT-----   | -----      |
| TRPC4_Mmus_NP_058680.1   | TTLIHPRSA     | IASERHNLSN | --GSALVVQE | PPREKQRKVN | FVA-----   | -----      |
| TRP_Spur_XP_793901       | MTAASKDLMN    | SKGSNNADNS | PILDDGLSDP | STKNRRQPKS | TSMPCNIAGY | LYPPDWEKNE |
| TRP_Cint_XP_002124651.2  | TEINK-----    | -----      | -----      | -----      | -----      | -----      |
| TRP_Skow_XP_002733765.1  | SELESKDDL     | IHTIRSEIKE | ELQESLRR-- | -----      | -----      | -----      |
| TRP_Lflor_emb CAA11261.1 | -----         | -----      | -----      | -----      | -----      | -----      |
| TRP_Bflo_XP_002611405.1  | LEE-HPAVDE    | TDSAKACLSR | PLAAAAVRSV | FPVLEQRQRN | -VM-----   | -----      |
| TRP4_Sman_XP_002576849.1 | SAVVCEETIT    | NNTDQNTVEK | QLQQSKLKQP | PSQLSIETKT | PSM-----   | -----      |
| TRP_Nvec4_XP_001640409   | -----         | -----      | -----      | -----      | -----      | -----      |
| TRP_Nvec1_XP_001637374.1 | -----         | -----      | -----      | -----      | -----      | -----      |
| Cca7050                  | -----         | -----      | -----      | -----      | -----      | -----      |
| Cca21784                 | -----         | -----      | -----      | -----      | -----      | -----      |
| Ava16635_4               | MGSMHGRRIL    | IRYFNVSIL  | QLFISPLSYT | TSPVLYQERL | NIF-----   | -----FILC  |
| Ava9904_1                | I--KHITRST    | HFKITGLLLL | PLYIYTVYSC | TSPLCYFPKT | FIFVVTIQYF | PINICLFLFC |
| Ava6620_1                | -----         | -----      | -----      | -----      | -----      | -----      |
| TRPC1_Hsap_NP_003295.1   | -----         | -----      | -----      | -----      | -----      | -----      |
| TRPC1_Mmus_NP_035773.1   | -----         | -----      | -----      | -----      | -----      | -----      |
| TRPC4_Hsap_NP_003297.1   | -----         | --DIKNFGLF | HRRSKQNAAE | QNaNQIFSVS | EEVARQQAAG | PLERNIQLES |
| TRPC4_Mmus_NP_058680.1   | -----         | --DIKNFGLF | HRRSKQNAAE | QNaNQIFSVS | EEITRQQAAG | ALERNIELES |
| TRP_Spur_XP_793901       | PILFMEDEPD    | VPILGGPPRK | ESKRRFSAN  | HMMNHIGSRH | LKRKKSHTKN | TRV-----   |
| TRP_Cint_XP_002124651.2  | -----         | -----      | -----      | -----      | -----      | -----      |
| TRP_Skow_XP_002733765.1  | -----         | -----      | --ALNSAAQE | SSVNGLLPTS | SDLYHHTLYT | QL-----    |
| TRP_Lflor_emb CAA11261.1 | -----         | -----      | -----      | -----      | -----      | -----      |
| TRP_Bflo_XP_002611405.1  | -----N        | QGVAGAADR  | WSRGNPGGGL | QDGNPLLLQT | ERVS---SMG | RISRTFVTLA |
| TRP4_Sman_XP_002576849.1 | ---NIIKNDK    | MPNLKNSTFT | NETRSQTVKQ | DHADKIESVE | NEATSQLFSD | RKSTDHKTIE |
| TRP_Nvec4_XP_001640409   | -----         | -----      | -----      | -----      | -----      | -----      |
| TRP_Nvec1_XP_001637374.1 | -----         | -----      | -----      | -----      | -----      | -----      |
| Cca7050                  | -----         | -----      | -----      | -----      | -----      | -----      |
| Cca21784                 | -----         | -----      | -----      | -----      | -----      | -----      |
| Ava16635_4               | MKVSEDLVVL    | SR-----    | -----      | -----      | -----      | -----      |
| Ava9904_1                | ---SSRMIYD    | SMLCCV---- | -----      | -----      | -----      | -----      |
| Ava6620_1                | -----         | -----      | -----      | -----      | -----      | -----      |
| TRPC1_Hsap_NP_003295.1   | -----         | -----      | -----      | -----      | -----      | -----      |
| TRPC1_Mmus_NP_035773.1   | -----         | -----      | -----      | -----      | -----      | -----      |
| TRPC4_Hsap_NP_003297.1   | RGLASRGDLS    | IPGLSEQCVL | VDHRERNTDT | LGLQVGKRV  | P-FKSEKVVV | EDTVPIIPKE |
| TRPC4_Mmus_NP_058680.1   | KGLASRGDRS    | IPGLNEQCVL | VDHRERNTDT | LGLQVGKRV  | STFKSEKVVV | EDTVPIIPKE |
| TRP_Spur_XP_793901       | -----         | -----      | -----      | -----      | -----      | -----      |
| TRP_Cint_XP_002124651.2  | -----         | -----      | -----      | -----      | -----      | -----      |
| TRP_Skow_XP_002733765.1  | -----         | -----      | -----      | -----      | -----      | -----      |
| TRP_Lflor_emb CAA11261.1 | -----         | -----      | -----      | -----      | -----      | -----      |
| TRP_Bflo_XP_002611405.1  | SPVLGRRRRQ    | QRKGLDE--- | -----EEDTE | LGAMSRTRN  | FANENDMGSV | FTCAPITEID |

|                          |            |            |            |       |       |       |
|--------------------------|------------|------------|------------|-------|-------|-------|
| TRP4_Sman_XP_002576849.1 | HCKLNKISHH | PMDECSQMKN | QRSDLV---- | ----- | ----- | ----- |
| TRP_Nvec4_XP_001640409   | -----      | -----      | -----      | ----- | ----- | ----- |
| TRP_Nvec1_XP_001637374.1 | -----      | -----      | -----      | ----- | ----- | ----- |
| Cca7050                  | -----      | -----      | -----      | ----- | ----- | ----- |
| Cca21784                 | -----      | -----      | -----      | ----- | ----- | ----- |
| Ava16635_4               | -----      | -----      | -----      | ----- | ----- | ----- |
| Ava9904_1                | -----      | -----      | -----      | ----- | ----- | ----- |
| Ava6620_1                | -----      | -----      | -----      | ----- | ----- | ----- |

|                          |            |            |            |       |       |       |
|--------------------------|------------|------------|------------|-------|-------|-------|
| TRPC1_Hsap_NP_003295.1   | -----      | -----      | -----      | ----- | ----- | ----- |
| TRPC1_Mmus_NP_035773.1   | -----      | -----      | -----      | ----- | ----- | ----- |
| TRPC4_Hsap_NP_003297.1   | KHAKEEDSSI | DYDLNLPDTV | THEDYVTTRL | ----- | ----- | ----- |
| TRPC4_Mmus_NP_058680.1   | KHAHEEDSSI | DYDLSPTDTA | AHEDYVTTRL | ----- | ----- | ----- |
| TRP_Spur_XP_793901       | -----      | -----      | -----      | ----- | ----- | ----- |
| TRP_Cint_XP_002124651.2  | -----      | -----      | -----      | ----- | ----- | ----- |
| TRP_Skow_XP_002733765.1  | -----      | -----      | -----      | ----- | ----- | ----- |
| TRP_Lflor_emb CAA11261.1 | -----      | -----      | -----      | ----- | ----- | ----- |
| TRP_Bflo_XP_002611405.1  | DSAEEDASHD | EENSSSESAS | RHE----VV  | ----- | ----- | ----- |
| TRP4_Sman_XP_002576849.1 | -----      | -----      | -----      | ----- | ----- | ----- |
| TRP_Nvec4_XP_001640409   | -----      | -----      | -----      | ----- | ----- | ----- |
| TRP_Nvec1_XP_001637374.1 | -----      | -----      | -----      | ----- | ----- | ----- |
| Cca7050                  | -----      | -----      | -----      | ----- | ----- | ----- |
| Cca21784                 | -----      | -----      | -----      | ----- | ----- | ----- |
| Ava16635_4               | -----      | -----      | -----      | ----- | ----- | ----- |
| Ava9904_1                | -----      | -----      | -----      | ----- | ----- | ----- |
| Ava6620_1                | -----      | -----      | -----      | ----- | ----- | ----- |
